# Supplementary material for: Rising rural body-mass index is the main driver of the global obesity epidemic in adults
Source: Springer Nature journal article supplement (doi:10.1038/s41586-019-1171-x), 2019-05-08
Supplement: MOESM1 [file 41586_2019_1171_MOESM1_ESM.pdf › 41586_2019_1171_MOESM1_ESM.pdf]

## **Rising rural body-mass index is the main driver of the global obesity epidemic in adults**

NCD Risk Factor Collaboration (NCD-RisC)\*

---

\*A list of authors and their affiliations appears in the online version of the paper.

**Supplementary Information.** Statistical model for estimating BMI trends by rural and urban place of residence.

## Statistical model

The Bayesian hierarchical model used for estimating mean body-mass index (BMI) trends by rural and urban place of residence was summarised in Methods. Here we provide a more detailed description of the model. Further details can be found in two statistical papers<sup>1,2</sup> and in the appendices of two empirical public health papers.<sup>3,4</sup>

### 1 Data

For each data source, we obtained data stratified by rural or urban place of residence, age and sex, including information on sample mean BMI, and whether the study sample was from the national population, from sub-national regions or from one or a small number of communities. For sources without information on place of residence, we obtained age-and-sex-stratified data.

Despite using the largest and most comprehensive database of human anthropometry, there were gaps in our data, because health and nutrition surveys are done at different frequencies across the world. For women, our analysis was based on 14,278 age-group-specific sample means (39% rural, 48% urban and 13% mixed) from 1,250 non-overlapping country-by-year combinations; for men, we had 12,958 sample means (37% rural, 47% urban and 16% mixed) from 1,157 non-overlapping country-by-year combinations. 10 countries (5.0%) had no data for women and 17 countries (8.5%) had no data for men. In addition, some data sources only had data in certain age groups.

60% of observations were from nationally representative studies, 17% from sub-national regions and 23% from studies in one or a few communities. Non-national data may have systematic differences from national data. In addition, BMI levels may vary across communities in the same country which increases the variance of data.

Our model was designed to use these disparate data sources to estimate mean BMI for each country  $\times$  urban or rural place of residence  $\times$  year  $\times$  age combination. We fitted separate models for men and women because BMI levels, trends and urban-rural differences differ between them.<sup>5,6</sup>

## 2 Model

Each study contributed from 1 to 18 mean BMI values according to how many age groups were observed, and whether the study provided data stratified on urban and rural places of residence. The likelihood for an observation at urbanisation level  $s$  (urban-only, rural-only or mixed; referred to as stratum hereinafter) and age group  $h$  from study  $i$ , carried out in country  $j$  at time  $t$  is:

$$y_{s,h,i} \sim N(a_{j[i]} + b_{j[i]}t_i + u_{j[i],t_i} + \gamma_i(z_h) + \mathbf{X}_i\boldsymbol{\beta} + e_i + I_{s,i}[p_{j[i]} + q_{j[i]}t_i + d_i], SD_{s,h,i}^2/n_{s,h,i} + \tau_i^2)$$

where the country-specific intercept and linear time slope from the  $j^{\text{th}}$  country ( $j = 1 \dots J$ , where  $J = 200$  which is the total number of countries in our analysis) are denoted  $a_j$  and  $b_j$ , respectively. We describe the hierarchical model used for the  $a$ 's and  $b$ 's in Section 2.1. Letting  $T = 33$  be the total number of years from 1985 to 2017, the  $T$ -vector  $u_j$  captures smooth non-linear change over time in country  $j$ , as described in Section 2.2. The age effects of the  $h^{\text{th}}$  age group (with mid-age  $z$ ) in study  $i$  are denoted by  $\gamma_i$ ; we describe the age model in Section 2.3. The matrix  $\mathbf{X}$  contains terms describing whether studies were representative at the national, sub-national or community level. In addition, a random effect,  $e_i$ , is estimated for each study, described in Section 2.4.

The likelihood variance has two components. Sampling uncertainty in mean BMI is calculated for each study-stratum-age-group as  $SD_{s,h,i}^2/n_{s,h,i}$ , where  $SD_{s,h,i}$  is the standard deviation of

BMI values observed in an age group and stratum of a particular study and  $n_{s,h,i}$  is the corresponding sample size. Additional residual variability between age groups within a study is captured by the  $\tau^2$  terms, described in Section 2.5.

The difference in mean BMI between urban and rural residents is specified by time-varying country-level offset terms ( $p_j$  and  $q_j$ ), as described in Section 2.6. We also include an additional study-specific random effect ( $d_i$ ) for this difference, which accounts for how the urban-rural difference in each study differs from that of the country.  $I$  indicates whether the observation is from an urban, rural or mixed population, as also explained in Section 2.6.

## 2.1 Linear components of the country time trends

The model has a hierarchical structure: studies are nested in countries, which are nested in regions (indexed by  $k$ ), which are nested in super-regions (indexed by  $l$ ), which are, of course, all nested in the globe. This structure allows the model to share information across units to a greater degree when data are non-existent or weakly informative (e.g., have a small sample size or are not nationally representative), and to a lesser extent in data-rich countries and regions.<sup>7</sup>

The  $a$  and  $b$  terms are country-specific linear intercepts and time slopes with terms at each level of the hierarchy, denoted by the superscripts  $c$ ,  $r$ ,  $s$ , and  $g$ , respectively:

$$a_j = a_j^c + a_{k[j]}^r + a_{l[k]}^s + a^g,$$

$$b_j = b_j^c + b_{k[j]}^r + b_{l[k]}^s + b^g,$$

$$a_j^x \sim N(0, \kappa_a^x),$$

$$b_j^x \sim N(0, \kappa_b^x) \text{ (where } x = \{c, r, s\})$$

The  $\kappa$  terms are each assigned a flat prior on the standard deviation scale.<sup>8</sup> We also assign flat priors to  $a^g$  and  $b^g$ .

## 2.2 Non-linear change

Mean BMI may change non-linearly over time.<sup>5,6,9</sup> We capture smooth non-linear change in time in urban and rural strata of country  $j$  using the vector  $u_j$ . Just as  $a_j$  and  $b_j$  are each defined as the sum of country, region, super-region, and global components, we define:

$$u_j = u_j^c + u_{k[j]}^r + u_{l[k]}^s + u^g$$

In order to allow the model to differentiate between the degrees of non-linearity that exist at the country, region, super-region, and global levels, we assign each of the  $u$ 's four components a Gaussian autoregressive prior as in Breslow and Clayton<sup>10</sup> and Rue and Held.<sup>11</sup> In particular, the  $T$ -vectors  $u_j^c$  ( $j = 1 \dots J$ ),  $u_k^r$  ( $k = 1 \dots K$ ),  $u_l^s$  ( $l = 1 \dots L$ ), and  $u^g$  each have a normal prior with mean zero and precision  $\lambda_c P$ ,  $\lambda_r P$ ,  $\lambda_s P$ , and  $\lambda_g P$  respectively, where the scaled precision matrix  $P$  in the Gaussian autoregressive prior penalizes first and second differences:

$$P = \begin{bmatrix} 1 & 0 & 0 & \dots & 0 \\ -2 & 1 & 0 & \dots & 0 \\ 1 & -2 & 1 & \dots & 0 \\ 0 & 1 & -2 & \dots & 0 \\ 0 & 0 & 1 & \dots & 0 \\ \vdots & \vdots & \vdots & \ddots & \vdots \\ 0 & 0 & 0 & \dots & 1 \end{bmatrix} \begin{bmatrix} 1 & -2 & 1 & 0 & 0 & \dots & 0 \\ 0 & 1 & -2 & 1 & 0 & \dots & 0 \\ 0 & 0 & 1 & -2 & 1 & \dots & 0 \\ \vdots & \vdots & \vdots & \vdots & \vdots & \ddots & \vdots \\ 0 & 0 & 0 & 0 & 0 & \dots & 1 \end{bmatrix}$$

$$= \begin{bmatrix} 1 & -2 & 1 & 0 & 0 & \dots & 0 \\ -2 & 5 & -4 & 1 & 0 & \dots & 0 \\ 1 & -4 & 6 & -4 & 1 & \dots & 0 \\ 0 & 1 & -4 & 6 & -4 & \dots & 0 \\ 0 & 0 & 1 & -4 & 6 & \dots & 0 \\ \vdots & \vdots & \vdots & \vdots & \vdots & \ddots & \vdots \\ 0 & 0 & 0 & 0 & 0 & \dots & 1 \end{bmatrix}.$$

$P$  is multiplied by the estimated precision parameters  $\lambda_c$ ,  $\lambda_r$ ,  $\lambda_s$ , and  $\lambda_g$ , thus up-weighting or down-weighting the strength of its penalties and ultimately determining the degree of smoothing at each level. For each of the four precision parameters, we use a truncated flat prior on the standard deviation scale ( $1/\sqrt{\lambda}$ ) as recommended by Gelman.<sup>8</sup> We truncate these priors such that  $\log \lambda \leq 20$  for each of the four  $\lambda$ 's. This upper bound is enforced as a computational convenience: models with  $\log \lambda > 20$  are treated as equivalent to a model with  $\log \lambda = 20$  as they essentially have no extra-linear variability in time. In practice, this upper bound has little effect on the parameter estimates. Furthermore, we order the  $\lambda$ 's a priori:  $\lambda_c < \lambda_r < \lambda_s < \lambda_g$ . This prior constraint conveys the natural expectation that, for example, the global BMI trend has less extra-linear variability than the trend of any given region.

The matrix  $P$  has rank  $T - 2$ , corresponding to a flat, improper prior on the mean and the slope of the  $u_j^c$ 's, the  $u_k^r$ 's, the  $u_l^s$ 's and of  $u^g$ , and is not invertible.<sup>12</sup> Thus, we have a proper prior in a reduced-dimension space as discussed in Rue and Held,<sup>11</sup> with the prior expressed as:

$$P(u_j^c | \lambda_c) \propto \lambda_c^{\frac{T-2}{2}} \exp \left\{ -\frac{\lambda_c}{2} u_j^{c'} P u_j^c \right\}$$

Note that if  $u_j^c$  had a non-zero mean, this would introduce non-identifiability with respect to  $a_j^c$ . By the same token,  $b_j^c$  would not be identified if  $u_j$  had a non-zero time slope. Thus, in order to achieve identifiability of the  $a$ 's,  $b$ 's, and  $u$ 's, we constrain the mean and slope of  $u^g$  and of each  $u^s$ ,  $u^r$ , and  $u^c$  to be zero. Enforcing orthogonality between the linear and non-linear portions of the time trends means that each can be interpreted independently.

In cases where we have observations for at least two different time points, this improper prior will not lead to an improper posterior since the data will provide information about the mean

and slope. However, to enforce the desired orthogonality between the linear and non-linear portions of the model, we constrain the mean and slope of the  $u_j^c$ 's,  $u_k^r$ 's,  $u_l^s$ 's, and of  $u^g$  to be zero, using the approach described by Rue and Held.<sup>11</sup>

For the few countries with no data, we take the Moore-Penrose pseudoinverse<sup>13</sup> of  $P$ , setting to infinity those eigenvalues that correspond to the non-identifiability. This effectively constrains the non-identified portions of the model to zero, as the corresponding variances are set to zero;<sup>10</sup> in this case the Rue and Held correction<sup>11</sup> is not needed. An intermediate case occurs when data are observed for only one time point in a country. In this case, the full conditional precision has rank  $T - 1$  because the mean but not the linear trend of  $u_j^c$  is identified by the data. We thus constrain the linear trend of  $u_j^c$  to zero by taking the generalized inverse of the full conditional precision. We then constrain the mean of  $u_j^c$  to zero using the one-dimensional version of the correction described in Rue and Held.<sup>11</sup>

### 2.3 Age model

The age association of BMI can be non-linear with a plateau or decline in older ages.<sup>14-16</sup> We therefore model age using cubic splines, treating the mid-age of each aggregate age group as a continuous variable. For age group  $h$  with a mid-point at  $z$ , in study  $i$ , the age effect is given by:

$$\gamma_i(z_h) = \gamma_{1i}z_h + \gamma_{2i}z_h^2 + \gamma_{3i}z_h^3 + \gamma_{4i}(z_h - 45)_+^3 + \gamma_{5i}(z_h - 60)_+^3$$

Spline knots are placed at ages 45 and 60 years, based on the age trajectory observed in the data. To reduce dependence among model parameters, we use a middle-aged group, specifically 50-year-olds, as the baseline age. The age effect coefficients ( $\gamma_{p,i}$ ) for each age group mid-age ( $z_h$ ) are given by:



$$\gamma_{p,i} = \psi_p + \phi_p \mu_i + c_{p,j[i]} \quad (\text{where } p = \{1,2,3,4,5\})$$

BMI generally rises more steeply with age where BMI in the baseline age group is higher. In order to allow the shape of the curve to vary with BMI level, the spline coefficients for study  $i$  ( $\gamma_{1,i}, \dots, \gamma_{5,i}$ ) are allowed to depend on  $\mu_i$ , the estimated BMI value for a 50-year-old for that study:

$$\mu_i = a_{j[i]} + b_{j[i]} t_i + \mu_{j[i],t_i} + \mathbf{X}_i \boldsymbol{\beta} + e_i + I_{s,i} [p_{j[i]} + q_{j[i]} t_i + d_i]$$

The age association may also vary across countries beyond what can be explained by differences in country means. We therefore include country-specific random spline coefficients ( $c_{p,j}$ ) in our specification of the  $\gamma$ 's as well:

$$c_{p,j} \sim N(0, \sigma_p^2) \quad (\text{where, } p = \{1,2,3,4,5\})$$

A flat improper prior is placed on each of the five  $\sigma$ 's.

## 2.4 Study-level term and study-specific random effects

Individual studies may deviate from the true country-year mean. We use a study-level term to help account for potential systematic differences associated with data sources that are representative of sub-national and community populations. Our model thus includes time-varying offsets for sub-national and community data in the term  $\mathbf{X}_i \boldsymbol{\beta}$ :

$$\begin{aligned} \mathbf{X}_i \boldsymbol{\beta} = & \beta_1 I \{X_{j[i],t[i]}^{cvg} = \text{subnational}\} + \beta_2 I \{X_{j[i],t[i]}^{cvg} = \text{subnational}\} t_i + \\ & \beta_3 I \{X_{j[i],t[i]}^{cvg} = \text{community}\} + \beta_4 I \{X_{j[i],t[i]}^{cvg} = \text{community}\} t_i \end{aligned}$$

where  $X_{j[i],t[i]}^{cvg}$  is the indicator for whether the coverage of study  $i$ , in country  $j$  and year  $t$ , is sub-national or community.

Even after accounting for sampling variability, national studies may still not reflect the country's true mean BMI level with perfect accuracy, and sub-national and community studies have even larger variability. In study  $i$ , the study-specific random effect  $e_i$  allows all age groups from the same study to have an unusually high or an unusually low mean after conditioning on the other terms in the model. Each  $e_i$  is assigned a normal prior with variance depending on whether study  $i$  is representative at the national, sub-national or community level. Random effects from national studies are constrained to have smaller variance ( $v_n$ ) than random effects of sub-national studies ( $v_s$ ), which are in turn constrained to have smaller variance than community studies ( $v_c$ ). To make country-level predictions, we set  $e_i = 0$ , thus not including random effects due to imperfections in study design and to within-country variability of BMI means.

## 2.5 Residual age-by-study variability

The age patterns across communities within a given country may differ from their country's overall age pattern. This within-study variability cannot be captured by the  $e$ 's, which are equal across age-specific observations in each study, so we include an additional variance component for each study,  $\tau_i^2$ . We again assume that there is less residual variability in national studies than in sub-national and community-level studies, with  $\tau_n^2 < \tau_s^2 < \tau_c^2$ .

## 2.6 Urban and rural strata

To model mean BMI flexibly by urban and rural places of residence, the model incorporates country-specific intercept and slope offsets for the two strata using a centred indicator term

$(I_{s,i})$ :

$$I_{s,i}[p_{j[i]} + q_{j[i]}t_i + d_i] \quad (\text{where, } I_{s,i} = -1 + 2X_{s,i}^{urb})$$

with

$$X_{s,i}^{urb} = \begin{cases} 1, & \text{if stratum } s \text{ contains only urban individuals} \\ 0, & \text{if stratum } s \text{ contains only rural individuals} \\ X_{j[i],t[i]}^{urb} & \text{if stratum } s \text{ contains a mixture of urban and rural individuals} \end{cases}$$

In other words, for data not stratified by place of residence, the model treats the unstratified mean BMI as equivalent to the weighted sum of the (unobserved) urban sample mean BMI and rural sample mean BMI, with the weights based on the proportion of the study country's population living in urban areas in the year of the survey ( $X_{j[i],t[i]}^{urb}$ ).

The intercept ( $p$ ) and slope ( $q$ ) terms capture the country-to-country variation in the magnitude of the BMI difference between urban and rural populations and how the difference changes over time. These are specified with the same geographical hierarchy as the country-specific intercepts ( $a$ ) and slopes ( $b$ ):

$$p_j = p_j^c + p_{k[j]}^r + p_{l[k]}^s + p^g,$$

$$q_j = q_j^c + q_{k[j]}^r + q_{l[k]}^s + q^g,$$

$$p_j^x \sim N(0, \kappa_p^x),$$

$$q_j^x \sim N(0, \kappa_q^x) \quad (\text{where, } x = \{c, r, s\})$$

The study random effect term  $d_i$  incorporates deviations from the country-level urban-rural difference in each study and is analogous to  $e_i$ .

## **2.7 Computation and inference**

The model was fitted with the Markov chain Monte Carlo (MCMC) algorithm, with the sampler programmed using the statistical computing language R (the computer code is available at [www.ncdrisc.org](http://www.ncdrisc.org)). For each sex, the model was run with 25 random starting values, and different seeds for the random number generation in the MCMC algorithm, for 55,000 iterations. Convergence of each model run (referred to as a ‘chain’ hereinafter) was monitored. Within each chain, post-burn-in iterations were thinned to 5,000 draws, which were then combined for all chains and further thinned to a final set of 5,000 draws that each contained the model parameter estimates.

The final set of model parameters was used to obtain 5,000 draws from the posterior distributions of the primary outcomes (mean urban BMI, mean rural BMI and mean urban-rural BMI difference), which allowed inferences to be made for each country-stratum-year-age unit, with parameters that corresponded to a national study; study-specific random effects were set to zero for this purpose. Posterior estimates were made in 1-year age groups for ages 18 and 19 years, 5-year age groups for those aged 20 to 84 years, and for the open-ended age group of 85 years and older.

**Supplementary Table 1.** Data sources used in the analysis.

| Country        | Data years | Survey/study name/citation                                                                              | Level of representative-ness | Rural, urban or both | Age range as used for global analysis |        | Sample size as used for global analysis |        | Note |
|----------------|------------|---------------------------------------------------------------------------------------------------------|------------------------------|----------------------|---------------------------------------|--------|-----------------------------------------|--------|------|
|                |            |                                                                                                         |                              |                      | Male                                  | Female | Male                                    | Female |      |
| Afghanistan    | 2013       | National Nutrition Survey                                                                               | National                     | both                 |                                       | 18-49  |                                         | 12987  | *    |
| Albania        | 2001       | Shapo et al., Public Health Nutr 6:471-77, 2003                                                         | Community                    | urban                | 24+                                   | 24+    | 535                                     | 585    | *    |
| Albania        | 2008-2009  | DHS                                                                                                     | National                     | both                 | 18-49                                 | 18-49  | 2534                                    | 6372   | †    |
| Algeria        | 2003       | STEPS                                                                                                   | Subnational                  | both                 | 25-64                                 | 25-64  | 1612                                    | 2437   | †    |
| Algeria        | 2005       | Transition and Health Impact in North Africa                                                            | National                     | both                 | 35-70                                 | 35-70  | 2004                                    | 2739   | *    |
| Algeria        | 2007-2009  | The ISOR (InSulino-resistance in ORan) study                                                            | Community                    | urban                | 30-64                                 | 30-64  | 378                                     | 409    | *    |
| Algeria        | 2017       | STEPS                                                                                                   | National                     | both                 | 18-69                                 | 18-69  | 2991                                    | 3633   | †    |
| American Samoa | 1990       | McGarvey, Pac Health Dialog 8(1):157-62, 2001                                                           | National                     | both                 | 25+                                   | 25+    | 359                                     | 484    | *    |
| American Samoa | 1992       | McGarvey, Pac Health Dialog 8(1):157-62, 2001                                                           | National                     | both                 | 27+                                   | 27+    | 231                                     | 336    | *    |
| American Samoa | 1994       | McGarvey, Pac Health Dialog 8(1):157-62, 2001                                                           | National                     | both                 | 29+                                   | 29+    | 164                                     | 245    | *    |
| American Samoa | 2004       | STEPS                                                                                                   | National                     | both                 | 25-64                                 | 25-64  | 949                                     | 1060   | †    |
| Argentina      | 1985-1986  | INTERSALT                                                                                               | Community                    | urban                | 20-59                                 | 20-59  | 100                                     | 100    | †    |
| Argentina      | 1995-1998  | de Sereeday et al., Diabetes Metab 30:335-9, 2004                                                       | Subnational                  | urban                | 18-74                                 | 18-74  | 924                                     | 1246   | *    |
| Argentina      | 2003       | CEDES-Programa VIGI+A-Banco Mundial                                                                     | Community                    | urban                | 18-74                                 | 18-74  | 151                                     | 176    | *    |
| Argentina      | 2004-2005  | Cardiovascular Risk factors Multiple Evaluation in Latin America (CARMELA)                              | Community                    | urban                | 25-64                                 | 25-64  | 733                                     | 742    | *    |
| Argentina      | 2005       | Encuesta Nacional de Nutrición y Salud 2005                                                             | National                     | both                 |                                       | 18-49  |                                         | 4803   | *    |
| Argentina      | 2006       | Virasoro Survey                                                                                         | Community                    | urban                | 18-84                                 | 18-84  | 261                                     | 306    | *    |
| Argentina      | 2008-2011  | The VELA Project                                                                                        | Community                    | rural                | 18+                                   | 18+    | 146                                     | 273    | *    |
| Argentina      | 2011       | Primera Encuesta Alimentaria y Nutricional de la Ciudad Autónoma de Buenos Aires - EAN CABA             | Community                    | urban                | 18+                                   | 18+    | 245                                     | 1288   | *    |
| Argentina      | 2011-2012  | CESCAS Study                                                                                            | Community                    | urban                | 35-74                                 | 35-74  | 1584                                    | 2395   | *    |
| Argentina      | 2012-2013  | Primer estudio sobre el estado nutricional y los hábitos alimentarios de la población adulta de Rosario | Community                    | urban                | 18-70                                 | 18-70  | 371                                     | 823    | *    |
| Armenia        | 1998       | The health and nutritional status of children and women in Armenia                                      | National                     | both                 |                                       | 18-45  |                                         | 2397   | *    |
| Armenia        | 2000       | DHS                                                                                                     | National                     | both                 |                                       | 18-49  |                                         | 5264   | †    |
| Armenia        | 2005       | DHS                                                                                                     | National                     | both                 | 18-49                                 | 18-49  | 1025                                    | 5545   | †    |
| Armenia        | 2015-2016  | DHS                                                                                                     | National                     | both                 |                                       | 18-49  |                                         | 5292   | †    |
| Armenia        | 2016       | STEPS                                                                                                   | National                     | both                 | 18-69                                 | 18-69  | 604                                     | 1447   | †    |
| Australia      | 1983       | Risk Factor Prevalence Study                                                                            | National                     | urban                | 25-64                                 | 25-64  | 3731                                    | 3813   | 1*   |
| Australia      | 1988-1989  | Dubbo Study of Australian Elderly                                                                       | Community                    | urban                | 59+                                   | 59+    | 877                                     | 1219   | *    |
| Australia      | 1988-1989  | MONICA, Newcastle                                                                                       | Subnational                  | urban                | 35-64                                 | 35-64  | 672                                     | 671    | †    |
| Australia      | 1988-1989  | MONICA, Newcastle                                                                                       | Community                    | urban                | 25-34                                 | 25-34  | 70                                      | 84     | †    |
| Australia      | 1989       | Risk Factor Prevalence Study                                                                            | National                     | urban                | 20-69                                 | 20-69  | 4497                                    | 4678   | *    |
| Australia      | 1992-1993  | Australia Longitudinal Study of Ageing                                                                  | Community                    | urban                | 65+                                   | 65+    | 814                                     | 746    | *    |
| Australia      | 1994       | MONICA, Newcastle                                                                                       | Subnational                  | urban                | 35-64                                 | 35-64  | 637                                     | 688    | †    |
| Australia      | 1994       | MONICA, Perth inner                                                                                     | Community                    | urban                | 25-64                                 | 25-64  | 363                                     | 349    | †    |
| Australia      | 1994       | MONICA, Perth outer                                                                                     | Community                    | urban                | 25-64                                 | 25-64  | 373                                     | 387    | †    |
| Australia      | 1995       | National Nutrition Survey                                                                               | National                     | both                 | 18+                                   | 18+    | 4864                                    | 5352   | *    |
| Australia      | 1996-1998  | Western Australian AAA Screening Program                                                                | Community                    | urban                | 65-84                                 |        | 12194                                   |        | *    |
| Australia      | 1999-2000  | The Australian Diabetes, Obesity and Lifestyle Study 1999-2000                                          | National                     | both                 | 25+                                   | 25+    | 4991                                    | 6070   | *    |
| Australia      | 1999-2003  | North West Adelaide Health Study                                                                        | Community                    | urban                | 18+                                   | 18+    | 1932                                    | 2122   | *    |
| Australia      | 2000       | Perth children                                                                                          | Community                    | both                 | 25                                    | 25     | 266                                     | 334    | *    |
| Australia      | 2004-2005  | Janus et al., Med J Aust 187:147-52, 2007                                                               | Community                    | rural                | 25-74                                 | 25-74  | 383                                     | 423    | *    |
| Australia      | 2004-2005  | The Australian Diabetes, Obesity and Lifestyle Study 2004-2005                                          | National                     | both                 | 30+                                   | 30+    | 2874                                    | 3472   | *    |
| Australia      | 2004-2006  | North West Adelaide Health Study                                                                        | Community                    | urban                | 20+                                   | 20+    | 1523                                    | 1679   | *    |
| Australia      | 2007-2008  | National Health Survey                                                                                  | National                     | both                 | 18+                                   | 18+    | 5279                                    | 5655   | *    |
| Australia      | 2008-2010  | North West Adelaide Health Study                                                                        | Community                    | urban                | 24+                                   | 24+    | 1168                                    | 1318   | *    |
| Australia      | 2011-2012  | Australian Health Survey                                                                                | National                     | both                 | 18+                                   | 18+    | 9975                                    | 10849  | *    |
| Australia      | 2012       | The Australian Diabetes, Obesity and Lifestyle Study 2012                                               | National                     | both                 | 37+                                   | 37+    | 2048                                    | 2530   | *    |
| Australia      | 2014-2015  | National Health Survey                                                                                  | National                     | both                 | 18+                                   | 18+    | 6653                                    | 7907   | *    |
| Austria        | 1983       | The Austrian Conscription Database                                                                      | National                     | both                 | 18                                    |        | 28094                                   |        | *    |
| Austria        | 1984       | The Austrian Conscription Database                                                                      | National                     | both                 | 18                                    |        | 28202                                   |        | *    |
| Austria        | 1985       | The Austrian Conscription Database                                                                      | National                     | both                 | 18                                    |        | 28938                                   |        | *    |
| Austria        | 1986       | CINDI                                                                                                   | Community                    | both                 | 25-64                                 | 25-64  | 657                                     | 715    | *    |
| Austria        | 1986       | The Austrian Conscription Database                                                                      | National                     | both                 | 18                                    |        | 28923                                   |        | *    |
| Austria        | 1987       | The Austrian Conscription Database                                                                      | National                     | both                 | 18                                    |        | 27534                                   |        | *    |
| Austria        | 1988       | The Austrian Conscription Database                                                                      | National                     | both                 | 18                                    |        | 25185                                   |        | *    |
| Austria        | 1989       | The Austrian Conscription Database                                                                      | National                     | both                 | 18                                    |        | 24628                                   |        | *    |
| Austria        | 1990       | The Austrian Conscription Database                                                                      | National                     | both                 | 18                                    |        | 23826                                   |        | *    |
| Austria        | 1991       | The Austrian Conscription Database                                                                      | National                     | both                 | 18                                    |        | 22453                                   |        | *    |
| Austria        | 1992       | The Austrian Conscription Database                                                                      | National                     | both                 | 18                                    |        | 22127                                   |        | *    |

| Country    | Data years | Survey/study name/citation                                                                                         | Level of representative-ness | Rural, urban or both | Age range as used for global analysis |        | Sample size as used for global analysis |        | Note |
|------------|------------|--------------------------------------------------------------------------------------------------------------------|------------------------------|----------------------|---------------------------------------|--------|-----------------------------------------|--------|------|
|            |            |                                                                                                                    |                              |                      | Male                                  | Female | Male                                    | Female |      |
| Austria    | 1992       | Vorarlberg Health Monitoring and Promotion Programme                                                               | Subnational                  | both                 | 18+                                   | 18+    | 14161                                   | 18835  | *    |
| Austria    | 1993       | The Austrian Conscripton Database                                                                                  | National                     | both                 | 18                                    |        | 21953                                   |        | *    |
| Austria    | 1994       | The Austrian Conscripton Database                                                                                  | National                     | both                 | 18                                    |        | 20846                                   |        | *    |
| Austria    | 1995       | The Austrian Conscripton Database                                                                                  | National                     | both                 | 18                                    |        | 20097                                   |        | *    |
| Austria    | 1996       | The Austrian Conscripton Database                                                                                  | National                     | both                 | 18                                    |        | 19710                                   |        | *    |
| Austria    | 1997       | The Austrian Conscripton Database                                                                                  | National                     | both                 | 18                                    |        | 20526                                   |        | *    |
| Austria    | 1998       | The Austrian Conscripton Database                                                                                  | National                     | both                 | 18                                    |        | 21262                                   |        | *    |
| Austria    | 1998       | Vorarlberg Health Monitoring and Promotion Programme                                                               | Subnational                  | both                 | 18+                                   | 18+    | 16153                                   | 20915  | *    |
| Austria    | 1999       | The Austrian Conscripton Database                                                                                  | National                     | both                 | 18                                    |        | 21591                                   |        | *    |
| Austria    | 2000       | The Austrian Conscripton Database                                                                                  | National                     | both                 | 18                                    |        | 21834                                   |        | *    |
| Austria    | 2001       | The Austrian Conscripton Database                                                                                  | National                     | both                 | 18                                    |        | 21828                                   |        | *    |
| Austria    | 2002       | The Austrian Conscripton Database                                                                                  | National                     | both                 | 18                                    |        | 20909                                   |        | *    |
| Austria    | 2003       | The Austrian Conscripton Database                                                                                  | National                     | both                 | 18                                    |        | 20787                                   |        | *    |
| Austria    | 2004       | The Austrian Conscripton Database                                                                                  | National                     | both                 | 18                                    |        | 20672                                   |        | *    |
| Austria    | 2004       | Vorarlberg Health Monitoring and Promotion Programme                                                               | Subnational                  | both                 | 18+                                   | 18+    | 20160                                   | 23893  | *    |
| Austria    | 2005       | The Austrian Conscripton Database                                                                                  | National                     | both                 | 18                                    |        | 20499                                   |        | *    |
| Austria    | 2006       | The Austrian Conscripton Database                                                                                  | National                     | both                 | 18                                    |        | 21658                                   |        | *    |
| Austria    | 2007       | The Austrian Conscripton Database                                                                                  | National                     | both                 | 18                                    |        | 21405                                   |        | *    |
| Austria    | 2008       | The Austrian Conscripton Database                                                                                  | National                     | both                 | 18                                    |        | 21513                                   |        | *    |
| Austria    | 2009       | The Austrian Conscripton Database                                                                                  | National                     | both                 | 18                                    |        | 22359                                   |        | *    |
| Austria    | 2010       | The Austrian Conscripton Database                                                                                  | National                     | both                 | 18                                    |        | 22180                                   |        | *    |
| Austria    | 2010-2012  | Austrian Study on Nutritional Status 2012                                                                          | National                     | both                 | 18-80                                 | 18-80  | 156                                     | 235    | *    |
| Austria    | 2011       | The Austrian Conscripton Database                                                                                  | National                     | both                 | 18                                    |        | 21763                                   |        | *    |
| Austria    | 2012       | The Austrian Conscripton Database                                                                                  | National                     | both                 | 18                                    |        | 21126                                   |        | *    |
| Austria    | 2013       | The Austrian Conscripton Database                                                                                  | National                     | both                 | 18                                    |        | 20610                                   |        | *    |
| Austria    | 2014       | The Austrian Conscripton Database                                                                                  | National                     | both                 | 18                                    |        | 19907                                   |        | *    |
| Austria    | 2015       | The Austrian Conscripton Database                                                                                  | National                     | both                 | 18                                    |        | 19245                                   |        | *    |
| Austria    | 2016       | The Austrian Conscripton Database                                                                                  | National                     | both                 | 18                                    |        | 18095                                   |        | *    |
| Austria    | 2017       | The Austrian Conscripton Database                                                                                  | National                     | both                 | 18                                    |        | 17285                                   |        | *    |
| Azerbaijan | 1996       | Health and Nutrition Survey                                                                                        | National                     | both                 | 19-59                                 | 19-59  | 121                                     | 295    | *    |
| Azerbaijan | 2001       | Reproductive Health Survey (RHS)                                                                                   | National                     | both                 |                                       | 18-44  |                                         | 1726   | *    |
| Azerbaijan | 2006       | DHS                                                                                                                | National                     | both                 | 18-59                                 | 18-49  | 2208                                    | 7044   | †    |
| Azerbaijan | 2017       | STEPS                                                                                                              | National                     | both                 | 18-69                                 | 18-69  | 1117                                    | 1577   | †    |
| Bahrain    | 1991-1992  | al-Mannai et al., J R Soc Health 116:30-2, 37-40, 1996                                                             | Community                    | both                 | 20+                                   | 20+    | 137                                     | 153    | *    |
| Bahrain    | 1995       | Musaiger et al., Ann Hum Biol 28:346-50, 2001                                                                      | Community                    | both                 | 30+                                   | 30+    | 298                                     | 216    | *    |
| Bahrain    | 1998-1999  | National Nutrition Survey                                                                                          | National                     | both                 | 19+                                   | 19+    | 1120                                    | 1181   | *    |
| Bahrain    | 2001-2004  | Global database on growth and malnutrition of school children and adolescents, WHO                                 | National                     | both                 | 18-19                                 | 18-20  | 100                                     | 102    | *    |
| Bahrain    | 2007       | STEPS                                                                                                              | National                     | both                 | 20-64                                 | 20-64  | 854                                     | 858    | *    |
| Bangladesh | 1992       | Rahman et al., Hypertension 33:74-8, 1999                                                                          | Community                    | rural                | 30+                                   | 30+    | 965                                     | 643    | *    |
| Bangladesh | 1996-1997  | DHS                                                                                                                | National                     | both                 |                                       | 20-49  |                                         | 3384   | †    |
| Bangladesh | 1998       | Zaman et al., J Health Popul Nutr 21:162-63, 2003                                                                  | Community                    | rural                | 20+                                   | 20+    | 290                                     | 379    | *    |
| Bangladesh | 1999-2000  | Hussain et al., Eur J Public Health 17:291-96, 2007                                                                | Community                    | rural                | 20-59                                 | 20-59  | 2037                                    | 2720   | *    |
| Bangladesh | 1999-2000  | DHS                                                                                                                | National                     | both                 |                                       | 20-49  |                                         | 3887   | †    |
| Bangladesh | 2000-2004  | Nutritional Surveillance Project                                                                                   | National                     | rural                |                                       | 18-45  |                                         | 224251 | *    |
| Bangladesh | 2002       | STEPS                                                                                                              | National                     | both                 | 25-64                                 | 25-64  | 5619                                    | 5775   | *    |
| Bangladesh | 2004       | DHS                                                                                                                | National                     | both                 |                                       | 20-49  |                                         | 9165   | †    |
| Bangladesh | 2007       | DHS                                                                                                                | National                     | both                 |                                       | 20-49  |                                         | 9037   | †    |
| Bangladesh | 2011       | DHS                                                                                                                | National                     | both                 | 18+                                   | 20+    | 5250                                    | 16679  | †    |
| Bangladesh | 2014       | DHS                                                                                                                | National                     | both                 |                                       | 20-49  |                                         | 14963  | †    |
| Bangladesh | 2015       | An assessment of BRAC Health Nutrition and Population Programme and benchmark survey of Sustainable Development Go | National                     | rural                | 35+                                   | 18+    | 5432                                    | 16132  | *    |
| Barbados   | 1987-1992  | Barbados Eye Study                                                                                                 | National                     | both                 | 40-84                                 | 40-84  | 1980                                    | 2627   | *    |
| Barbados   | 1991-1994  | Cooper et al., Am J Public Health 87(2):160-68, 1997                                                               | Community                    | urban                | 25-100                                | 25-100 | 329                                     | 482    | *    |
| Barbados   | 1997-2002  | The Barbados Incidence Studies of Eye Diseases II                                                                  | National                     | both                 | 40-84                                 | 40-84  | 1004                                    | 1441   | *    |
| Barbados   | 1999-2000  | The Survey on Health, Well-Being, and Aging in Latin America and the Caribbean (SABE)                              | Community                    | urban                | 60+                                   | 60+    | 559                                     | 866    | 2†   |
| Barbados   | 2011-2013  | Health of the Nation (HotN)                                                                                        | National                     | both                 | 25+                                   | 25+    | 455                                     | 703    | *    |
| Belarus    | 2016       | STEPS                                                                                                              | National                     | both                 | 18-69                                 | 18-69  | 2085                                    | 2894   | †    |
| Belgium    | 1984-1985  | Belgian Interuniversity Research on Nutrition and Health                                                           | National                     | both                 | 25-74                                 | 25-74  | 5897                                    | 5289   | *    |
| Belgium    | 1985-1986  | INTERSALT, Ghent                                                                                                   | Community                    | urban                | 20-59                                 | 20-59  | 100                                     | 100    | †    |
| Belgium    | 1985-1987  | INTERSALT, Charleroi                                                                                               | Community                    | urban                | 20-59                                 | 20-59  | 82                                      | 75     | †    |

| Country                | Data years | Survey/study name/citation                                                             | Level of representative-ness | Rural, urban or both | Age range as used for global analysis |        | Sample size as used for global analysis |        | Note |
|------------------------|------------|----------------------------------------------------------------------------------------|------------------------------|----------------------|---------------------------------------|--------|-----------------------------------------|--------|------|
|                        |            |                                                                                        |                              |                      | Male                                  | Female | Male                                    | Female |      |
| Belgium                | 1985-1987  | MONICA, Charleroi                                                                      | Community                    | urban                | 25-64                                 | 25-64  | 347                                     | 327    | †    |
| Belgium                | 1985-1987  | MONICA, Ghent                                                                          | Community                    | urban                | 25-64                                 | 25-64  | 549                                     | 459    | †    |
| Belgium                | 1985-1990  | Flemish Study on Environment, Genes and Health Outcomes                                | Community                    | rural                | 20-90                                 | 20-90  | 656                                     | 692    | *    |
| Belgium                | 1987-1990  | MONICA, Charleroi                                                                      | Community                    | urban                | 25-64                                 | 25-64  | 325                                     | 301    | †    |
| Belgium                | 1988-1990  | MONICA, Ghent                                                                          | Community                    | urban                | 25-64                                 | 25-64  | 456                                     | 449    | †    |
| Belgium                | 1990-1992  | MONICA, Ghent                                                                          | Community                    | urban                | 25-64                                 | 25-64  | 507                                     | 475    | †    |
| Belgium                | 1990-1993  | MONICA, Charleroi                                                                      | Community                    | urban                | 25-64                                 | 25-64  | 337                                     | 332    | †    |
| Belgium                | 1991-1994  | Flemish Study on Environment, Genes and Health Outcomes                                | Community                    | rural                | 26-88                                 | 26-88  | 393                                     | 416    | *    |
| Belgium                | 1992-1995  | Flemish Study on Environment, Genes and Health Outcomes                                | Community                    | rural                | 27-89                                 | 27-89  | 298                                     | 312    | *    |
| Belgium                | 1994-1996  | BIRNH Elderly: Belgian Interuniversity Research on Nutrition and Health in the Elderly | National                     | both                 | 65-89                                 | 65-89  | 1142                                    | 953    | *    |
| Belgium                | 1996-1998  | Flemish Study on Environment, Genes and Health Outcomes                                | Community                    | rural                | 18-84                                 | 18-84  | 354                                     | 347    | *    |
| Belgium                | 1998       | Flemish Study on Environment, Genes and Health Outcomes                                | Community                    | rural                | 32-86                                 | 32-86  | 320                                     | 359    | *    |
| Belgium                | 1998-2000  | Flemish Study on Environment, Genes and Health Outcomes                                | Community                    | rural                | 18-80                                 | 18-80  | 198                                     | 196    | *    |
| Belgium                | 1999-2001  | Flemish Study on Environment, Genes and Health Outcomes                                | Community                    | rural                | 18-81                                 | 18-81  | 213                                     | 227    | *    |
| Belgium                | 2001       | Flemish Study on Environment, Genes and Health Outcomes                                | Community                    | rural                | 18-78                                 | 18-78  | 230                                     | 208    | *    |
| Belgium                | 2002-2003  | Flemish Study on Environment, Genes and Health Outcomes                                | Community                    | rural                | 18-81                                 | 18-81  | 169                                     | 181    | *    |
| Belgium                | 2002-2004  | SPAH                                                                                   | Subnational                  | both                 | 18-75                                 | 18-75  | 2595                                    | 2308   | *    |
| Belgium                | 2002-2005  | Flemish Study on Environment, Genes and Health Outcomes                                | Community                    | rural                | 18-88                                 | 18-88  | 391                                     | 404    | *    |
| Belgium                | 2003       | The European Male Ageing Study                                                         | Community                    | both                 | 40+                                   |        | 433                                     |        | *    |
| Belgium                | 2005-2008  | Flemish Study on Environment, Genes and Health Outcomes                                | Community                    | rural                | 18-89                                 | 18-89  | 449                                     | 456    | *    |
| Belgium                | 2008       | The European Male Ageing Study                                                         | Community                    | both                 | 40+                                   |        | 383                                     |        | *    |
| Belgium                | 2009-2013  | Flemish Study on Environment, Genes and Health Outcomes                                | Community                    | rural                | 20-88                                 | 20-88  | 330                                     | 335    | *    |
| Belgium                | 2010-2015  | Flemish Study on Environment, Genes and Health Outcomes                                | Community                    | rural                | 18-87                                 | 18-87  | 388                                     | 410    | *    |
| Belgium                | 2014-2015  | Food Consumption Survey                                                                | National                     | urban                | 18-64                                 | 18-64  | 611                                     | 633    | *    |
| Belize                 | 2004-2005  | CAMDI                                                                                  | National                     | both                 | 20+                                   | 20+    | 599                                     | 1018   | *    |
| Benin                  | 1996       | DHS                                                                                    | National                     | both                 |                                       | 20-49  |                                         | 2137   | †    |
| Benin                  | 2001       | DHS                                                                                    | National                     | both                 |                                       | 18-49  |                                         | 4787   | †    |
| Benin                  | 2006       | DHS                                                                                    | National                     | both                 |                                       | 18-49  |                                         | 13293  | †    |
| Benin                  | 2007       | STEPS                                                                                  | Community                    | urban                | 25-64                                 | 25-64  | 955                                     | 1508   | †    |
| Benin                  | 2008       | STEPS                                                                                  | National                     | both                 | 25-64                                 | 25-64  | 3430                                    | 3365   | †    |
| Benin                  | 2011-2012  | DHS                                                                                    | National                     | both                 |                                       | 18-49  |                                         | 12833  | †    |
| Benin                  | 2015       | STEPS                                                                                  | National                     | both                 | 18-69                                 | 18-69  | 2304                                    | 2543   | †    |
| Bhutan                 | 2007       | STEPS                                                                                  | Community                    | urban                | 25-74                                 | 25-74  | 1125                                    | 1322   | †    |
| Bhutan                 | 2014       | STEPS                                                                                  | National                     | both                 | 18-69                                 | 18-69  | 1069                                    | 1674   | †    |
| Bolivia                | 1994       | DHS                                                                                    | National                     | both                 |                                       | 20-49  |                                         | 2128   | †    |
| Bolivia                | 1998       | DHS                                                                                    | National                     | both                 |                                       | 20-49  |                                         | 3939   | †    |
| Bolivia                | 2003       | DHS                                                                                    | National                     | both                 |                                       | 18-49  |                                         | 13974  | †    |
| Bolivia                | 2005-2007  | Baya Botti et al., Nutr Hosp 24(3):304-11, 2009                                        | National                     | both                 | 18                                    | 18     | 137                                     | 131    | *    |
| Bolivia                | 2008       | DHS                                                                                    | National                     | both                 |                                       | 18-49  |                                         | 13497  | †    |
| Bosnia and Herzegovina | 2002       | Non-communicable disease risk factor survey, Federation of B&H                         | Subnational                  | both                 | 25-64                                 | 25-64  | 1118                                    | 1613   | *    |
| Bosnia and Herzegovina | 2012       | Non-communicable disease risk factor survey, Federation of B&H                         | Subnational                  | both                 | 18+                                   | 18+    | 1782                                    | 1971   | *    |
| Botswana               | 2007       | STEPS                                                                                  | National                     | both                 | 25-64                                 | 25-64  | 1243                                    | 2577   | †    |
| Botswana               | 2014       | STEPS                                                                                  | National                     | both                 | 18-69                                 | 18-69  | 1236                                    | 2500   | †    |
| Brazil                 | 1989       | Pesquisa Nacional sobre Saude e Nutricao                                               | National                     | both                 | 18+                                   | 18+    | 16783                                   | 17897  | *    |
| Brazil                 | 1990-1991  | Fornes et al., Rev Saude Publica 36:12-8, 2002                                         | Community                    | urban                | 20+                                   | 20+    | 432                                     | 613    | *    |
| Brazil                 | 1991-1993  | EPIDOSO                                                                                | Community                    | urban                | 65+                                   | 65+    | 269                                     | 473    | *    |
| Brazil                 | 1992-1998  | Moraes et al., Int J Cardiol 90:205-11, 2003                                           | Community                    | urban                | 18+                                   | 18+    | 438                                     | 543    | *    |
| Brazil                 | 1995       | Health and Nutrition Survey of Rio de Janeiro                                          | Community                    | urban                | 60+                                   | 60+    | 248                                     | 385    | *    |
| Brazil                 | 1995-1996  | Cohort study from Porto Alegre                                                         | Community                    | urban                | 18+                                   | 18+    | 489                                     | 596    | *    |
| Brazil                 | 1996       | DHS                                                                                    | National                     | both                 |                                       | 20-49  |                                         | 2884   | †    |
| Brazil                 | 1996-1997  | The Bambui Cohort Study of Ageing                                                      | Community                    | urban                | 18+                                   | 18+    | 931                                     | 1335   | *    |
| Brazil                 | 1997       | PPV                                                                                    | Subnational                  | both                 | 20+                                   | 20+    | 8063                                    | 9121   | *    |
| Brazil                 | 1998       | Belo Horizonte Heart Study                                                             | Community                    | urban                | 18-19                                 | 18-19  | 31                                      | 43     | *    |
| Brazil                 | 1999-2000  | Pelotas cross-sectional survey                                                         | Community                    | urban                | 20-69                                 | 20-69  | 839                                     | 1096   | *    |
| Brazil                 | 1999-2000  | The Survey on Health, Well-Being, and Aging in Latin America and the Caribbean (SABE)  | Community                    | urban                | 60+                                   | 60+    | 732                                     | 1064   | 2†   |
| Brazil                 | 2000       | The 1982 Pelotas (Brazil) Birth Cohort: 18 years follow-up                             | Community                    | urban                | 18                                    |        | 2228                                    |        | *    |
| Brazil                 | 2001       | de Freitas et al., Arq Bras Cardiol 88:191-99, 2007                                    | Community                    | urban                | 18+                                   | 18+    | 310                                     | 331    | *    |
| Brazil                 | 2001       | The 1982 Pelotas (Brazil) Birth Cohort: 19 years follow-up                             | Community                    | urban                |                                       | 19     |                                         | 919    | *    |
| Brazil                 | 2001-2003  | Bustos et al., Nutr Metab Cardiovasc Dis 17:581-89, 2007                               | Community                    | both                 | 22-28                                 | 22-28  | 992                                     | 1064   | *    |



| Country           | Data years | Survey/study name/citation                                                                      | Level of representative-ness | Rural, urban or both | Age range as used for global analysis |        | Sample size as used for global analysis |        | Note |
|-------------------|------------|-------------------------------------------------------------------------------------------------|------------------------------|----------------------|---------------------------------------|--------|-----------------------------------------|--------|------|
|                   |            |                                                                                                 |                              |                      | Male                                  | Female | Male                                    | Female |      |
| Brazil            | 2002-2003  | Pesquisa de Orcamentos Familiares                                                               | National                     | both                 | 18+                                   | 18+    | 55681                                   | 56389  | *    |
| Brazil            | 2002-2004  | Ribeira Preto Birth Cohort                                                                      | Community                    | urban                | 22-25                                 | 22-25  | 1012                                    | 1082   | *    |
| Brazil            | 2003       | PNAFS                                                                                           | Community                    | urban                | 20+                                   | 20+    | 1155                                    | 1941   | *    |
| Brazil            | 2003       | Women health in Southern Brazil                                                                 | Community                    | urban                |                                       | 20-60  |                                         | 986    | *    |
| Brazil            | 2003-2005  | São Paulo Health and Ageing Study                                                               | Community                    | urban                | 65+                                   | 65+    | 783                                     | 1198   | *    |
| Brazil            | 2004       | Caju and Virgem das Graças                                                                      | Community                    | rural                | 18+                                   | 18+    | 291                                     | 286    | *    |
| Brazil            | 2004-2005  | The 1982 Pelotas (Brazil) Birth Cohort: 23 years follow-up                                      | Community                    | urban                | 23                                    | 23     | 2173                                    | 1935   | *    |
| Brazil            | 2004-2006  | Hearts of Brazil                                                                                | National                     | urban                | 18+                                   | 18+    | 550                                     | 626    | *    |
| Brazil            | 2006       | Krause et al., J Aging Phys Act 17:387-97, 2009                                                 | Community                    | urban                | 60+                                   | 60+    | 93                                      | 1069   | *    |
| Brazil            | 2006       | ATITUDE                                                                                         | Subnational                  | both                 | 18-21                                 | 18-21  | 1314                                    | 1714   | *    |
| Brazil            | 2006       | Pesquisa Nacional de Demografia e Saude 2006                                                    | National                     | both                 |                                       | 18-49  |                                         | 13375  | *    |
| Brazil            | 2006-2007  | SOFT study                                                                                      | Community                    | urban                | 18+                                   | 18+    | 739                                     | 1099   | *    |
| Brazil            | 2008       | The Bambui Cohort Study of Ageing                                                               | Community                    | urban                | 71+                                   | 71+    | 248                                     | 456    | *    |
| Brazil            | 2008       | Caju & Virgen das Gracas                                                                        | Community                    | rural                | 18+                                   | 18+    | 273                                     | 287    | *    |
| Brazil            | 2008-2009  | Pesquisa de Orcamentos Familiares                                                               | National                     | both                 | 18+                                   | 18+    | 62035                                   | 65695  | *    |
| Brazil            | 2009-2010  | EpiFloripa Cohort Study of Ageing - Wave 1                                                      | Community                    | urban                | 60+                                   | 60+    | 592                                     | 1047   | *    |
| Brazil            | 2010       | San Pedro                                                                                       | Community                    | rural                | 18+                                   | 18+    | 153                                     | 214    | *    |
| Brazil            | 2010-2015  | Baependi Heart Study                                                                            | Community                    | urban                | 18+                                   | 18+    | 780                                     | 1125   | *    |
| Brazil            | 2011       | ATITUDE                                                                                         | Subnational                  | both                 | 18-19                                 | 18-19  | 687                                     | 839    | *    |
| Brazil            | 2011       | Pregnancy in adolescence in municipalities of small size in the northeast of Brazil             | Community                    | both                 | 18-19                                 | 18-19  | 112                                     | 118    | *    |
| Brazil            | 2011-2012  | The 1993 Pelotas (Brazil) Birth Cohort: 18 years follow-up                                      | Community                    | urban                | 18-19                                 | 18-19  | 1953                                    | 1993   | *    |
| Brazil            | 2012-2013  | The 1982 Pelotas (Brazil) Birth Cohort: 30 years follow-up                                      | Community                    | urban                | 30                                    | 30     | 1753                                    | 1798   | *    |
| Brazil            | 2012-2013  | Prevalence of Leptin Polymorphism Gln223Arg                                                     | Community                    | urban                | 18+                                   | 18+    | 282                                     | 523    | *    |
| Brazil            | 2013       | Pesquisas Nacional de Saude                                                                     | National                     | both                 | 18+                                   | 18+    | 24918                                   | 32351  | †    |
| Brazil            | 2013-2014  | EpiFloripa Cohort Study of Ageing - Wave 2                                                      | Community                    | urban                | 63+                                   | 63+    | 404                                     | 744    | *    |
| Brazil            | 2014       | Brazilian Guide to the Physical Fitnees related to Health Assessment and Lifestyle Habits       | Community                    | urban                | 18-19                                 | 18-19  | 73                                      | 45     | *    |
| Brazil            | 2014-2015  | EpiFloripa Adults Cohort Study                                                                  | Community                    | urban                | 25-65                                 | 25-65  | 353                                     | 476    | *    |
| Brazil            | 2015-2016  | The 1993 Pelotas (Brazil) Birth Cohort: 22-23 years follow-up                                   | Community                    | urban                | 21-23                                 | 21-23  | 1687                                    | 1872   | *    |
| Brazil            | 2016-2017  | Study in Presidente Prudente                                                                    | Community                    | urban                | 18+                                   | 18+    | 314                                     | 502    | *    |
| Brunei Darussalam | 2010-2011  | National Health And Nutritional Status Survey (NHANSS)                                          | National                     | both                 | 18-75                                 | 18-75  | 708                                     | 847    | *    |
| Brunei Darussalam | 2015-2016  | National Non-Communicable Diseases Survey (NNCDS)                                               | National                     | both                 | 18-69                                 | 18-69  | 814                                     | 1075   | *    |
| Bulgaria          | 2004       | National Nutrition Survey                                                                       | National                     | both                 | 18+                                   | 18+    | 515                                     | 515    | *    |
| Burkina Faso      | 1992-1993  | DHS                                                                                             | National                     | both                 |                                       | 20-49  |                                         | 3190   | †    |
| Burkina Faso      | 1998-1999  | DHS                                                                                             | National                     | both                 |                                       | 20-49  |                                         | 3114   | †    |
| Burkina Faso      | 2002       | Vulnérabilité Alimentaire et Sécurité Nutritionnelle dans la Gnagna (VASN-Gnagna)               | Subnational                  | rural                | 18+                                   | 18+    | 733                                     | 2663   | *    |
| Burkina Faso      | 2003       | DHS                                                                                             | National                     | both                 |                                       | 18-49  |                                         | 9360   | †    |
| Burkina Faso      | 2004       | Ouedraogo et al., Public Health Nutr 11:1280-87, 2008                                           | Community                    | urban                | 35+                                   | 35+    | 956                                     | 1066   | *    |
| Burkina Faso      | 2010       | DHS                                                                                             | National                     | both                 |                                       | 18-49  |                                         | 6730   | †    |
| Burkina Faso      | 2013       | STEPS                                                                                           | National                     | both                 | 25-64                                 | 25-64  | 2223                                    | 2250   | †    |
| Burundi           | 2010       | DHS                                                                                             | National                     | both                 |                                       | 18-49  |                                         | 3471   | †    |
| Burundi           | 2016-2017  | DHS                                                                                             | National                     | both                 |                                       | 18-49  |                                         | 6651   | †    |
| Cabo Verde        | 2007       | STEPS                                                                                           | National                     | both                 | 25-64                                 | 25-64  | 658                                     | 1066   | †    |
| Cambodia          | 2000       | DHS                                                                                             | National                     | both                 |                                       | 18-49  |                                         | 5888   | †    |
| Cambodia          | 2005       | DHS                                                                                             | National                     | both                 |                                       | 18-49  |                                         | 6952   | †    |
| Cambodia          | 2008       | Anthropometrics Survey                                                                          | National                     | both                 |                                       | 18-49  |                                         | 5955   | *    |
| Cambodia          | 2010       | DHS                                                                                             | National                     | both                 |                                       | 18-49  |                                         | 7650   | †    |
| Cambodia          | 2010       | STEPS                                                                                           | National                     | both                 | 25-64                                 | 25-64  | 1881                                    | 3344   | †    |
| Cambodia          | 2014       | DHS                                                                                             | National                     | both                 |                                       | 18-49  |                                         | 9686   | †    |
| Cameroon          | 1998       | DHS                                                                                             | National                     | both                 |                                       | 20-49  |                                         | 1429   | †    |
| Cameroon          | 1998-1999  | ENHIP                                                                                           | Community                    | both                 | 18+                                   | 18+    | 921                                     | 1237   | *    |
| Cameroon          | 2003       | STEPS                                                                                           | Subnational                  | urban                | 18+                                   | 18+    | 3331                                    | 4991   | †    |
| Cameroon          | 2004       | DHS                                                                                             | National                     | both                 |                                       | 18-49  |                                         | 3924   | †    |
| Cameroon          | 2007       | Cameroon Burden of Diabetes - Second Survey                                                     | Subnational                  | urban                | 18+                                   | 18+    | 3122                                    | 4123   | *    |
| Cameroon          | 2009       | National Survey of Micronutrient Status and Consumption of Fortifiable Foods                    | National                     | both                 |                                       | 18-49  |                                         | 788    | *    |
| Cameroon          | 2011       | DHS                                                                                             | National                     | both                 |                                       | 18-49  |                                         | 6281   | †    |
| Cameroon          | 2014-2015  | Cardiovascular risk factors screening in urban and rural areas in the Far-North Region Cameroon | Subnational                  | both                 | 20+                                   | 20+    | 520                                     | 369    | *    |
| Canada            | 1985-1986  | INTER-SALT, St Johns                                                                            | Community                    | urban                | 20-59                                 | 20-59  | 100                                     | 100    | †    |
| Canada            | 1985-1988  | MONICA, Halifax                                                                                 | Community                    | both                 | 25-64                                 | 25-64  | 438                                     | 420    | †    |
| Canada            | 1986-1992  | Canada Heart Health Survey                                                                      | National                     | both                 | 18-74                                 | 18-74  | 8789                                    | 8877   | *    |

| Country                  | Data years | Survey/study name/citation                                                            | Level of representative-ness | Rural, urban or both | Age range as used for global analysis |        | Sample size as used for global analysis |        | Note |
|--------------------------|------------|---------------------------------------------------------------------------------------|------------------------------|----------------------|---------------------------------------|--------|-----------------------------------------|--------|------|
|                          |            |                                                                                       |                              |                      | Male                                  | Female | Male                                    | Female |      |
| Canada                   | 1991-1992  | Canadian Study of Health and Aging                                                    | Community                    | both                 | 70+                                   | 70+    | 236                                     | 348    | *    |
| Canada                   | 1993       | Chen et al., Int J Obes Relat Metab Disord 22:771-77, 1998                            | Community                    | rural                | 18-74                                 | 18-74  | 803                                     | 988    | *    |
| Canada                   | 1995       | MONICA, Halifax                                                                       | Community                    | both                 | 25-64                                 | 25-64  | 274                                     | 287    | †    |
| Canada                   | 1995-1997  | Canadian Multicentre Osteoporosis Study (CaMos)                                       | Subnational                  | both                 | 25+                                   | 25+    | 2610                                    | 6332   | *    |
| Canada                   | 1996       | Canadian Study of Health and Aging                                                    | Community                    | both                 | 70+                                   | 70+    | 236                                     | 348    | *    |
| Canada                   | 1997       | PEI Nutrition Survey                                                                  | Subnational                  | both                 | 18-74                                 | 18-74  | 1000                                    | 995    | *    |
| Canada                   | 2005       | CCHS                                                                                  | National                     | both                 | 18+                                   | 18+    | 1684                                    | 2031   | *    |
| Canada                   | 2005-2008  | Canadian Multicentre Osteoporosis Study (CaMos)                                       | Subnational                  | both                 | 35+                                   | 35+    | 1486                                    | 3661   | *    |
| Canada                   | 2007-2009  | Canadian Health Measures Survey, Cycle 1                                              | National                     | both                 | 18-79                                 | 18-79  | 1744                                    | 1947   | *    |
| Canada                   | 2008       | CCHS                                                                                  | National                     | both                 | 18+                                   | 18+    | 1689                                    | 1988   | *    |
| Canada                   | 2009-2011  | Canadian Health Measures Survey, Cycle 2                                              | National                     | both                 | 18-79                                 | 18-79  | 1785                                    | 2047   | *    |
| Canada                   | 2012-2013  | Canadian Health Measures Survey, Cycle 3                                              | National                     | both                 | 18-79                                 | 18-79  | 1666                                    | 1688   | *    |
| Canada                   | 2014-2015  | Canadian Health Measures Survey, Cycle 4                                              | National                     | both                 | 18-79                                 | 18-79  | 1683                                    | 1669   | *    |
| Central African Republic | 1994-1995  | DHS                                                                                   | National                     | both                 |                                       | 20-49  |                                         | 1760   | †    |
| Central African Republic | 2010       | STEPS                                                                                 | Subnational                  | both                 | 25-64                                 | 25-64  | 1846                                    | 1967   | †    |
| Chad                     | 1996-1997  | DHS                                                                                   | National                     | both                 |                                       | 20-49  |                                         | 3262   | †    |
| Chad                     | 2004       | DHS                                                                                   | National                     | both                 |                                       | 20-49  |                                         | 2618   | †    |
| Chad                     | 2008       | STEPS                                                                                 | Community                    | urban                | 25-64                                 | 25-64  | 995                                     | 845    | †    |
| Chad                     | 2014-2015  | DHS                                                                                   | National                     | both                 |                                       | 18-49  |                                         | 8369   | †    |
| Chile                    | 1989       | INCLEN                                                                                | Community                    | urban                | 35-65                                 |        | 199                                     |        | *    |
| Chile                    | 1992-1993  | Miquel et al., Gastroenterology 115:937-46, 1998                                      | Community                    | urban                | 18+                                   | 18+    | 657                                     | 1031   | *    |
| Chile                    | 1999-2000  | The Survey on Health, Well-Being, and Aging in Latin America and the Caribbean (SABE) | Community                    | urban                | 60+                                   | 60+    | 410                                     | 806    | 2†   |
| Chile                    | 2000       | Nervi et al., J Hepatol 45:299-305, 2006                                              | Community                    | urban                | 18+                                   | 18+    | 335                                     | 624    | *    |
| Chile                    | 2001-2003  | Bustos et al., Nutr Metab Cardiovasc Dis 17:581-89, 2007                              | Community                    | both                 | 22-28                                 | 22-28  | 436                                     | 562    | *    |
| Chile                    | 2003       | Encuesta Nacional de Salud                                                            | National                     | both                 | 18+                                   | 18+    | 1545                                    | 1849   | *    |
| Chile                    | 2004-2005  | Cardiovascular Risk factors Multiple Evaluation in Latin America (CARMELA)            | Community                    | urban                | 25-64                                 | 25-64  | 783                                     | 865    | *    |
| Chile                    | 2005       | Palomo et al., Rev Med Chil 135:904-12, 2007                                          | Community                    | urban                | 18-74                                 | 18-74  | 339                                     | 668    | *    |
| Chile                    | 2009-2010  | Encuesta Nacional de Salud                                                            | National                     | both                 | 18+                                   | 18+    | 1830                                    | 2773   | *    |
| Chile                    | 2011-2012  | CESCAS Study                                                                          | Community                    | urban                | 35-74                                 | 35-74  | 922                                     | 1027   | *    |
| Chile                    | 2016-2017  | Encuesta Nacional de Salud                                                            | National                     | both                 | 18+                                   | 18+    | 1878                                    | 3315   | *    |
| China                    | 1982       | China National Nutrition Survey                                                       | National                     | both                 | 18+                                   | 18+    | 8920                                    | 8755   | 1*   |
| China                    | 1984-1985  | Sino-MONICA Beijing                                                                   | Subnational                  | both                 | 25-64                                 | 25-64  | 813                                     | 857    | †    |
| China                    | 1985       | Chinese National Surveys on Students Constitution and Health                          | National                     | both                 | 18                                    | 18     | 16847                                   | 16596  | *    |
| China                    | 1986       | INTERSALT, Beijing                                                                    | Community                    | urban                | 20-59                                 | 20-59  | 100                                     | 100    | †    |
| China                    | 1986       | INTERSALT, Nanning                                                                    | Community                    | urban                | 20-59                                 | 20-59  | 100                                     | 100    | †    |
| China                    | 1986       | INTERSALT, Tianjin                                                                    | Community                    | urban                | 20-59                                 | 20-59  | 100                                     | 100    | †    |
| China                    | 1986-1989  | Wang et al., Zhonghua Liu Xing Bing Xue Za Zhi 26:394-9, 2005                         | Community                    | both                 | 45-64                                 |        | 18244                                   |        | *    |
| China                    | 1986-1989  | Sino-MONICA Shanghai                                                                  | Subnational                  | rural                | 25-64                                 | 25-64  | 675                                     | 753    | *    |
| China                    | 1987       | INCLEN                                                                                | Community                    | urban                | 35-65                                 |        | 989                                     |        | *    |
| China                    | 1988       | Sino-MONICA Hebei                                                                     | Subnational                  | both                 | 25-64                                 |        | 800                                     |        | *    |
| China                    | 1988       | Sino-MONICA Heilongjiang                                                              | Subnational                  | urban                | 25-64                                 | 25-64  | 800                                     | 800    | *    |
| China                    | 1988       | Sino-MONICA Henan                                                                     | Subnational                  | urban                | 25-64                                 | 25-64  | 345                                     | 427    | *    |
| China                    | 1988       | Sino-MONICA Neimenggu                                                                 | Subnational                  | urban                | 25-64                                 | 25-64  | 396                                     | 400    | *    |
| China                    | 1988       | Sino-MONICA Sichuan                                                                   | Subnational                  | both                 | 25-64                                 | 25-64  | 312                                     | 334    | *    |
| China                    | 1988       | Sino-MONICA Shandong                                                                  | Subnational                  | urban                | 25-64                                 | 25-64  | 211                                     | 225    | *    |
| China                    | 1988-1989  | Wang et al., Zhonghua Liu Xing Bing Xue Za Zhi 24:272-75, 2003                        | Community                    | both                 | 25-64                                 | 25-64  | 873                                     | 731    | *    |
| China                    | 1988-1989  | Sino-MONICA Beijing                                                                   | Subnational                  | both                 | 25-64                                 | 25-64  | 701                                     | 862    | *    |
| China                    | 1988-1989  | Sino-MONICA Jilin                                                                     | Subnational                  | urban                | 25-64                                 | 25-64  | 380                                     | 400    | *    |
| China                    | 1988-1989  | Sino-MONICA Jiangxi                                                                   | Subnational                  | urban                | 25-64                                 | 25-64  | 379                                     | 386    | *    |
| China                    | 1988-1989  | Sino-MONICA Liaoning                                                                  | Subnational                  | both                 | 25-64                                 | 25-64  | 728                                     | 734    | *    |
| China                    | 1988-1990  | East Beijing Study 2                                                                  | Community                    | urban                | 20-84                                 | 20-84  | 135                                     | 148    | *    |
| China                    | 1989       | The Tianjin Project                                                                   | Community                    | urban                | 18-64                                 | 18-64  | 3894                                    | 3971   | *    |
| China                    | 1989       | China Health and Nutrition Study                                                      | National                     | both                 | 18-45                                 | 18-45  | 2356                                    | 2549   | 3†   |
| China                    | 1989       | Sino-MONICA Fujian                                                                    | Subnational                  | urban                | 25-64                                 | 25-64  | 179                                     | 191    | *    |
| China                    | 1989       | Sino-MONICA Jiangsu                                                                   | Subnational                  | rural                | 25-64                                 | 25-64  | 398                                     | 399    | *    |
| China                    | 1990-1991  | China Prospective Study                                                               | National                     | both                 | 40-79                                 |        | 230676                                  |        | *    |
| China                    | 1991       | Hua et al., Zhonghua Nei Ke Za Zhi 36:18-20, 1997                                     | Community                    | rural                | 60+                                   | 60+    | 288                                     | 335    | *    |
| China                    | 1991       | China National Hypertension Survey Epidemiology Follow-up Study                       | National                     | both                 | 40+                                   | 40+    | 75696                                   | 79040  | *    |
| China                    | 1991       | China Health and Nutrition Study                                                      | National                     | both                 | 18+                                   | 18+    | 4047                                    | 4470   | 3†   |

| Country | Data years | Survey/study name/citation                                              | Level of representative-ness | Rural, urban or both | Age range as used for global analysis |        | Sample size as used for global analysis |         | Note |
|---------|------------|-------------------------------------------------------------------------|------------------------------|----------------------|---------------------------------------|--------|-----------------------------------------|---------|------|
|         |            |                                                                         |                              |                      | Male                                  | Female | Male                                    | Female  |      |
| China   | 1991       | Sino-MONICA Shanghai                                                    | Subnational                  | rural                | 30-64                                 | 30-64  | 564                                     | 624     | *    |
| China   | 1991-1992  | Fangshan Cohort Study                                                   | Community                    | urban                | 34-86                                 | 34-86  | 871                                     | 1736    | *    |
| China   | 1992       | Huashan Study                                                           | Community                    | urban                | 35-75                                 | 35-75  | 892                                     | 965     | *    |
| China   | 1992       | China National Nutrition Survey                                         | National                     | both                 | 18+                                   | 18+    | 23925                                   | 27306   | *    |
| China   | 1992       | Sino-MONICA Sichuan                                                     | Subnational                  | both                 | 25-64                                 | 25-64  | 608                                     | 526     | *    |
| China   | 1992-1993  | Anzhen 02 Cohort Study                                                  | Community                    | urban                | 34-65                                 | 34-65  | 2032                                    | 2120    | *    |
| China   | 1993       | Wang et al., Zhonghua Liu Xing Bing Xue Za Zhi 24:272-75, 2003          | Community                    | both                 | 25-64                                 | 25-64  | 822                                     | 617     | *    |
| China   | 1993       | China Health and Nutrition Study                                        | National                     | both                 | 18+                                   | 18+    | 3864                                    | 4235    | 3†   |
| China   | 1993       | Sino-MONICA Anhui                                                       | Subnational                  | urban                | 25-64                                 | 25-64  | 193                                     | 195     | *    |
| China   | 1993       | Sino-MONICA Beijing                                                     | Subnational                  | both                 | 25-64                                 | 25-64  | 613                                     | 816     | *    |
| China   | 1993       | Sino-MONICA Jiangsu                                                     | Subnational                  | urban                | 25-64                                 | 25-64  | 462                                     | 365     | *    |
| China   | 1993       | Sino-MONICA Liaoning                                                    | Subnational                  | both                 | 25-64                                 | 25-64  | 493                                     | 500     | *    |
| China   | 1995       | Chinese National Surveys on Students Constitution and Health            | National                     | both                 | 18                                    | 18     | 8651                                    | 8454    | *    |
| China   | 1996       | Wang et al., Zhonghua Liu Xing Bing Xue Za Zhi 24:272-75, 2003          | Community                    | both                 | 25-64                                 | 25-64  | 735                                     | 721     | *    |
| China   | 1996       | The Tianjin Project                                                     | Community                    | urban                | 18-64                                 | 18-64  | 722                                     | 717     | *    |
| China   | 1996-2000  | Shanghai Women's Health Study                                           | Community                    | urban                |                                       | 40-70  |                                         | 74915   | *    |
| China   | 1996-2003  | Wu et al., Osteoporos Int 15:751-59, 2004                               | Community                    | urban                |                                       | 18+    |                                         | 3418    | *    |
| China   | 1997       | China Health and Nutrition Study                                        | National                     | both                 | 18+                                   | 18+    | 4164                                    | 4401    | 3†   |
| China   | 1997       | INTERMAP, Beijing                                                       | Community                    | rural                | 40-59                                 | 40-59  | 133                                     | 139     | †    |
| China   | 1997       | INTERMAP, Guangxi                                                       | Community                    | rural                | 40-59                                 | 40-59  | 140                                     | 138     | †    |
| China   | 1997       | INTERMAP, Shanxi                                                        | Community                    | rural                | 40-59                                 | 40-59  | 143                                     | 146     | †    |
| China   | 1998       | Shanghai Diabetes Study                                                 | Community                    | urban                | 25+                                   | 25+    | 1264                                    | 1768    | *    |
| China   | 1998-2000  | Jia et al., Obes Rev 3:157-65, 2002                                     | Community                    | urban                | 20+                                   | 20+    | 1106                                    | 1670    | *    |
| China   | 1999       | Chen et al., Zhonghua Yi Xue Za Zhi 85(40):2830-4, 2005                 | Subnational                  | both                 | 35-85                                 | 35-85  | 13549                                   | 10315   | *    |
| China   | 1999       | Wang et al., Zhonghua Liu Xing Bing Xue Za Zhi 24:272-75, 2003          | Community                    | both                 | 25-64                                 | 25-64  | 818                                     | 685     | *    |
| China   | 1999-2000  | Xu et al., Public Health Nutr 8:47-51, 2005                             | Community                    | both                 | 35+                                   | 35+    | 18194                                   | 18902   | *    |
| China   | 2000       | China Health and Nutrition Study                                        | National                     | both                 | 18+                                   | 18+    | 4515                                    | 4934    | 3†   |
| China   | 2000       | Chinese National Surveys on Students Constitution and Health            | National                     | both                 | 18                                    | 18     | 9085                                    | 9162    | *    |
| China   | 2000-2001  | The International Collaborative Study of Cardiovascular Disease in ASIA | National                     | both                 | 35-74                                 | 35-74  | 7512                                    | 8006    | *    |
| China   | 2001       | Shanghai Diabetes Study                                                 | Community                    | urban                | 25+                                   | 25+    | 1264                                    | 1768    | *    |
| China   | 2002       | Ma et al., Zhonghua Liu Xing Bing Xue Za Zhi 25:1035-8, 2004            | Subnational                  | both                 | 18+                                   | 18+    | 7352                                    | 7352    | *    |
| China   | 2002       | China National Nutrition and Health Survey                              | National                     | both                 | 18+                                   | 18+    | 64630                                   | 75015   | *    |
| China   | 2002-2003  | Fan et al., J Gastroenterol Hepatol 20:1825-32, 2005                    | Community                    | urban                | 18+                                   | 18-74  | 5502                                    | 7767    | *    |
| China   | 2002-2006  | Shanghai Men's Health Study                                             | Community                    | urban                | 40-74                                 |        | 61445                                   |         | *    |
| China   | 2004       | Tian et al., Prev Med 48:59-63, 2009                                    | Community                    | rural                | 18+                                   | 18+    | 1022669                                 | 1163313 | *    |
| China   | 2004       | Beijing Child and Adolescent Metabolic Syndrome study                   | Community                    | both                 | 18                                    | 18     | 248                                     | 258     | *    |
| China   | 2004       | China Health and Nutrition Study                                        | National                     | both                 | 18+                                   | 18+    | 4345                                    | 4750    | 3†   |
| China   | 2004-2005  | Xinjiang Children and Adolescent Survey                                 | Community                    | urban                | 18                                    | 18     | 115                                     | 123     | *    |
| China   | 2004-2006  | Pang et al., Intern Med 47:893-97, 2008                                 | Community                    | rural                | 35+                                   | 35+    | 22963                                   | 22962   | *    |
| China   | 2004-2006  | Shanghai Women's Health Study                                           | Community                    | urban                |                                       | 45-80  |                                         | 64545   | *    |
| China   | 2004-2008  | China Kadoorie Biobank baseline survey                                  | Subnational                  | both                 | 35-74                                 | 35-74  | 205011                                  | 295708  | †    |
| China   | 2004-2008  | Shanghai Men's Health Study                                             | Community                    | urban                | 41-80                                 |        | 54800                                   |         | *    |
| China   | 2005       | Ye et al., J Am Coll Cardiol 49:1798-805, 2007                          | Community                    | urban                | 50-70                                 | 50-70  | 743                                     | 906     | *    |
| China   | 2005       | Chinese National Surveys on Students Constitution and Health            | National                     | both                 | 18                                    | 18     | 10117                                   | 10190   | *    |
| China   | 2005-2006  | Zhou et al., World J Gastroenterol 13:6419-24, 2007                     | Community                    | urban                | 18-79                                 | 18-79  | 1101                                    | 2063    | *    |
| China   | 2006       | Beijing Eye Study                                                       | Community                    | both                 | 45+                                   | 45+    | 1394                                    | 1820    | *    |
| China   | 2006       | China Health and Nutrition Study                                        | National                     | both                 | 18+                                   | 18+    | 4250                                    | 4781    | 3†   |
| China   | 2007       | Beijing Child and Adolescent Metabolic Syndrome study                   | Community                    | urban                | 18                                    | 18     | 20                                      | 18      | *    |
| China   | 2007-2008  | China National Diabetes & Metabolic Disorders Study                     | National                     | both                 | 20+                                   | 20+    | 18419                                   | 27820   | *    |
| China   | 2007-2010  | SAGE                                                                    | National                     | both                 | 50+                                   | 50+    | 5759                                    | 6616    | †    |
| China   | 2007-2011  | Shanghai Women's Health Study                                           | Community                    | urban                |                                       | 47-83  |                                         | 52116   | *    |
| China   | 2008       | China Health and Retirement Longitudinal Study (CHARLS), pilot survey   | Subnational                  | both                 | 45+                                   | 45+    | 923                                     | 950     | †    |
| China   | 2008-2010  | Fangshan Family-based Ischemic Stroke Study in China (FISSIC) program   | Community                    | rural                | 40+                                   | 40+    | 19478                                   | 36449   | *    |
| China   | 2008-2011  | Shanghai Men's Health Study                                             | Community                    | urban                | 43-84                                 |        | 51948                                   |         | *    |
| China   | 2009       | China Health and Nutrition Study                                        | National                     | both                 | 18+                                   | 18+    | 4489                                    | 4936    | 3†   |
| China   | 2010       | China Noncommunicable Disease Surveillance                              | National                     | both                 | 18+                                   | 18+    | 45066                                   | 53452   | *    |
| China   | 2010       | Chinese National Surveys on Students Constitution and Health            | National                     | both                 | 18                                    | 18     | 8965                                    | 8923    | *    |
| China   | 2011       | Beijing Children Eye Study                                              | Community                    | both                 | 18                                    | 18     | 615                                     | 588     | *    |
| China   | 2011       | Beijing Eye Study                                                       | Community                    | both                 | 50+                                   | 50+    | 1467                                    | 1895    | *    |

| Country               | Data years | Survey/study name/citation                                                                   | Level of representative-ness | Rural, urban or both | Age range as used for global analysis |        | Sample size as used for global analysis |        | Note |
|-----------------------|------------|----------------------------------------------------------------------------------------------|------------------------------|----------------------|---------------------------------------|--------|-----------------------------------------|--------|------|
|                       |            |                                                                                              |                              |                      | Male                                  | Female | Male                                    | Female |      |
| China                 | 2011       | China Health and Nutrition Study                                                             | National                     | both                 | 18+                                   | 18+    | 5885                                    | 6646   | 3†   |
| China                 | 2011-2012  | China Health and Retirement Longitudinal Study (CHARLS), baseline survey                     | National                     | both                 | 45+                                   | 45+    | 6337                                    | 7003   | †    |
| China                 | 2012       | Beijing High School Eye Students Study                                                       | Community                    | both                 | 18                                    | 18     | 352                                     | 370    | *    |
| China                 | 2012       | China Health and Retirement Longitudinal Study (CHARLS), wave 2 pilot survey                 | Subnational                  | both                 | 45+                                   | 45+    | 777                                     | 856    | †    |
| China                 | 2012       | Shandong Children Study                                                                      | Community                    | both                 | 18                                    | 18     | 57                                      | 44     | *    |
| China                 | 2012-2013  | The Kailuan Study                                                                            | Community                    | urban                | 18+                                   | 18+    | 80921                                   | 21385  | *    |
| China                 | 2012-2015  | Shanghai Men's Health Study                                                                  | Community                    | urban                | 47-87                                 |        | 40921                                   |        | *    |
| China                 | 2012-2015  | Shanghai Women's Health Study                                                                | Community                    | urban                |                                       | 52-88  |                                         | 49592  | *    |
| China                 | 2013       | China Health and Retirement Longitudinal Study (CHARLS), wave 2 survey                       | National                     | both                 | 45+                                   | 45+    | 5898                                    | 6582   | *    |
| China                 | 2013       | Gobi Desert Children Eye Study                                                               | Community                    | urban                | 18-21                                 | 18-21  | 28                                      | 25     | *    |
| China                 | 2014       | Shanghai Municipal Surveys on Students Constitution and Health                               | Community                    | both                 | 18                                    | 18     | 404                                     | 395    | *    |
| China                 | 2014-2015  | The Kailuan Study                                                                            | Community                    | urban                | 18+                                   | 18+    | 73161                                   | 18280  | *    |
| China                 | 2016       | Greater Beijing School Children Myopia Study                                                 | Subnational                  | both                 | 18                                    | 18     | 628                                     | 638    | *    |
| China (Hong Kong SAR) | 1985-1986  | Shatin New Town Study                                                                        | Community                    | urban                | 70+                                   | 70+    | 276                                     | 669    | *    |
| China (Hong Kong SAR) | 1991       | The Hong Kong study on health, health risk and quality of life in the Chinese elderly cohort | Community                    | both                 | 70+                                   | 70+    | 943                                     | 944    | *    |
| China (Hong Kong SAR) | 1995-1996  | Hong Kong Cardiovascular Risk Factor Prevalence Study 1995-1996                              | National                     | both                 | 25-74                                 | 25-74  | 1412                                    | 1478   | *    |
| China (Hong Kong SAR) | 2005-2006  | Hong Kong Growth Survey                                                                      | National                     | both                 | 18-19                                 | 18-19  | 920                                     | 951    | *    |
| Colombia              | 1986       | INTERSALT                                                                                    | Community                    | rural                | 20-59                                 | 20-59  | 96                                      | 95     | †    |
| Colombia              | 1995       | DHS                                                                                          | National                     | both                 |                                       | 20-49  |                                         | 3068   | †    |
| Colombia              | 2000       | DHS                                                                                          | National                     | both                 |                                       | 20-49  |                                         | 2929   | †    |
| Colombia              | 2001       | CINDI/CARMEN - Bucaramaga                                                                    | Community                    | urban                | 18-74                                 | 18-74  | 627                                     | 1218   | *    |
| Colombia              | 2002       | CINDI/CARMEN - Bogota                                                                        | Community                    | urban                | 18-74                                 | 18-74  | 322                                     | 570    | *    |
| Colombia              | 2004-2005  | Cardiovascular Risk factors Multiple Evaluation in Latin America (CAMELA)                    | Community                    | urban                | 25-64                                 | 25-64  | 738                                     | 812    | *    |
| Colombia              | 2005       | DHS                                                                                          | National                     | both                 | 18-64                                 | 18-64  | 25093                                   | 38617  | †    |
| Colombia              | 2005       | Encuesta Nacional de Situacion Nutricional                                                   | National                     | both                 |                                       | 18-49  |                                         | 2783   | *    |
| Colombia              | 2007       | Encuesta Nacional de Salud                                                                   | National                     | both                 | 18-69                                 | 18-69  | 5462                                    | 7686   | *    |
| Colombia              | 2010       | DHS                                                                                          | National                     | both                 | 18-64                                 | 18-64  | 39544                                   | 51623  | †    |
| Colombia              | 2010       | STEPS                                                                                        | Subnational                  | both                 | 18-64                                 | 18-64  | 922                                     | 1239   | *    |
| Colombia              | 2015       | STEPS                                                                                        | Subnational                  | both                 | 18-64                                 | 18-64  | 867                                     | 1142   | *    |
| Comoros               | 1996       | DHS                                                                                          | National                     | both                 |                                       | 20-49  |                                         | 744    | †    |
| Comoros               | 2011       | STEPS                                                                                        | National                     | both                 | 25-64                                 | 25-64  | 1541                                    | 3505   | †    |
| Comoros               | 2012       | DHS                                                                                          | National                     | both                 |                                       | 18-49  |                                         | 4105   | †    |
| Congo                 | 1986       | Enquête Brazzaville 1986                                                                     | Community                    | urban                |                                       | 18-50  |                                         | 935    | *    |
| Congo                 | 1987       | Maire et al., Rev Epidemiol Sante Publique 40:252-58, 1992                                   | Community                    | rural                |                                       | 18-45  |                                         | 750    | *    |
| Congo                 | 1987       | Enquête Nationale Congo 1987                                                                 | National                     | rural                |                                       | 18-49  |                                         | 1264   | *    |
| Congo                 | 1991       | Enquête Brazzaville 1991                                                                     | Community                    | urban                | 18-90                                 | 18-90  | 1200                                    | 1806   | *    |
| Congo                 | 1996       | Enquête Brazzaville 1996                                                                     | Community                    | urban                | 18-90                                 | 18-90  | 1346                                    | 1818   | *    |
| Congo                 | 2004       | STEPS                                                                                        | Community                    | urban                | 25-64                                 | 25-64  | 1013                                    | 956    | †    |
| Congo                 | 2005       | DHS                                                                                          | National                     | both                 |                                       | 18-49  |                                         | 5390   | †    |
| Congo                 | 2011-2012  | DHS                                                                                          | National                     | both                 |                                       | 18-49  |                                         | 4415   | †    |
| Cook Islands          | 2003       | STEPS                                                                                        | National                     | both                 | 25-64                                 | 25-64  | 925                                     | 958    | †    |
| Cook Islands          | 2013-2015  | STEPS                                                                                        | National                     | both                 | 18-64                                 | 18-64  | 456                                     | 469    | †    |
| Costa Rica            | 2004       | CAMDI                                                                                        | Community                    | urban                | 20+                                   | 20+    | 304                                     | 624    | *    |
| Costa Rica            | 2004-2006  | Costa Rican Longevity and Healthy Aging Study Pre-1945 Cohort Wave 1                         | National                     | both                 | 60+                                   | 60+    | 1163                                    | 1346   | †    |
| Costa Rica            | 2006-2008  | Costa Rican Longevity and Healthy Aging Study Pre-1945 Cohort Wave 2                         | National                     | both                 | 62+                                   | 62+    | 944                                     | 1102   | †    |
| Costa Rica            | 2008-2009  | Encuesta Nacional de Nutrición 2008-2009                                                     | National                     | both                 |                                       | 45+    |                                         | 661    | *    |
| Costa Rica            | 2009-2010  | Costa Rican Longevity and Healthy Aging Study Pre-1945 Cohort Wave 3                         | National                     | both                 | 64+                                   | 64+    | 737                                     | 887    | †    |
| Costa Rica            | 2010       | Costa Rican National Cardiovascular Risk Factors Survey, 2010                                | National                     | both                 | 20+                                   | 20+    | 778                                     | 1958   | *    |
| Costa Rica            | 2010-2011  | Costa Rican Longevity and Healthy Aging Study 1945-1955 Cohort Wave 1                        | National                     | both                 | 54-66                                 | 54-66  | 1058                                    | 1676   | †    |
| Costa Rica            | 2012-2014  | Costa Rican Longevity and Healthy Aging Study 1945-1955 Cohort Wave 2                        | National                     | both                 | 56-68                                 | 56-68  | 867                                     | 1470   | †    |
| Cote d'Ivoire         | 1994       | DHS                                                                                          | National                     | both                 |                                       | 20-49  |                                         | 2682   | †    |
| Cote d'Ivoire         | 1998-1999  | DHS                                                                                          | National                     | both                 |                                       | 18-49  |                                         | 2278   | †    |
| Cote d'Ivoire         | 2005       | STEPS                                                                                        | Subnational                  | both                 | 18-64                                 | 18-64  | 1834                                    | 2255   | †    |
| Cote d'Ivoire         | 2011-2012  | DHS                                                                                          | National                     | both                 |                                       | 18-49  |                                         | 4023   | †    |
| Croatia               | 1997-1999  | Budak A et al., Lijec Vjesn 125(1-2):32-5, 2003                                              | National                     | both                 | 25-100                                | 25-100 | 1763                                    | 2684   | *    |
| Croatia               | 2003-2004  | School Health Survey                                                                         | National                     | both                 | 18-19                                 | 18-19  | 71                                      | 21     | *    |
| Croatia               | 2005       | Endemic Nephropathy and Arterial hypertension (ENAH)                                         | Subnational                  | rural                | 18+                                   | 18+    | 264                                     | 367    | *    |
| Croatia               | 2006-2008  | The Cardiovascular risk factors in school age – intervention model development               | National                     | both                 | 18-20                                 | 18-20  | 190                                     | 202    | *    |
| Croatia               | 2008       | Endemic Nephropathy and Arterial hypertension (ENAH)                                         | Subnational                  | rural                | 18+                                   | 18+    | 331                                     | 527    | *    |

| Country            | Data years | Survey/study name/citation                                                                                  | Level of representative-ness | Rural, urban or both | Age range as used for global analysis |        | Sample size as used for global analysis |        | Note |
|--------------------|------------|-------------------------------------------------------------------------------------------------------------|------------------------------|----------------------|---------------------------------------|--------|-----------------------------------------|--------|------|
|                    |            |                                                                                                             |                              |                      | Male                                  | Female | Male                                    | Female |      |
| Croatia            | 2010       | Endemic Nephropathy and Arterial hypertension (ENAH)                                                        | Subnational                  | rural                | 18+                                   | 18+    | 252                                     | 393    | *    |
| Croatia            | 2015       | Endemic Nephropathy and Arterial hypertension (ENAH) Follow-up Study                                        | Subnational                  | rural                | 18+                                   | 18+    | 224                                     | 460    | *    |
| Cuba               | 1999-2000  | The Survey on Health, Well-Being, and Aging in Latin America and the Caribbean (SABE)                       | Community                    | urban                | 60+                                   | 60+    | 630                                     | 1044   | 2†   |
| Cuba               | 2001-2002  | National Survey of Risk Factors                                                                             | National                     | both                 | 20-60                                 | 20-60  | 11426                                   | 11426  | *    |
| Cuba               | 2010       | National Risk Factor Survey                                                                                 | National                     | both                 | 18+                                   | 18+    | 3200                                    | 3732   | *    |
| Cuba               | 2011       | Non-communicable disease risk factor in Cienfuegos                                                          | Community                    | urban                | 18-80                                 | 18-80  | 594                                     | 849    | *    |
| Cyprus             | 1999-2000  | Countrywide Integrated Noncommunicable Diseases Intervention (CINDI) Programme                              | National                     | both                 | 25-65                                 | 25-65  | 457                                     | 546    | *    |
| Cyprus             | 2007-2008  | Asthma Study Cyprus                                                                                         | National                     | both                 | 18                                    | 18     | 12                                      | 22     | *    |
| Czech Republic     | 1985       | Czech-MONICA                                                                                                | National                     | both                 | 25-64                                 | 25-64  | 1243                                    | 1303   | †    |
| Czech Republic     | 1988       | Czech-MONICA                                                                                                | National                     | both                 | 25-64                                 | 25-64  | 1357                                    | 1408   | †    |
| Czech Republic     | 1992       | Czech-MONICA                                                                                                | National                     | both                 | 25-64                                 | 25-64  | 1131                                    | 1207   | †    |
| Czech Republic     | 1997-1998  | Czech post-MONICA                                                                                           | National                     | both                 | 25-64                                 | 25-64  | 1526                                    | 1665   | *    |
| Czech Republic     | 2000-2001  | Czech post-MONICA                                                                                           | National                     | both                 | 25-64                                 | 25-64  | 1629                                    | 1691   | *    |
| Czech Republic     | 2001       | 6th nationwide anthropological survey of children and adolescents 2001                                      | National                     | both                 | 18-19                                 | 18-20  | 1050                                    | 1794   | *    |
| Czech Republic     | 2002-2005  | Health, Alcohol and Psychosocial factors In Eastern Europe (HAPIEE)                                         | Subnational                  | urban                | 45-69                                 | 45-69  | 3247                                    | 3888   | *    |
| Czech Republic     | 2006-2009  | Czech post-MONICA                                                                                           | National                     | both                 | 25-64                                 | 25-64  | 1717                                    | 1858   | *    |
| Czech Republic     | 2015-2018  | Czech post-MONICA                                                                                           | National                     | both                 | 25-65                                 | 25-65  | 1241                                    | 1366   | *    |
| Denmark            | 1982       | The Danish Conscription Database                                                                            | National                     | both                 | 18-26                                 |        | 1184                                    |        | 1*   |
| Denmark            | 1983       | The Danish Conscription Database                                                                            | National                     | both                 | 18-26                                 |        | 761                                     |        | 1*   |
| Denmark            | 1984       | The Danish Conscription Database                                                                            | National                     | both                 | 18-26                                 |        | 378                                     |        | 1*   |
| Denmark            | 1984-1985  | The Epidemiology of Gallstones in a 70 Year-Old Danish Population                                           | Community                    | both                 | 70                                    | 70     | 202                                     | 172    | *    |
| Denmark            | 1985       | INTERSALT                                                                                                   | Community                    | urban                | 20-59                                 | 20-59  | 99                                      | 100    | †    |
| Denmark            | 1986-1987  | MONICA, Glostrup                                                                                            | Community                    | urban                | 29-61                                 | 29-61  | 746                                     | 753    | †    |
| Denmark            | 1987       | Nilsson et al., J Intern Med 237:479-86, 1995                                                               | Community                    | urban                | 51                                    |        | 439                                     |        | *    |
| Denmark            | 1991-1992  | MONICA, Glostrup                                                                                            | Community                    | urban                | 29-61                                 | 29-61  | 808                                     | 816    | †    |
| Denmark            | 1992-1994  | Obesity Research Group-Copenhagen City Heart Study 3                                                        | Subnational                  | both                 | 33-73                                 |        | 922                                     |        | *    |
| Denmark            | 1993-1997  | EPIC Aarhus                                                                                                 | Community                    | urban                | 50-65                                 | 50-65  | 8430                                    | 8717   | *    |
| Denmark            | 1993-1997  | EPIC Copenhagen                                                                                             | Community                    | urban                | 50-65                                 | 50-65  | 18729                                   | 21133  | *    |
| Denmark            | 1996-1997  | Drivsholm et al., Diabet Med 18:126-32, 2001                                                                | Subnational                  | urban                | 60                                    | 60     | 325                                     | 370    | *    |
| Denmark            | 2002-2003  | Odense Androgen Study                                                                                       | Community                    | urban                | 20-29                                 |        | 783                                     |        | *    |
| Denmark            | 2006       | Danish Conscript Register                                                                                   | National                     | both                 | 18-26                                 |        | 24901                                   |        | *    |
| Denmark            | 2006-2008  | The Health2006 Cohort                                                                                       | Community                    | urban                | 18-71                                 | 18-71  | 1553                                    | 1916   | *    |
| Denmark            | 2007       | Danish Conscript Register                                                                                   | National                     | both                 | 18-26                                 |        | 26999                                   |        | *    |
| Denmark            | 2007-2008  | The Danish Health Examination Survey 2007-2008                                                              | National                     | both                 | 18+                                   | 18+    | 7349                                    | 10651  | *    |
| Denmark            | 2008       | Danish Conscript Register                                                                                   | National                     | both                 | 18-26                                 |        | 24153                                   |        | *    |
| Denmark            | 2009       | Danish Conscript Register                                                                                   | National                     | both                 | 18-26                                 |        | 26663                                   |        | *    |
| Denmark            | 2009-2010  | The European Youth Heart Study                                                                              | Community                    | both                 | 18-28                                 | 18-28  | 305                                     | 332    | *    |
| Denmark            | 2010       | Danish Conscript Register                                                                                   | National                     | both                 | 18-26                                 |        | 30522                                   |        | *    |
| Denmark            | 2011       | Danish Conscript Register                                                                                   | National                     | both                 | 18-26                                 |        | 30480                                   |        | *    |
| Denmark            | 2011-2012  | The Health2006 cohort - 5-year follow-up                                                                    | Community                    | urban                | 24-76                                 | 24-76  | 1057                                    | 1249   | *    |
| Denmark            | 2012       | Danish Conscript Register                                                                                   | National                     | both                 | 18-26                                 |        | 29438                                   |        | *    |
| Denmark            | 2012-2015  | The Danish study of Functional Disorders (DanFunD)                                                          | Subnational                  | urban                | 18-72                                 | 18-72  | 3451                                    | 4034   | *    |
| Denmark            | 2013       | Danish Conscript Register                                                                                   | National                     | both                 | 18-26                                 |        | 30379                                   |        | *    |
| Denmark            | 2014       | Danish Conscript Register                                                                                   | National                     | both                 | 18-26                                 |        | 32206                                   |        | *    |
| Denmark            | 2015       | Danish Conscript Register                                                                                   | National                     | both                 | 18-26                                 |        | 28751                                   |        | *    |
| Dominica           | 2007       | STEPS                                                                                                       | National                     | both                 | 18-64                                 | 18-64  | 417                                     | 526    | †    |
| Dominican Republic | 1991       | DHS                                                                                                         | National                     | both                 |                                       | 20-49  |                                         | 1965   | †    |
| Dominican Republic | 1993       | Aono et al., J Epidemiol 7(4):238-43, 1997                                                                  | National                     | both                 | 20-70                                 | 20-70  | 767                                     | 1149   | *    |
| Dominican Republic | 1996       | DHS                                                                                                         | National                     | both                 |                                       | 18-49  |                                         | 6431   | †    |
| Dominican Republic | 1996-1998  | Estudio factores de riesgo cardiovascular y sindrome metabolico en la Republica Dominicana I (EFRICARD I)   | National                     | both                 | 18-75                                 | 18-75  | 2087                                    | 4095   | *    |
| Dominican Republic | 2010-2011  | Estudio factores de riesgo cardiovascular y sindrome metabolico en la Republica Dominicana II (EFRICARD II) | National                     | both                 | 18-75                                 | 18-75  | 1641                                    | 3254   | *    |
| Dominican Republic | 2013       | DHS                                                                                                         | National                     | both                 | 18-59                                 | 18-49  | 9281                                    | 7906   | †    |
| DR Congo           | 2001       | Multiple Indicator Cluster Survey Round 2                                                                   | National                     | both                 |                                       | 18-49  |                                         | 5398   | *    |
| DR Congo           | 2005       | STEPS                                                                                                       | Subnational                  | urban                | 18+                                   | 18+    | 677                                     | 1031   | †    |
| DR Congo           | 2007       | DHS                                                                                                         | National                     | both                 |                                       | 18-49  |                                         | 3612   | †    |
| DR Congo           | 2013-2014  | DHS                                                                                                         | National                     | both                 |                                       | 18-49  |                                         | 7034   | †    |
| Ecuador            | 2004       | Encuesta Demografica y de Salud Materno e Infantil/Reproductive Health Survey                               | National                     | both                 |                                       | 18-49  |                                         | 3757   | †    |
| Ecuador            | 2004-2005  | CArdiovascular Risk factors Multiple Evaluation in Latin America (CARMELA)                                  | Community                    | urban                | 25-64                                 | 25-64  | 813                                     | 814    | *    |
| Ecuador            | 2009       | National Survey of Health, Wellbeing, and Aging                                                             | National                     | both                 | 60+                                   | 60+    | 2341                                    | 2592   | 2†   |

| Country           | Data years | Survey/study name/citation                                            | Level of representative-ness | Rural, urban or both | Age range as used for global analysis |        | Sample size as used for global analysis |        | Note |
|-------------------|------------|-----------------------------------------------------------------------|------------------------------|----------------------|---------------------------------------|--------|-----------------------------------------|--------|------|
|                   |            |                                                                       |                              |                      | Male                                  | Female | Male                                    | Female |      |
| Ecuador           | 2011-2013  | Encuesta Nacional de Salud y Nutrición                                | National                     | both                 | 18-59                                 | 18-59  | 13188                                   | 17272  | *    |
| Egypt             | 1992       | DHS                                                                   | National                     | both                 |                                       | 20-49  |                                         | 4654   | †    |
| Egypt             | 1995       | DHS                                                                   | National                     | both                 |                                       | 20-49  |                                         | 6499   | †    |
| Egypt             | 2000       | DHS                                                                   | National                     | both                 |                                       | 20-49  |                                         | 13602  | †    |
| Egypt             | 2002       | National Survey of Smoking, Obesity, Blood Pressure and Blood Glucose | National                     | both                 | 18+                                   | 18+    | 2913                                    | 3643   | *    |
| Egypt             | 2003       | DHS                                                                   | National                     | both                 |                                       | 20-49  |                                         | 7930   | †    |
| Egypt             | 2003-2004  | Marzouk et al., Gut 56(8):1105-10, 2007                               | Community                    | rural                | 25+                                   | 25+    | 322                                     | 456    | *    |
| Egypt             | 2005       | DHS                                                                   | National                     | both                 |                                       | 20-49  |                                         | 16864  | †    |
| Egypt             | 2005       | STEPS                                                                 | National                     | both                 | 18-65                                 | 18-65  | 4271                                    | 4033   | †    |
| Egypt             | 2007-2009  | Mostafa et al., Gut 59(8):1135-40, 2010                               | Community                    | rural                | 35+                                   | 35+    | 642                                     | 843    | *    |
| Egypt             | 2008       | DHS                                                                   | National                     | both                 | 18-59                                 | 20-49  | 6480                                    | 15242  | †    |
| Egypt             | 2011       | STEPS                                                                 | National                     | both                 | 18-65                                 | 18-65  | 1659                                    | 2844   | †    |
| Egypt             | 2014       | DHS                                                                   | National                     | both                 |                                       | 20-49  |                                         | 18891  | †    |
| Egypt             | 2015       | DHS                                                                   | National                     | both                 | 18-59                                 | 18-59  | 6459                                    | 7623   | †    |
| Egypt             | 2017       | STEPS                                                                 | National                     | both                 | 18-69                                 | 18-69  | 2092                                    | 3615   | †    |
| El Salvador       | 2002-2003  | Ecuesta Nacional de Salud Familiar                                    | National                     | both                 |                                       | 18-49  |                                         | 3748   | †    |
| El Salvador       | 2004       | CAMDI                                                                 | Community                    | urban                | 20+                                   | 20+    | 396                                     | 811    | *    |
| El Salvador       | 2008       | Ecuesta Nacional de Salud Familiar                                    | National                     | both                 |                                       | 18-49  |                                         | 6282   | †    |
| Equatorial Guinea | 2011       | DHS                                                                   | National                     | both                 |                                       | 18-49  |                                         | 1074   | *    |
| Eritrea           | 1995       | DHS                                                                   | National                     | both                 |                                       | 18-49  |                                         | 1621   | *    |
| Eritrea           | 2002       | DHS                                                                   | National                     | both                 |                                       | 18-49  |                                         | 3223   | *    |
| Eritrea           | 2004       | STEPS                                                                 | National                     | both                 | 18-64                                 | 18-64  | 1044                                    | 1027   | †    |
| Eritrea           | 2010       | STEPS                                                                 | National                     | both                 | 25-74                                 | 25-74  | 1712                                    | 4285   | †    |
| Estonia           | 1984-1986  | Abina et al., Blood Press 12:111-21, 2003                             | Community                    | urban                | 20-54                                 | 30-54  | 2477                                    | 851    | *    |
| Estonia           | 1992-1994  | Abina et al., Blood Press 12:111-21, 2003                             | Community                    | urban                | 20-54                                 | 20-54  | 921                                     | 678    | *    |
| Estonia           | 1997       | Pomerleau et al., Public Health Nutr 3:3-10, 2000                     | National                     | both                 | 19-64                                 | 19-64  | 525                                     | 628    | *    |
| Estonia           | 1999-2001  | Abina et al., Blood Press 12:111-21, 2003                             | Community                    | urban                | 20-54                                 | 20-54  | 635                                     | 692    | *    |
| Estonia           | 2002       | Estonian Biobank                                                      | National                     | both                 | 18+                                   | 18+    | 89                                      | 217    | *    |
| Estonia           | 2003       | Estonian Biobank                                                      | National                     | both                 | 18+                                   | 18+    | 2695                                    | 5688   | *    |
| Estonia           | 2003       | The European Male Ageing Study                                        | Community                    | both                 | 40+                                   |        | 416                                     |        | *    |
| Estonia           | 2004       | Estonian Biobank                                                      | National                     | both                 | 18+                                   | 18+    | 281                                     | 496    | *    |
| Estonia           | 2007       | Estonian Biobank                                                      | National                     | both                 | 18+                                   | 18+    | 965                                     | 2129   | *    |
| Estonia           | 2008       | Estonian Biobank                                                      | National                     | both                 | 18+                                   | 18+    | 4991                                    | 10688  | *    |
| Estonia           | 2008       | The European Male Ageing Study                                        | Community                    | both                 | 40+                                   |        | 305                                     |        | *    |
| Estonia           | 2009       | Estonian Biobank                                                      | National                     | both                 | 18+                                   | 18+    | 3752                                    | 6145   | *    |
| Estonia           | 2010       | Estonian Biobank                                                      | National                     | both                 | 18+                                   | 18+    | 3766                                    | 6504   | *    |
| Estonia           | 2011       | Estonian Biobank                                                      | National                     | both                 | 18+                                   | 18+    | 102                                     | 168    | *    |
| Estonia           | 2012       | Estonian Biobank                                                      | National                     | both                 | 18+                                   | 18+    | 82                                      | 126    | *    |
| Estonia           | 2013       | Estonian Biobank                                                      | National                     | both                 | 18+                                   | 18+    | 104                                     | 146    | *    |
| Estonia           | 2013-2015  | National Dietary Survey (RTU) 2014                                    | National                     | both                 | 18-74                                 | 18-74  | 890                                     | 1768   | *    |
| Ethiopia          | 2000       | DHS                                                                   | National                     | both                 |                                       | 18-49  |                                         | 11776  | †    |
| Ethiopia          | 2005       | DHS                                                                   | National                     | both                 |                                       | 18-49  |                                         | 5247   | †    |
| Ethiopia          | 2006       | STEPS                                                                 | Subnational                  | urban                | 25-64                                 | 25-64  | 1642                                    | 2295   | †    |
| Ethiopia          | 2011       | DHS                                                                   | National                     | both                 | 18-59                                 | 18-49  | 12624                                   | 12833  | †    |
| Ethiopia          | 2016       | DHS                                                                   | National                     | both                 | 18-59                                 | 18-49  | 10912                                   | 12143  | †    |
| Fiji              | 2002       | STEPS                                                                 | National                     | both                 | 18-64                                 | 18-64  | 2498                                    | 3605   | †    |
| Fiji              | 2005-2007  | Pacific Obesity Prevention in Communities - Ma'alahi Youth Project    | Subnational                  | urban                | 18-19                                 | 18-19  | 288                                     | 329    | *    |
| Fiji              | 2007-2008  | Pacific Obesity Prevention in Communities - Ma'alahi Youth Project    | Subnational                  | urban                | 18-22                                 | 18-22  | 398                                     | 458    | *    |
| Fiji              | 2009       | Fiji Eye Health Survey 2009                                           | National                     | both                 | 40+                                   | 40+    | 582                                     | 776    | *    |
| Fiji              | 2011       | STEPS                                                                 | National                     | both                 | 25-64                                 | 25-64  | 1123                                    | 1417   | †    |
| Finland           | 1983       | Young Finns Study 1983                                                | National                     | both                 | 18-21                                 | 18-21  | 350                                     | 402    | 1*   |
| Finland           | 1984-1989  | Kuopio Ischaemic Heart Disease Risk factor Study                      | Subnational                  | both                 | 42-61                                 |        | 2670                                    |        | *    |
| Finland           | 1985       | INTERSALT, Turku                                                      | Community                    | urban                | 20-59                                 | 20-59  | 100                                     | 100    | †    |
| Finland           | 1985-1986  | INTERSALT, Joensuu                                                    | Community                    | urban                | 20-59                                 | 20-59  | 100                                     | 100    | †    |
| Finland           | 1986       | Young Finns Study 1986                                                | National                     | both                 | 18-24                                 | 18-24  | 467                                     | 567    | *    |
| Finland           | 1987       | MONICA, North Karelia/Kuopio/Turku/Loimaa                             | Subnational                  | both                 | 25-64                                 | 25-64  | 2896                                    | 3151   | †    |
| Finland           | 1989       | Finnish cohort of the FINE study                                      | Community                    | rural                | 70-89                                 |        | 446                                     |        | *    |
| Finland           | 1990-1992  | Oulu 35 Study                                                         | Community                    | urban                | 56-57                                 | 56-57  | 231                                     | 326    | *    |
| Finland           | 1991-1993  | Kuopio Ischaemic Heart Disease Risk factor Study                      | Subnational                  | both                 | 46-64                                 |        | 1037                                    |        | *    |

| Country          | Data years | Survey/study name/citation                                                | Level of representative-ness | Rural, urban or both | Age range as used for global analysis |        | Sample size as used for global analysis |        | Note |
|------------------|------------|---------------------------------------------------------------------------|------------------------------|----------------------|---------------------------------------|--------|-----------------------------------------|--------|------|
|                  |            |                                                                           |                              |                      | Male                                  | Female | Male                                    | Female |      |
| Finland          | 1992       | The National FINRISK Study                                                | Subnational                  | both                 | 25-64                                 | 25-64  | 2849                                    | 3201   | *    |
| Finland          | 1994       | Finnish cohort of the FINE study                                          | Community                    | rural                | 75-94                                 |        | 266                                     |        | *    |
| Finland          | 1996-1998  | Oulu 35 Study                                                             | Community                    | urban                | 60-63                                 | 60-63  | 242                                     | 345    | *    |
| Finland          | 1996-1998  | Savitaipale Study, Baseline                                               | Community                    | rural                | 40-66                                 | 40-66  | 574                                     | 574    | *    |
| Finland          | 1997       | The National FINRISK Study                                                | National                     | both                 | 25-74                                 | 25-74  | 4128                                    | 4131   | *    |
| Finland          | 1997       | North Finland Birth Cohort 1966                                           | Community                    | both                 | 30-31                                 | 30-31  | 2770                                    | 149    | *    |
| Finland          | 1998-2001  | Kuopio Ischaemic Heart Disease Risk factor Study                          | Subnational                  | both                 | 53-73                                 | 53-73  | 854                                     | 914    | *    |
| Finland          | 2000       | Finnish cohort of the FINE study                                          | Community                    | rural                | 81-96                                 |        | 92                                      |        | *    |
| Finland          | 2000-2001  | Health 2000 Survey                                                        | National                     | both                 | 30+                                   | 30+    | 2591                                    | 3156   | *    |
| Finland          | 2001       | Young Finns Study 2001                                                    | National                     | both                 | 24-39                                 | 24-39  | 1004                                    | 1162   | *    |
| Finland          | 2001-2003  | Oulu 45 Study                                                             | Community                    | urban                | 55-58                                 | 55-58  | 426                                     | 550    | *    |
| Finland          | 2001-2004  | Helsinki Birth Cohort Study                                               | Community                    | urban                | 56-69                                 | 56-69  | 927                                     | 1074   | *    |
| Finland          | 2002       | The National FINRISK Study                                                | National                     | both                 | 25-74                                 | 25-74  | 3299                                    | 3826   | *    |
| Finland          | 2004-2005  | FIN-D2D                                                                   | Subnational                  | both                 | 45-74                                 | 45-74  | 1364                                    | 1461   | *    |
| Finland          | 2005       | Mantyselka et al., Rheumatology (Oxford) 47(8):1235-38, 2008              | Community                    | rural                | 30-65                                 | 30-65  | 230                                     | 241    | *    |
| Finland          | 2005-2008  | Kuopio Ischaemic Heart Disease Risk factor Study                          | Subnational                  | both                 | 62-82                                 | 60-82  | 1241                                    | 630    | *    |
| Finland          | 2007       | The National FINRISK Study                                                | National                     | both                 | 25-74                                 | 25-74  | 2934                                    | 3323   | *    |
| Finland          | 2007       | Oulu 35 Study                                                             | Community                    | urban                | 71-73                                 | 71-73  | 182                                     | 271    | *    |
| Finland          | 2007       | Young Finns Study 2007                                                    | National                     | both                 | 30-45                                 | 30-45  | 976                                     | 1145   | *    |
| Finland          | 2007-2008  | Savitaipale Study, Follow-up                                              | Community                    | rural                | 51-75                                 | 51-75  | 430                                     | 483    | *    |
| Finland          | 2008       | Control group for Finnish male former elite athletes                      | National                     | both                 | 61+                                   |        | 206                                     |        | *    |
| Finland          | 2011       | Young Finns Study 2011                                                    | National                     | both                 | 34-49                                 | 34-49  | 870                                     | 1060   | *    |
| Finland          | 2011-2012  | Health 2011 Survey                                                        | National                     | both                 | 30+                                   | 30+    | 2021                                    | 2519   | *    |
| Finland          | 2012       | The National FINRISK Study                                                | National                     | both                 | 25-74                                 | 25-74  | 2774                                    | 3052   | *    |
| Finland          | 2012       | North Finland Birth Cohort 1966                                           | Community                    | both                 | 45-47                                 | 45-47  | 2541                                    | 3224   | *    |
| France           | 1985-1987  | MONICA, Strasbourg                                                        | Subnational                  | both                 | 35-64                                 | 35-64  | 664                                     | 713    | †    |
| France           | 1985-1987  | MONICA, Strasbourg                                                        | Community                    | both                 | 25-34                                 | 25-34  | 65                                      | 78     | †    |
| France           | 1985-1987  | MONICA, Toulouse                                                          | Subnational                  | both                 | 35-64                                 | 35-64  | 675                                     | 644    | †    |
| France           | 1986-1989  | MONICA, Lille                                                             | Community                    | urban                | 25-64                                 | 25-64  | 878                                     | 732    | †    |
| France           | 1988-1991  | MONICA, Toulouse                                                          | Subnational                  | both                 | 35-64                                 |        | 586                                     |        | †    |
| France           | 1994-1996  | MONICA, Toulouse                                                          | Subnational                  | both                 | 35-64                                 | 35-64  | 608                                     | 566    | †    |
| France           | 1995-1997  | MONICA, Lille                                                             | Community                    | urban                | 36-67                                 | 36-67  | 598                                     | 590    | †    |
| France           | 1995-1997  | MONICA, Strasbourg                                                        | Subnational                  | both                 | 35-64                                 | 35-64  | 526                                     | 523    | †    |
| France           | 1996-2003  | Jaquet et al., Diabetologia 48(5):849-55, 2005                            | Community                    | urban                | 18-34                                 | 18-34  | 173                                     | 164    | *    |
| France           | 1999-2001  | The Three City Study                                                      | Community                    | urban                | 65+                                   | 65+    | 2423                                    | 3778   | *    |
| France           | 2004-2006  | National Monitoring of Arterial Risk in Lille (MONA LISA Lille)           | Subnational                  | urban                | 35-75                                 | 35-75  | 783                                     | 795    | *    |
| France           | 2005-2007  | National Monitoring of Arterial Risk in Bas-Rhin (MONA LISA Bas-Rhin)     | Subnational                  | both                 | 35-74                                 | 35-74  | 780                                     | 787    | *    |
| France           | 2005-2007  | Monitoring national du risque artériel (MONA LISA Toulouse)               | Subnational                  | both                 | 35-74                                 | 35-74  | 829                                     | 796    | *    |
| France           | 2006-2007  | Etude Nationale Nutrition Santé                                           | National                     | both                 | 18-74                                 | 18-74  | 876                                     | 1512   | *    |
| France           | 2006-2008  | The Three City Study                                                      | Community                    | urban                | 72+                                   | 72+    | 768                                     | 1217   | *    |
| France           | 2011-2013  | Enquête Littorale Souffle Air Biologie Environnement (ELISABET) Dunkerque | Community                    | urban                | 40-64                                 | 40-64  | 761                                     | 812    | 2*   |
| France           | 2011-2013  | Enquête Littorale Souffle Air Biologie Environnement (ELISABET) Lille     | Community                    | urban                | 40-64                                 | 40-64  | 758                                     | 857    | 2*   |
| French Polynesia | 2010       | STEPS                                                                     | National                     | both                 | 18-64                                 | 18-64  | 1458                                    | 1916   | †    |
| Gabon            | 2000       | DHS                                                                       | National                     | both                 |                                       | 20-49  |                                         | 2082   | †    |
| Gabon            | 2009       | STEPS                                                                     | Subnational                  | urban                | 18-64                                 | 18-64  | 1009                                    | 1443   | †    |
| Gabon            | 2012       | DHS                                                                       | National                     | both                 |                                       | 18-49  |                                         | 4365   | †    |
| Gambia           | 1996-1997  | National Survey of Blindness and Low Vision                               | National                     | both                 | 18+                                   | 18+    | 1733                                    | 2071   | *    |
| Gambia           | 2003       | Siervo et al., Eur J Clin Nutr 60(4):455-63, 2006                         | Community                    | urban                | 18-50                                 | 18-50  | 50                                      | 50     | *    |
| Gambia           | 2010       | STEPS                                                                     | National                     | both                 | 25-64                                 | 25-64  | 1610                                    | 1919   | †    |
| Gambia           | 2013       | DHS                                                                       | National                     | both                 |                                       | 18-49  |                                         | 3605   | †    |
| Georgia          | 2010       | STEPS                                                                     | National                     | both                 | 18-64                                 | 18-64  | 1842                                    | 4460   | †    |
| Georgia          | 2016       | STEPS                                                                     | National                     | both                 | 18-69                                 | 18-69  | 1188                                    | 2784   | †    |
| Germany          | 1983-1987  | MONICA, Rhein-Neckar Region                                               | Community                    | urban                | 35-64                                 | 35-64  | 1489                                    | 1609   | †    |
| Germany          | 1984       | The German Conscript Database                                             | National                     | both                 | 19                                    |        | 419719                                  |        | 1*   |
| Germany          | 1984-1985  | MONICA, Augsburg                                                          | Community                    | both                 | 25-64                                 | 25-64  | 2005                                    | 1961   | †    |
| Germany          | 1984-1986  | MONICA, Cottbus County                                                    | Community                    | urban                | 25-64                                 | 25-64  | 657                                     | 739    | †    |
| Germany          | 1985       | The German Conscript Database                                             | National                     | both                 | 19                                    |        | 402487                                  |        | *    |
| Germany          | 1985-1986  | INTERSALT, Cottbus                                                        | Community                    | urban                | 20-59                                 | 20-59  | 99                                      | 99     | †    |
| Germany          | 1985-1986  | INTERSALT, Heidelberg                                                     | Community                    | urban                | 20-59                                 | 20-59  | 97                                      | 99     | †    |

| Country | Data years | Survey/study name/citation                                                                                                    | Level of representative-ness | Rural, urban or both | Age range as used for global analysis |        | Sample size as used for global analysis |        | Note |
|---------|------------|-------------------------------------------------------------------------------------------------------------------------------|------------------------------|----------------------|---------------------------------------|--------|-----------------------------------------|--------|------|
|         |            |                                                                                                                               |                              |                      | Male                                  | Female | Male                                    | Female |      |
| Germany | 1985-1986  | CINDI                                                                                                                         | Subnational                  | both                 | 25-64                                 | 25-64  | 1875                                    | 1990   | *    |
| Germany | 1985-1986  | INTERSALT, Bernried                                                                                                           | Community                    | urban                | 20-59                                 | 20-59  | 99                                      | 98     | †    |
| Germany | 1986       | The German Conscription Database                                                                                              | National                     | both                 | 19                                    |        | 382632                                  |        | *    |
| Germany | 1987       | The German Conscription Database                                                                                              | National                     | both                 | 19                                    |        | 349083                                  |        | *    |
| Germany | 1987-1988  | MONICA, Erfurt                                                                                                                | Community                    | urban                | 25-64                                 | 25-64  | 871                                     | 909    | †    |
| Germany | 1988       | The German Conscription Database                                                                                              | National                     | both                 | 19                                    |        | 303265                                  |        | *    |
| Germany | 1988       | German Cardiovascular Prevention Study (GCP) - National Health Survey 1988                                                    | Subnational                  | both                 | 25-69                                 | 25-69  | 2642                                    | 2678   | *    |
| Germany | 1988       | MONICA, Berlin-Lichtenberg                                                                                                    | Community                    | urban                | 25-64                                 | 25-64  | 690                                     | 728    | †    |
| Germany | 1988       | MONICA, Bremen North/West                                                                                                     | Community                    | urban                | 25-69                                 | 25-69  | 619                                     | 632    | †    |
| Germany | 1988       | MONICA, Bremen Center/South/East                                                                                              | Community                    | urban                | 25-69                                 | 25-69  | 499                                     | 582    | †    |
| Germany | 1988       | MONICA, Chemnitz                                                                                                              | Community                    | urban                | 25-64                                 | 25-64  | 288                                     | 382    | †    |
| Germany | 1988       | MONICA, Zwickau                                                                                                               | Community                    | urban                | 25-64                                 | 25-64  | 193                                     | 250    | †    |
| Germany | 1988-1989  | CINDI                                                                                                                         | Subnational                  | both                 | 25-64                                 | 25-64  | 1361                                    | 1435   | *    |
| Germany | 1988-1989  | MONICA, Halle County                                                                                                          | Subnational                  | urban                | 25-64                                 | 25-64  | 959                                     | 1201   | †    |
| Germany | 1988-1989  | MONICA, Rest of Karl-Marx-Stadt County                                                                                        | Subnational                  | urban                | 25-64                                 | 25-64  | 541                                     | 626    | †    |
| Germany | 1989       | The German Conscription Database                                                                                              | National                     | both                 | 19                                    |        | 245740                                  |        | *    |
| Germany | 1989-1990  | MONICA, Cottbus County                                                                                                        | Community                    | urban                | 25-64                                 | 25-64  | 539                                     | 529    | †    |
| Germany | 1989-1990  | MONICA, Augsburg                                                                                                              | Community                    | both                 | 25-64                                 | 25-64  | 1933                                    | 1944   | †    |
| Germany | 1990       | The German Conscription Database                                                                                              | National                     | both                 | 19                                    |        | 206599                                  |        | *    |
| Germany | 1990-1992  | European Community Respiratory Health Survey, Hamburg                                                                         | Community                    | urban                | 20-47                                 | 20-47  | 146                                     | 138    | *    |
| Germany | 1990-1992  | European Community Respiratory Health Survey, Erfurt                                                                          | Community                    | urban                | 20-47                                 | 20-47  | 146                                     | 124    | *    |
| Germany | 1991       | The German Conscription Database                                                                                              | National                     | both                 | 19                                    |        | 138195                                  |        | *    |
| Germany | 1991-1992  | MONICA, Bremen North/West                                                                                                     | Community                    | urban                | 25-69                                 | 25-69  | 599                                     | 671    | †    |
| Germany | 1991-1992  | MONICA, Bremen Center/South/East                                                                                              | Community                    | urban                | 25-69                                 | 25-69  | 524                                     | 546    | †    |
| Germany | 1991-1992  | CINDI                                                                                                                         | Subnational                  | both                 | 25-64                                 | 25-64  | 1326                                    | 1400   | *    |
| Germany | 1991-1992  | German Cardiovascular Prevention Study (GCP) - National Health Survey 1991                                                    | Subnational                  | both                 | 25-69                                 | 25-69  | 2599                                    | 2670   | *    |
| Germany | 1991-1992  | First National Examination of life conditions, Environment and Health in East Germany 1991/92                                 | Subnational                  | both                 | 25-69                                 | 25-69  | 1042                                    | 1155   | *    |
| Germany | 1991-1992  | MONICA, Erfurt                                                                                                                | Community                    | urban                | 25-64                                 | 25-64  | 587                                     | 572    | †    |
| Germany | 1992       | The German Conscription Database                                                                                              | National                     | both                 | 19                                    |        | 220956                                  |        | *    |
| Germany | 1993       | The German Conscription Database                                                                                              | National                     | both                 | 19                                    |        | 188655                                  |        | *    |
| Germany | 1993-1994  | MONICA, Chemnitz                                                                                                              | Community                    | urban                | 25-64                                 | 25-64  | 408                                     | 424    | †    |
| Germany | 1993-1994  | MONICA, Zwickau                                                                                                               | Community                    | urban                | 25-64                                 | 25-64  | 139                                     | 186    | †    |
| Germany | 1994       | The German Conscription Database                                                                                              | National                     | both                 | 19                                    |        | 155426                                  |        | *    |
| Germany | 1994-1995  | MONICA, Augsburg                                                                                                              | Community                    | both                 | 25-64                                 | 25-64  | 1898                                    | 1968   | †    |
| Germany | 1994-1998  | EPIC Heidelberg                                                                                                               | Community                    | urban                | 40-64                                 | 35-64  | 11680                                   | 13458  | *    |
| Germany | 1994-1998  | EPIC Potsdam                                                                                                                  | Community                    | urban                | 40-64                                 | 35-64  | 10224                                   | 15995  | *    |
| Germany | 1995       | The German Conscription Database                                                                                              | National                     | both                 | 19                                    |        | 185762                                  |        | *    |
| Germany | 1996       | The German Conscription Database                                                                                              | National                     | both                 | 19                                    |        | 191260                                  |        | *    |
| Germany | 1997       | The German Conscription Database                                                                                              | National                     | both                 | 19                                    |        | 148738                                  |        | *    |
| Germany | 1997-1999  | German National Health Interview and Examination Survey (GNHIES98)                                                            | National                     | both                 | 18-79                                 | 18-79  | 3435                                    | 3608   | *    |
| Germany | 1997-2001  | Study of Health in Pomerania (SHIP-0) baseline study                                                                          | Subnational                  | both                 | 20-80                                 | 20-80  | 2111                                    | 2187   | *    |
| Germany | 1998       | The German Conscription Database                                                                                              | National                     | both                 | 19                                    |        | 146528                                  |        | *    |
| Germany | 1999       | The German Conscription Database                                                                                              | National                     | both                 | 19                                    |        | 292732                                  |        | *    |
| Germany | 1999-2001  | KORA S4 Study: Kooperative Research in the Region of Augsburg Survey 4                                                        | Community                    | both                 | 24-75                                 | 24-75  | 2076                                    | 2148   | *    |
| Germany | 2000-2001  | European Community Respiratory Health Survey, Hamburg                                                                         | Community                    | urban                | 30-57                                 | 30-57  | 146                                     | 138    | *    |
| Germany | 2000-2001  | European Community Respiratory Health Survey, Erfurt                                                                          | Community                    | urban                | 30-57                                 | 30-57  | 146                                     | 124    | *    |
| Germany | 2000-2002  | Epidemiological study of the chances of prevention, early recognition and optimal treatment of chronic diseases in an elderly | Subnational                  | both                 | 50-75                                 | 50-75  | 4242                                    | 5091   | *    |
| Germany | 2000-2003  | Heinz Nixdorf RECALL Study                                                                                                    | Community                    | urban                | 45-74                                 | 45-74  | 2375                                    | 2393   | *    |
| Germany | 2002       | Echinococcus Multilocularis and Internal Diseases in Leutkirch                                                                | Community                    | urban                | 18-65                                 | 18-65  | 1047                                    | 1128   | *    |
| Germany | 2002-2006  | Study of Health in Pomerania (SHIP-1) 5-year follow-up                                                                        | Subnational                  | both                 | 25-85                                 | 25-85  | 1583                                    | 1707   | *    |
| Germany | 2006-2008  | KORA F4 Study: Kooperative Research in the Region of Augsburg Follow-Up of Survey 4                                           | Community                    | both                 | 31-81                                 | 31-81  | 1480                                    | 1583   | *    |
| Germany | 2008       | The German Conscription Database                                                                                              | National                     | both                 | 19                                    |        | 98926                                   |        | *    |
| Germany | 2008-2011  | Epidemiological study of the chances of prevention, early recognition and optimal treatment of chronic diseases in an elderly | Subnational                  | both                 | 58-84                                 | 58-84  | 1449                                    | 1581   | *    |
| Germany | 2008-2011  | German Health Interview and Examination Survey for adults 2008-11 (DEGS1)                                                     | National                     | both                 | 18-79                                 | 18-79  | 3389                                    | 3650   | *    |
| Germany | 2008-2012  | Study of Health in Pomerania, second cohort (SHIP-TREND)                                                                      | Subnational                  | both                 | 20-79                                 | 20-79  | 2099                                    | 2232   | *    |
| Germany | 2009       | The German Conscription Database                                                                                              | National                     | both                 | 19                                    |        | 111455                                  |        | *    |
| Germany | 2010       | The German Conscription Database                                                                                              | National                     | both                 | 19                                    |        | 101911                                  |        | *    |
| Ghana   | 1993       | DHS                                                                                                                           | National                     | both                 |                                       | 20-49  |                                         | 1650   | †    |
| Ghana   | 1997       | Amoah et al., Ethn Dis 13(2 Suppl 2):S97-101, 2003                                                                            | Community                    | both                 | 25+                                   | 25+    | 1857                                    | 2875   | *    |



| Country       | Data years | Survey/study name/citation                                                                      | Level of representative-ness | Rural, urban or both | Age range as used for global analysis |        | Sample size as used for global analysis |        | Note |
|---------------|------------|-------------------------------------------------------------------------------------------------|------------------------------|----------------------|---------------------------------------|--------|-----------------------------------------|--------|------|
|               |            |                                                                                                 |                              |                      | Male                                  | Female | Male                                    | Female |      |
| Ghana         | 1998       | DHS                                                                                             | National                     | both                 |                                       | 20-49  |                                         | 1979   | †    |
| Ghana         | 2001       | Addo et al., Ethn Dis 16(4):894-99, 2006                                                        | Community                    | rural                | 18+                                   | 18+    | 89                                      | 206    | *    |
| Ghana         | 2001-2002  | Cappuccio et al., Hypertension 43(5):1017-22, 2004                                              | Community                    | both                 | 35-84                                 | 35-84  | 194                                     | 338    | *    |
| Ghana         | 2002       | Amoah et al., Ethn Dis 13(2 Suppl 2):S97-101, 2003                                              | Community                    | both                 | 25+                                   | 25+    | 1859                                    | 2947   | *    |
| Ghana         | 2003       | Women's Health Study of Accra                                                                   | Community                    | urban                |                                       | 18+    |                                         | 1184   | *    |
| Ghana         | 2003       | DHS                                                                                             | National                     | both                 |                                       | 18-49  |                                         | 4310   | †    |
| Ghana         | 2006       | STEPS                                                                                           | Community                    | urban                | 25+                                   | 25+    | 841                                     | 1635   | †    |
| Ghana         | 2007-2008  | SAGE                                                                                            | National                     | both                 | 50+                                   | 50+    | 2192                                    | 1987   | †    |
| Ghana         | 2008       | DHS                                                                                             | National                     | both                 |                                       | 18-49  |                                         | 3882   | †    |
| Ghana         | 2008-2010  | Women's Health Study of Accra                                                                   | Community                    | urban                |                                       | 18+    |                                         | 2677   | *    |
| Ghana         | 2012-2014  | Research on Obesity and Diabetes among African Migrants (RODAM), control group                  | Subnational                  | both                 | 25+                                   | 25+    | 849                                     | 1710   | *    |
| Ghana         | 2014       | DHS                                                                                             | National                     | both                 | 18-59                                 | 18-49  | 3876                                    | 3933   | †    |
| Greece        | 1991       | Seven Countries Study                                                                           | Subnational                  | both                 | 70-89                                 |        | 177                                     |        | *    |
| Greece        | 1991-1999  | EPIC                                                                                            | National                     | both                 | 19-86                                 | 19-86  | 11578                                   | 16477  | *    |
| Greece        | 1997       | The Didima Study                                                                                | Community                    | rural                | 18+                                   | 18+    | 265                                     | 373    | *    |
| Greece        | 2000-2001  | Karalis et al., BMC Public Health 7:351, 2007                                                   | Community                    | rural                | 18+                                   | 18+    | 73                                      | 87     | *    |
| Greece        | 2003       | National Epidemiological Survey                                                                 | National                     | both                 | 18-19                                 | 18-19  | 987                                     | 1150   | *    |
| Greece        | 2010-2012  | ADONUT                                                                                          | National                     | both                 | 18-19                                 | 18-19  | 1531                                    | 1641   | *    |
| Greece        | 2013-2015  | Hellenic National Nutrition and Health Survey (HNNHS)                                           | National                     | both                 | 18+                                   | 18+    | 1514                                    | 2175   | *    |
| Greece        | 2016       | SKG-Elderly                                                                                     | Community                    | urban                | 60+                                   | 60+    | 51                                      | 63     | *    |
| Greenland     | 2005-2010  | Population Health Survey in Greenland                                                           | National                     | both                 | 18+                                   | 18+    | 1336                                    | 1714   | *    |
| Grenada       | 2011       | STEPS                                                                                           | National                     | both                 | 25-64                                 | 25-64  | 438                                     | 637    | †    |
| Guatemala     | 1995       | DHS                                                                                             | National                     | both                 |                                       | 20-49  |                                         | 4547   | †    |
| Guatemala     | 1998-1999  | DHS                                                                                             | National                     | both                 |                                       | 20-49  |                                         | 2172   | †    |
| Guatemala     | 2001-2002  | CAMDI                                                                                           | Community                    | urban                | 20+                                   | 20+    | 293                                     | 638    | *    |
| Guatemala     | 2002       | Reproductive Health Survey                                                                      | National                     | both                 | 18-59                                 | 18-49  | 1922                                    | 6579   | *    |
| Guatemala     | 2003-2005  | The Institute of Nutrition of Central America and Panama Nutrition Supplementation Trial Cohort | Community                    | both                 | 25-41                                 | 25-41  | 249                                     | 267    | *    |
| Guatemala     | 2008-2009  | Encuesta Nacional de Salud Materno Infantil                                                     | National                     | both                 | 18-59                                 | 18-49  | 5807                                    | 13668  | *    |
| Guatemala     | 2014-2015  | DHS                                                                                             | National                     | both                 |                                       | 18-49  |                                         | 20785  | †    |
| Guinea        | 1999       | DHS                                                                                             | National                     | both                 |                                       | 20-49  |                                         | 2984   | †    |
| Guinea        | 2005       | DHS                                                                                             | National                     | both                 |                                       | 18-49  |                                         | 3091   | †    |
| Guinea        | 2009       | STEPS                                                                                           | Subnational                  | both                 | 18-64                                 | 18-64  | 1044                                    | 1119   | †    |
| Guinea        | 2012       | DHS                                                                                             | National                     | both                 |                                       | 18-49  |                                         | 3624   | †    |
| Guinea Bissau | 2010       | Multiple Indicator Cluster Survey                                                               | National                     | both                 |                                       | 18-49  |                                         | 6653   | *    |
| Guyana        | 2009       | DHS                                                                                             | National                     | both                 | 18-49                                 | 18-49  | 2954                                    | 4009   | †    |
| Haiti         | 1994-1995  | DHS                                                                                             | National                     | both                 |                                       | 20-49  |                                         | 1788   | †    |
| Haiti         | 2000       | DHS                                                                                             | National                     | both                 |                                       | 18-49  |                                         | 7781   | †    |
| Haiti         | 2005-2006  | DHS                                                                                             | National                     | both                 |                                       | 18-49  |                                         | 4192   | †    |
| Haiti         | 2012       | DHS                                                                                             | National                     | both                 |                                       | 18-49  |                                         | 7565   | †    |
| Haiti         | 2016-2017  | DHS                                                                                             | National                     | both                 |                                       | 18-49  |                                         | 7668   | †    |
| Honduras      | 1996       | Honduras National Micronutrient Survey                                                          | National                     | both                 |                                       | 20-40  |                                         | 722    | *    |
| Honduras      | 2003-2004  | CAMDI                                                                                           | Community                    | urban                | 20+                                   | 20+    | 428                                     | 764    | *    |
| Honduras      | 2005-2006  | DHS                                                                                             | National                     | both                 |                                       | 18-49  |                                         | 15463  | †    |
| Honduras      | 2011-2012  | DHS                                                                                             | National                     | both                 |                                       | 18-49  |                                         | 18078  | †    |
| Hungary       | 1985       | INTERSALT                                                                                       | Community                    | rural                | 20-59                                 | 20-59  | 100                                     | 100    | †    |
| Hungary       | 1985-1988  | First Hungarian Representative Nutrition Survey                                                 | National                     | both                 | 18+                                   | 18+    | 3079                                    | 8916   | *    |
| Hungary       | 1987-1988  | MONICA, Budapest                                                                                | Community                    | urban                | 35-64                                 | 35-64  | 1413                                    | 1594   | †    |
| Hungary       | 1987-1988  | MONICA, Pecs                                                                                    | Community                    | urban                | 35-64                                 | 35-64  | 1573                                    | 1510   | †    |
| Hungary       | 2003       | The European Male Ageing Study                                                                  | Community                    | both                 | 40+                                   |        | 428                                     |        | *    |
| Hungary       | 2008       | The European Male Ageing Study                                                                  | Community                    | both                 | 40+                                   |        | 349                                     |        | *    |
| Iceland       | 1985-1986  | INTERSALT                                                                                       | Community                    | urban                | 20-59                                 | 20-59  | 100                                     | 100    | †    |
| Iceland       | 1985-1987  | The Reykjavik Study (Men)                                                                       | Subnational                  | urban                | 51-79                                 |        | 2584                                    |        | *    |
| Iceland       | 1987-1991  | The Reykjavik Study (Women)                                                                     | Subnational                  | urban                |                                       | 52-82  |                                         | 2993   | *    |
| Iceland       | 1988-1989  | MONICA, Arnes County                                                                            | Community                    | rural                | 25-64                                 | 25-64  | 385                                     | 435    | †    |
| Iceland       | 1988-1989  | MONICA, Reykjavik                                                                               | Subnational                  | urban                | 25-64                                 | 25-64  | 414                                     | 443    | †    |
| Iceland       | 1991-1994  | The Reykjavik Study (Men)                                                                       | Subnational                  | urban                | 70-86                                 |        | 797                                     |        | *    |
| Iceland       | 1993-1994  | MONICA, Arnes County                                                                            | Community                    | rural                | 25-64                                 | 25-64  | 422                                     | 484    | †    |
| Iceland       | 1993-1994  | MONICA, Reykjavik                                                                               | Subnational                  | urban                | 25-64                                 | 25-64  | 441                                     | 448    | †    |
| Iceland       | 1994-1996  | The Reykjavik Study (Women)                                                                     | Subnational                  | urban                |                                       | 69-88  |                                         | 1101   | *    |

| Country | Data years | Survey/study name/citation                                                                                                    | Level of representative-ness | Rural, urban or both | Age range as used for global analysis |        | Sample size as used for global analysis |        | Note |
|---------|------------|-------------------------------------------------------------------------------------------------------------------------------|------------------------------|----------------------|---------------------------------------|--------|-----------------------------------------|--------|------|
|         |            |                                                                                                                               |                              |                      | Male                                  | Female | Male                                    | Female |      |
| Iceland | 2001-2003  | The Reykjavik Study for the young                                                                                             | Subnational                  | urban                | 47-62                                 | 47-62  | 626                                     | 705    | *    |
| Iceland | 2002-2006  | AGES-Reykjavik Study                                                                                                          | Subnational                  | urban                | 66-96                                 | 66-96  | 2413                                    | 3272   | *    |
| Iceland | 2005-2011  | Risk Evaluation For INfarct Estimates (REFINE)                                                                                | Subnational                  | urban                | 20-73                                 | 20-73  | 3402                                    | 3525   | *    |
| Iceland | 2007-2011  | AGES-Reykjavik Study - follow up visit                                                                                        | Subnational                  | urban                | 71-98                                 | 71-98  | 1389                                    | 1928   | *    |
| Iceland | 2010-2012  | Risk Evaluation For INfarct Estimates (REFINE) follow-up visit (REFINELO)                                                     | Subnational                  | urban                | 26-74                                 | 26-74  | 653                                     | 667    | *    |
| Iceland | 2012-2013  | Risk Evaluation For INfarct Estimates (REFINE) - follow-up visit (REFLOCT)                                                    | Subnational                  | urban                | 55-73                                 | 55-73  | 516                                     | 561    | *    |
| India   | 1986       | INTERSALT                                                                                                                     | Community                    | urban                | 20-59                                 | 20-59  | 100                                     | 99     | †    |
| India   | 1988-1989  | Ramachandran et al., Diabetes Res Clin Pract 58(1):55-60, 2002                                                                | Community                    | urban                | 20-74                                 | 20-74  | 455                                     | 437    | *    |
| India   | 1988-1990  | NNMB survey                                                                                                                   | National                     | rural                | 20+                                   | 20+    | 4760                                    | 6607   | *    |
| India   | 1991-1994  | Prabhakaran et al., Chronic Illn 3(1):8-19, 2007                                                                              | Community                    | both                 | 35-64                                 | 35-64  | 1930                                    | 2085   | *    |
| India   | 1991-1995  | Reddy et al., Obes Rev 3(3):197-202, 2002                                                                                     | Community                    | both                 | 35-64                                 | 35-64  | 2526                                    | 2926   | *    |
| India   | 1991-1997  | Mumbai Cohort Study                                                                                                           | Community                    | urban                | 35+                                   | 35+    | 88658                                   | 59515  | *    |
| India   | 1992-1994  | Jaipur Heart Watch 1                                                                                                          | Community                    | both                 | 20-80                                 | 20-80  | 3331                                    | 1929   | *    |
| India   | 1993-1994  | Khongsdier, Eur J Clin Nutr 56(6):484-89, 2002                                                                                | Community                    | both                 | 18-59                                 |        | 575                                     |        | *    |
| India   | 1995       | Shobana et al., Diabetes Res Clin Pract 42(3):181-86, 1998                                                                    | Community                    | urban                | 20-74                                 | 20-74  | 1061                                    | 1093   | *    |
| India   | 1995-1996  | Kusuma et al., Ann Hum Biol 29(5):502-12, 2002                                                                                | Community                    | both                 | 18-84                                 | 18-84  | 747                                     | 737    | *    |
| India   | 1995-1996  | Epidemiology of blood pressure across cross-cultural populations of Visakhapatnam district, Andhra Pradesh, India             | Community                    | rural                | 19-76                                 | 19-76  | 209                                     | 228    | *    |
| India   | 1995-1997  | Aravind Comprehensive Eye Survey                                                                                              | Community                    | rural                | 40+                                   | 40+    | 2308                                    | 2830   | *    |
| India   | 1995-1997  | Kashmiri Adults                                                                                                               | Subnational                  | both                 | 40+                                   | 40+    | 2496                                    | 2587   | *    |
| India   | 1996       | NNMB survey                                                                                                                   | National                     | rural                | 18+                                   | 18+    | 12747                                   | 18018  | *    |
| India   | 1996-1999  | Chennai Urban Population Study                                                                                                | Community                    | urban                | 20+                                   | 20+    | 557                                     | 705    | *    |
| India   | 1997       | Ramachandran et al., Diabetes Res Clin Pract 44(3):207-13, 1999                                                               | Community                    | rural                | 20-74                                 | 20-74  | 738                                     | 879    | *    |
| India   | 1998-1999  | DHS                                                                                                                           | National                     | both                 |                                       | 20-49  |                                         | 72536  | †    |
| India   | 1998-2001  | Chennai Prospective Study                                                                                                     | Community                    | urban                | 35+                                   | 35+    | 264848                                  | 235968 | *    |
| India   | 1999-2001  | Jaipur Heart Watch 2                                                                                                          | Community                    | urban                | 20-75                                 | 20-75  | 534                                     | 569    | *    |
| India   | 1999-2002  | New Delhi Birth Cohort                                                                                                        | Community                    | urban                | 26-33                                 | 26-33  | 886                                     | 638    | *    |
| India   | 2000       | Ramachandran et al., Diabet Med 20(3):220-24, 2003                                                                            | Subnational                  | urban                | 20-75                                 | 20-75  | 4640                                    | 5257   | *    |
| India   | 2001       | NNMB survey                                                                                                                   | National                     | rural                | 18+                                   | 18+    | 11072                                   | 17317  | *    |
| India   | 2001-2004  | Chennai Urban Rural Epidemiology Study                                                                                        | Community                    | urban                | 20+                                   | 20+    | 1094                                    | 1254   | *    |
| India   | 2002-2003  | Jaipur Heart Watch 3                                                                                                          | Community                    | urban                | 20-59                                 | 20-59  | 179                                     | 195    | *    |
| India   | 2002-2003  | Blood Pressure epidemiology in tribal, rural and urban communities of Orissa with special reference to physical and social pa | Community                    | rural                | 18-80                                 | 18-80  | 200                                     | 186    | *    |
| India   | 2003-2005  | India STEPS, Ballabgarh                                                                                                       | Subnational                  | both                 | 18-69                                 | 18-69  | 2486                                    | 2669   | *    |
| India   | 2003-2005  | India STEPS, Chennai                                                                                                          | Subnational                  | both                 | 18-69                                 | 18-69  | 2515                                    | 2484   | *    |
| India   | 2003-2005  | India STEPS, Delhi                                                                                                            | Subnational                  | both                 | 18-69                                 | 18-69  | 1163                                    | 1183   | *    |
| India   | 2003-2005  | India STEPS, Dibrugarh                                                                                                        | Subnational                  | both                 | 18-69                                 | 18-69  | 2588                                    | 2531   | *    |
| India   | 2003-2005  | India STEPS, Nagpur                                                                                                           | Subnational                  | both                 | 18-69                                 | 18-69  | 2394                                    | 2423   | *    |
| India   | 2003-2005  | India STEPS, Trivandrum                                                                                                       | Subnational                  | both                 | 18-69                                 | 18-69  | 2286                                    | 2456   | *    |
| India   | 2004-2005  | Jaipur Heart Watch 4                                                                                                          | Community                    | urban                | 20-59                                 | 20-59  | 413                                     | 473    | *    |
| India   | 2005-2006  | DHS                                                                                                                           | National                     | both                 | 18-54                                 | 18-49  | 64044                                   | 102354 | †    |
| India   | 2005-2006  | NNMB survey                                                                                                                   | National                     | rural                | 18+                                   | 18+    | 14036                                   | 18598  | *    |
| India   | 2005-2007  | Prevalence of cardiovascular risk factors in rural Tamil Nadu                                                                 | Community                    | rural                | 25-65                                 | 25-65  | 4927                                    | 5573   | *    |
| India   | 2005-2011  | Bengali School Children                                                                                                       | Community                    | urban                | 18-21                                 | 18-21  | 527                                     | 577    | *    |
| India   | 2006       | Ramachandran et al., Diabetes Care 31(5):893-98, 2008                                                                         | Community                    | both                 | 20+                                   | 20+    | 3321                                    | 3745   | *    |
| India   | 2006-2007  | Kusuma et al., Asia Pac J Public Health 21(4):497-507, 2009                                                                   | Community                    | urban                | 18-74                                 | 18-74  | 182                                     | 192    | *    |
| India   | 2006-2008  | Central India Eye and Medical Study                                                                                           | Community                    | rural                | 30+                                   | 30+    | 2190                                    | 2518   | *    |
| India   | 2006-2008  | Kashmiri Young Adults                                                                                                         | Subnational                  | both                 | 20-40                                 | 20-40  | 2119                                    | 905    | *    |
| India   | 2006-2009  | New Delhi Birth Cohort                                                                                                        | Community                    | urban                | 33-38                                 | 33-38  | 650                                     | 445    | *    |
| India   | 2007-2008  | Integrated Disease Surveillance Project Non-communicable Disease Risk Factors Survey, Andhra Pradesh                          | Subnational                  | both                 | 18-64                                 | 18-64  | 2602                                    | 3312   | *    |
| India   | 2007-2008  | Integrated Disease Surveillance Project Non-communicable Disease Risk Factors Survey, Kerala                                  | Subnational                  | both                 | 18-64                                 | 18-64  | 1615                                    | 3000   | *    |
| India   | 2007-2008  | Integrated Disease Surveillance Project Non-communicable Disease Risk Factors Survey, Madhya Pradesh                          | Subnational                  | both                 | 18-64                                 | 18-64  | 2651                                    | 2733   | *    |
| India   | 2007-2008  | Integrated Disease Surveillance Project Non-communicable Disease Risk Factors Survey, Maharashtra                             | Subnational                  | both                 | 18-64                                 | 18-64  | 2899                                    | 2823   | *    |
| India   | 2007-2008  | Integrated Disease Surveillance Project Non-communicable Disease Risk Factors Survey, Mizoram                                 | Subnational                  | both                 | 18-64                                 | 18-64  | 2137                                    | 1990   | *    |
| India   | 2007-2008  | Integrated Disease Surveillance Project Non-communicable Disease Risk Factors Survey, Tamil Nadu                              | Subnational                  | both                 | 18-64                                 | 18-64  | 1969                                    | 2853   | *    |
| India   | 2007-2008  | Integrated Disease Surveillance Project Non-communicable Disease Risk Factors Survey, Uttarakhand                             | Subnational                  | both                 | 18-64                                 | 18-64  | 1954                                    | 2959   | *    |
| India   | 2007-2008  | SAGE                                                                                                                          | National                     | both                 | 50+                                   | 50+    | 3213                                    | 3147   | †    |
| India   | 2007-2009  | Prevalence of NCD risk factor in people above 15 year in Rural area Nagpur using WHO STEP approach                            | Community                    | rural                | 18+                                   | 18+    | 1833                                    | 1685   | *    |
| India   | 2008-2010  | ICMR India Diabetes Study                                                                                                     | National                     | both                 | 20+                                   | 20+    | 6953                                    | 6889   | *    |
| India   | 2009-2010  | Baseline Survey for the assessment of prevalence of risk factors of NCDs in Gandhinagar District                              | Community                    | both                 | 18-64                                 | 18-64  | 1440                                    | 1421   | *    |
| India   | 2011-2012  | NNMB survey                                                                                                                   | National                     | rural                | 18+                                   | 18+    | 24079                                   | 32208  | *    |

| Country   | Data years | Survey/study name/citation                                                                                     | Level of representative-ness | Rural, urban or both | Age range as used for global analysis |        | Sample size as used for global analysis |        | Note |
|-----------|------------|----------------------------------------------------------------------------------------------------------------|------------------------------|----------------------|---------------------------------------|--------|-----------------------------------------|--------|------|
|           |            |                                                                                                                |                              |                      | Male                                  | Female | Male                                    | Female |      |
| India     | 2012-2013  | District Level Household and Facility Survey (DLHS) 4                                                          | National                     | both                 | 18+                                   | 18+    | 401424                                  | 472287 | †    |
| India     | 2014       | Annual Health Survey: Clinical, Anthropometric and Bio-chemical                                                | National                     | both                 | 18+                                   | 18+    | 440705                                  | 479413 | †    |
| India     | 2015-2016  | DHS                                                                                                            | National                     | both                 | 18-54                                 | 18-49  | 97581                                   | 582772 | †    |
| Indonesia | 1983-1987  | Strickland et al., Eur J Clin Nutr 48 Suppl 3: S98-108; discussion S-9, 1994                                   | Community                    | both                 | 18+                                   | 18+    | 447                                     | 564    | *    |
| Indonesia | 1993-1994  | Indonesian Family Life Surveys                                                                                 | National                     | both                 | 18+                                   | 18+    | 5738                                    | 7057   | †    |
| Indonesia | 1997-1998  | Indonesian Family Life Surveys                                                                                 | National                     | both                 | 18+                                   | 18+    | 7711                                    | 9480   | †    |
| Indonesia | 2000-2001  | Indonesian Family Life Surveys                                                                                 | National                     | both                 | 18+                                   | 18+    | 10569                                   | 11438  | †    |
| Indonesia | 2001       | Ng et al., Bull World Health Organ 84(4):305-13, 2006                                                          | Community                    | both                 | 18-74                                 | 18-74  | 1261                                    | 1234   | *    |
| Indonesia | 2001       | STEPS/SURKESNAS                                                                                                | National                     | both                 | 18-64                                 | 18-64  | 4100                                    | 4775   | *    |
| Indonesia | 2003       | A genetic-ecological study of the risk factors for lifestyle-related diseases in Oceanian populations, Study A | Community                    | rural                | 18-79                                 | 18-79  | 99                                      | 103    | *    |
| Indonesia | 2003       | A genetic-ecological study of the risk factors for lifestyle-related diseases in Oceanian populations, Study B | Community                    | rural                | 18-79                                 | 18-79  | 100                                     | 140    | *    |
| Indonesia | 2006       | Jakarta Non Communicable Disease Risk Factor Surveillance                                                      | Community                    | urban                | 25-64                                 | 25-64  | 641                                     | 950    | *    |
| Indonesia | 2007-2008  | Indonesian Family Life Surveys                                                                                 | National                     | both                 | 18+                                   | 18+    | 12715                                   | 14219  | †    |
| Indonesia | 2013       | Population Health Basic Health Research 2013 (Riskesdas 2013): ages 5-19 years                                 | National                     | both                 | 18-19                                 | 18-19  | 15350                                   | 14095  | *    |
| Indonesia | 2013       | Population Health Basic Health Research 2013 (Riskesdas 2013): ages 20 years and older                         | National                     | both                 | 20+                                   | 20+    | 299439                                  | 328085 | *    |
| Indonesia | 2014-2015  | Indonesian Family Life Surveys                                                                                 | National                     | both                 | 18+                                   | 18+    | 14126                                   | 15587  | †    |
| Iran      | 1990-1991  | National Health Survey I                                                                                       | National                     | both                 | 18                                    | 18     | 284                                     | 405    | *    |
| Iran      | 1997-1998  | Khadivzadeh, East Mediterr Health J 8(4-5):612-18, 2002                                                        | Community                    | urban                |                                       | 18-49  |                                         | 1513   | *    |
| Iran      | 1999-2000  | National Health Survey II                                                                                      | National                     | both                 | 18+                                   | 18+    | 13702                                   | 16618  | *    |
| Iran      | 1999-2001  | Tehran Lipid and Glucose Study                                                                                 | Community                    | urban                | 18+                                   | 18+    | 4555                                    | 6126   | *    |
| Iran      | 2000       | ASADABADI Study                                                                                                | Community                    | urban                | 18+                                   | 18+    | 132                                     | 168    | *    |
| Iran      | 2001       | Isfahan Healthy Heart Program, Arak                                                                            | Community                    | both                 | 19+                                   | 19+    | 3107                                    | 3204   | *    |
| Iran      | 2001       | Isfahan Healthy Heart Program, Isfahan                                                                         | Community                    | both                 | 19+                                   | 19+    | 1992                                    | 2145   | *    |
| Iran      | 2001       | Isfahan Healthy Heart Program, Najaf Abad                                                                      | Community                    | both                 | 19+                                   | 19+    | 978                                     | 987    | *    |
| Iran      | 2001       | Isfahan Healthy Heart Program in Students, Arak                                                                | Community                    | both                 | 18                                    | 18     | 19                                      | 6      | *    |
| Iran      | 2001       | Isfahan Healthy Heart Program in Students, Isfahan                                                             | Community                    | both                 | 18                                    |        | 7                                       |        | *    |
| Iran      | 2002-2005  | Tehran Lipid and Glucose Study                                                                                 | Community                    | urban                | 18+                                   | 18+    | 2153                                    | 2766   | *    |
| Iran      | 2003-2004  | Childhood and Adolescence Surveillance and Prevention of Adult Noncommunicable Disease (CASPIAN)               | National                     | both                 | 18                                    | 18     | 370                                     | 362    | *    |
| Iran      | 2003-2004  | The Persian Gulf Healthy Heart Study                                                                           | Subnational                  | urban                | 25-75                                 | 25-75  | 1736                                    | 1973   | *    |
| Iran      | 2004       | Hajian-Tilaki et al., Obes Rev 8(1):3-10, 2007                                                                 | Community                    | urban                | 20-70                                 | 20-70  | 1800                                    | 1800   | *    |
| Iran      | 2004-2008  | Golestan Cohort Study Main Phase                                                                               | Subnational                  | both                 | 40-75                                 | 40-75  | 21229                                   | 28808  | *    |
| Iran      | 2005       | Dastgiri et al., J Public Health Nutr 9: 996-1000, 2006                                                        | Subnational                  | urban                | 18-70                                 | 18-70  | 116                                     | 151    | *    |
| Iran      | 2005       | STEPS                                                                                                          | National                     | both                 | 18-64                                 | 18-64  | 37998                                   | 37520  | *    |
| Iran      | 2005-2006  | Rashidy-Pour, Obes Rev 10(1):2-6, 2009                                                                         | Subnational                  | both                 | 30-70                                 | 30-70  | 1695                                    | 2104   | *    |
| Iran      | 2005-2008  | Tehran Lipid and Glucose Study                                                                                 | Community                    | urban                | 18+                                   | 18+    | 2531                                    | 3259   | *    |
| Iran      | 2006       | STEPS                                                                                                          | National                     | both                 | 18-65                                 | 18-65  | 14130                                   | 14008  | *    |
| Iran      | 2007       | Isfahan Healthy Heart Program, Arak                                                                            | Community                    | both                 | 19+                                   | 19+    | 2452                                    | 2383   | *    |
| Iran      | 2007       | Isfahan Healthy Heart Program, Isfahan                                                                         | Community                    | both                 | 19+                                   | 19+    | 1464                                    | 1453   | *    |
| Iran      | 2007       | Isfahan Healthy Heart Program, Najaf Abad                                                                      | Community                    | both                 | 19+                                   | 19+    | 748                                     | 795    | *    |
| Iran      | 2007       | Isfahan Healthy Heart Program in Students, Arak                                                                | Community                    | both                 | 18                                    | 18     | 26                                      | 8      | *    |
| Iran      | 2007       | Isfahan Healthy Heart Program in Students, Isfahan                                                             | Community                    | both                 | 18                                    | 18     | 9                                       | 6      | *    |
| Iran      | 2007       | Isfahan Healthy Heart Program in Students, Najaf Abad                                                          | Community                    | both                 | 18                                    |        | 3                                       |        | *    |
| Iran      | 2007       | STEPS                                                                                                          | National                     | both                 | 18-64                                 | 18-64  | 2205                                    | 2193   | *    |
| Iran      | 2007       | STEPS                                                                                                          | National                     | both                 | 18-64                                 | 18-64  | 13839                                   | 13805  | *    |
| Iran      | 2008       | STEPS                                                                                                          | National                     | both                 | 18-64                                 | 18-64  | 13691                                   | 13601  | *    |
| Iran      | 2008-2009  | Zahedan city study                                                                                             | Community                    | urban                | 18+                                   | 18+    | 1131                                    | 1072   | *    |
| Iran      | 2008-2010  | Amol county study                                                                                              | Community                    | both                 | 18+                                   | 18+    | 3207                                    | 2499   | *    |
| Iran      | 2008-2010  | Tehran city study                                                                                              | Community                    | urban                | 18+                                   | 18+    | 392                                     | 500    | *    |
| Iran      | 2008-2011  | Tehran Lipid and Glucose Study                                                                                 | Community                    | urban                | 20+                                   | 20+    | 4622                                    | 5884   | *    |
| Iran      | 2009       | STEPS                                                                                                          | National                     | both                 | 18-64                                 | 18-64  | 13919                                   | 13716  | *    |
| Iran      | 2009-2010  | Childhood and Adolescence Surveillance and Prevention of Adult Noncommunicable Disease (CASPIAN)               | National                     | both                 | 18                                    | 18     | 497                                     | 524    | *    |
| Iran      | 2009-2010  | The Persian Gulf Healthy Heart Study                                                                           | Subnational                  | urban                | 31-79                                 | 31-79  | 834                                     | 1016   | *    |
| Iran      | 2010-2011  | The Yazd Eye Study                                                                                             | Subnational                  | both                 | 40-80                                 | 40-80  | 875                                     | 1012   | *    |
| Iran      | 2010-2012  | Golestan Cohort Study Second Phase                                                                             | Subnational                  | both                 | 43-82                                 | 43-82  | 5416                                    | 5980   | *    |
| Iran      | 2011       | STEPS                                                                                                          | National                     | both                 | 18-69                                 | 18-69  | 4075                                    | 5738   | *    |
| Iran      | 2011-2012  | Childhood and Adolescence Surveillance and Prevention of Adult Noncommunicable Disease (CASPIAN)               | National                     | both                 | 18                                    | 18     | 287                                     | 269    | *    |
| Iran      | 2012       | National Integrated Micronutrient Survey (NIMS) 2012                                                           | National                     | both                 | 18-60                                 | 18-60  | 6200                                    | 6518   | *    |
| Iran      | 2012-2014  | Pars Cohort Study                                                                                              | Community                    | rural                | 40-90                                 | 40-90  | 4272                                    | 4987   | *    |
| Iran      | 2013-2014  | Bushehr Elderly Health Program (BEH)                                                                           | Community                    | urban                | 60+                                   | 60+    | 1437                                    | 1514   | *    |

| Country | Data years | Survey/study name/citation                                                                       | Level of representative-ness | Rural, urban or both | Age range as used for global analysis |        | Sample size as used for global analysis |        | Note |
|---------|------------|--------------------------------------------------------------------------------------------------|------------------------------|----------------------|---------------------------------------|--------|-----------------------------------------|--------|------|
|         |            |                                                                                                  |                              |                      | Male                                  | Female | Male                                    | Female |      |
| Iran    | 2013-2014  | Gilan Eye Study                                                                                  | Subnational                  | both                 | 50+                                   | 50+    | 1059                                    | 1439   | *    |
| Iran    | 2013-2014  | Isfahan Salt Study (ISS)                                                                         | Community                    | urban                | 18-60                                 | 18-60  | 700                                     | 734    | *    |
| Iran    | 2014-2015  | Childhood and Adolescence Surveillance and Prevention of Adult Noncommunicable Disease (CASPIAN) | National                     | both                 | 18                                    | 18     | 329                                     | 386    | *    |
| Iran    | 2015       | Iranian School Measurement Database                                                              | National                     | both                 | 18                                    | 18     | 969                                     | 1815   | *    |
| Iran    | 2016       | STEPS                                                                                            | National                     | both                 | 18+                                   | 18+    | 14080                                   | 15036  | *    |
| Iraq    | 2006       | STEPS                                                                                            | National                     | both                 | 25-64                                 | 25-64  | 2251                                    | 2252   | *    |
| Iraq    | 2015       | STEPS                                                                                            | National                     | both                 | 18+                                   | 18+    | 1589                                    | 2312   | †    |
| Ireland | 1997-1999  | North/South Ireland Food Consumption Survey                                                      | National                     | both                 | 18-64                                 | 18-64  | 613                                     | 698    | *    |
| Ireland | 1998       | Survey of Lifestyle, Attitudes and Nutritional in Ireland 1998                                   | National                     | both                 | 18+                                   | 18+    | 123                                     | 296    | †    |
| Ireland | 2002       | Survey of Lifestyle, Attitudes and Nutritional in Ireland 2002                                   | National                     | both                 | 18+                                   | 18+    | 164                                     | 216    | †    |
| Ireland | 2006-2007  | Survey of Lifestyle, Attitudes and Nutritional in Ireland 2006-2007                              | National                     | both                 | 18+                                   | 18+    | 945                                     | 1225   | †    |
| Ireland | 2008-2010  | National Adult Nutrition Survey                                                                  | National                     | both                 | 18+                                   | 18+    | 657                                     | 695    | *    |
| Ireland | 2009-2011  | The Irish Longitudinal Study on Ageing                                                           | National                     | both                 | 50+                                   | 50+    | 2690                                    | 3168   | †    |
| Israel  | 1985-1986  | MONICA, Tel Aviv                                                                                 | Community                    | urban                | 35-64                                 | 35-64  | 653                                     | 685    | †    |
| Israel  | 1990-1991  | The Jerusalem Longitudinal Cohort Study                                                          | Community                    | urban                | 69-70                                 | 69-70  | 245                                     | 199    | *    |
| Israel  | 1997-1998  | The Jerusalem Longitudinal Cohort Study                                                          | Community                    | urban                | 76-77                                 | 76-77  | 422                                     | 429    | *    |
| Israel  | 1999-2001  | Mabat First Israeli National Health and Nutrition Survey                                         | National                     | both                 | 25-64                                 | 25-64  | 1367                                    | 1404   | *    |
| Israel  | 1999-2005  | The Israel Glucose Intolerance, Obesity and Hypertension Study                                   | National                     | urban                | 58+                                   | 58+    | 514                                     | 527    | *    |
| Israel  | 2002-2007  | Hadera District Study                                                                            | Subnational                  | urban                | 25-78                                 | 25-78  | 548                                     | 538    | *    |
| Israel  | 2003-2004  | Mabat Youth First Israeli National Health and Nutrition Survey in 7th-12th grade students        | National                     | both                 | 18                                    | 18     | 50                                      | 33     | *    |
| Israel  | 2005-2006  | The Jerusalem Longitudinal Cohort Study                                                          | Community                    | urban                | 83-85                                 | 83-85  | 490                                     | 584    | *    |
| Israel  | 2005-2006  | Mabat Zahav First National Health and Nutrition Survey in ages 65 and over                       | National                     | urban                | 65+                                   | 65+    | 743                                     | 819    | *    |
| Israel  | 2014-2015  | Mabat Second Israeli National Health and Nutrition Survey                                        | National                     | both                 | 18-64                                 | 18-64  | 1061                                    | 1073   | *    |
| Israel  | 2014-2015  | Mabat Zahav Second National Health and Nutrition Survey ages in 65 and over                      | National                     | both                 | 65+                                   | 65+    | 307                                     | 318    | *    |
| Israel  | 2015-2016  | Mabat Youth Second Israeli National Health and Nutrition Survey in 7th-12th grade students       | National                     | both                 | 18                                    | 18     | 46                                      | 33     | *    |
| Italy   | 1983-1996  | Malattie cardiovascolari Aterosclerotiche Istituto Superiore di Sanità                           | Community                    | rural                | 18-77                                 | 18-77  | 3948                                    | 4488   | *    |
| Italy   | 1985       | Finland, Italy, Netherlands, Elderly (Fine-Italy)                                                | Community                    | rural                | 65-84                                 |        | 650                                     |        | *    |
| Italy   | 1985       | INTERSALT, Naples                                                                                | Community                    | urban                | 20-59                                 | 20-59  | 100                                     | 100    | †    |
| Italy   | 1985-1988  | Pisa Epidemiological Study - first survey                                                        | Community                    | urban                | 18-90                                 | 18-90  | 1502                                    | 1755   | *    |
| Italy   | 1986       | INTERSALT, Bassiano                                                                              | Community                    | urban                | 20-59                                 | 20-59  | 99                                      | 100    | †    |
| Italy   | 1986       | INTERSALT, Gubbio                                                                                | Community                    | urban                | 20-59                                 | 20-59  | 99                                      | 100    | †    |
| Italy   | 1986       | INTERSALT, Mirano                                                                                | Community                    | urban                | 20-59                                 | 20-59  | 100                                     | 100    | †    |
| Italy   | 1986       | MONICA, Friuli                                                                                   | Subnational                  | urban                | 25-64                                 | 25-64  | 921                                     | 918    | †    |
| Italy   | 1986-1987  | MONICA, Brianza                                                                                  | Subnational                  | urban                | 25-64                                 | 25-64  | 814                                     | 832    | †    |
| Italy   | 1988-1991  | Po River Delta Epidemiological Study - second survey                                             | Community                    | rural                | 18-73                                 | 18-73  | 1142                                    | 1307   | *    |
| Italy   | 1989       | MONICA, Friuli                                                                                   | Subnational                  | urban                | 25-64                                 | 25-64  | 902                                     | 900    | †    |
| Italy   | 1989       | Ventimiglia Heart Study                                                                          | Community                    | rural                | 18+                                   | 18+    | 486                                     | 594    | *    |
| Italy   | 1989-1990  | MONICA, Brianza                                                                                  | Subnational                  | urban                | 25-64                                 | 25-64  | 787                                     | 786    | †    |
| Italy   | 1990       | Bruneck Study                                                                                    | Community                    | rural                | 40-79                                 | 40-79  | 469                                     | 450    | *    |
| Italy   | 1991-1993  | Pisa Epidemiological Study - second survey                                                       | Community                    | urban                | 18-97                                 | 18-97  | 1164                                    | 1440   | *    |
| Italy   | 1992-1993  | Italian Longitudinal Study on Aging                                                              | National                     | both                 | 65-84                                 | 65-84  | 1666                                    | 1455   | *    |
| Italy   | 1992-1998  | Vobarno Study                                                                                    | Community                    | both                 | 25-64                                 | 35-64  | 265                                     | 309    | *    |
| Italy   | 1993-1994  | MONICA, Brianza                                                                                  | Subnational                  | urban                | 25-64                                 | 25-64  | 801                                     | 856    | †    |
| Italy   | 1993-1998  | EPIC Florence                                                                                    | Community                    | urban                | 24-72                                 | 24-72  | 3498                                    | 9968   | *    |
| Italy   | 1994       | MONICA, Friuli                                                                                   | Subnational                  | urban                | 25-64                                 | 25-64  | 882                                     | 888    | †    |
| Italy   | 1995       | Bruneck Study                                                                                    | Community                    | rural                | 45-84                                 | 45-84  | 411                                     | 408    | *    |
| Italy   | 1995-1996  | Italian Longitudinal Study on Aging                                                              | National                     | both                 | 68-90                                 | 68-90  | 1011                                    | 808    | *    |
| Italy   | 1995-1999  | PROgetto Veneto Anziani (PROVA)                                                                  | Subnational                  | both                 | 65+                                   | 65+    | 1187                                    | 1722   | *    |
| Italy   | 1997-1999  | Lucca CUORE Study                                                                                | Community                    | urban                | 18-84                                 | 18-84  | 897                                     | 1123   | *    |
| Italy   | 1998-1999  | progetto VIP                                                                                     | Community                    | both                 | 25-74                                 | 25-74  | 599                                     | 600    | *    |
| Italy   | 1998-2000  | InCHIANTI study                                                                                  | Community                    | both                 | 18+                                   | 18+    | 560                                     | 681    | *    |
| Italy   | 1998-2002  | Osservatorio Epidemiologico Cardiovascolare                                                      | National                     | both                 | 35-74                                 | 35-74  | 4870                                    | 4752   | *    |
| Italy   | 2000       | Bruneck Study                                                                                    | Community                    | rural                | 50-89                                 | 50-89  | 331                                     | 361    | *    |
| Italy   | 2000-2001  | Italian Longitudinal Study on Aging                                                              | National                     | both                 | 73-93                                 | 73-93  | 557                                     | 473    | *    |
| Italy   | 2000-2003  | PROgetto Veneto Anziani (PROVA)                                                                  | Subnational                  | both                 | 67+                                   | 67+    | 795                                     | 1331   | *    |
| Italy   | 2001-2003  | The Study of Asti                                                                                | Community                    | both                 | 45-64                                 | 45-64  | 780                                     | 878    | *    |
| Italy   | 2002-2005  | PROgetto Veneto Anziani (PROVA)                                                                  | Subnational                  | both                 | 68+                                   | 68+    | 621                                     | 1138   | *    |
| Italy   | 2003       | The European Male Ageing Study                                                                   | Community                    | both                 | 40+                                   |        | 433                                     |        | *    |
| Italy   | 2004-2005  | Italian Project on the Epidemiology of Alzheimer's disease                                       | National                     | both                 | 65-84                                 | 65-84  | 1569                                    | 1421   | *    |

| Country | Data years | Survey/study name/citation                                                          | Level of representative-ness | Rural, urban or both | Age range as used for global analysis |        | Sample size as used for global analysis |        | Note |
|---------|------------|-------------------------------------------------------------------------------------|------------------------------|----------------------|---------------------------------------|--------|-----------------------------------------|--------|------|
|         |            |                                                                                     |                              |                      | Male                                  | Female | Male                                    | Female |      |
| Italy   | 2004-2005  | Vobarno study                                                                       | Community                    | rural                | 55-74                                 | 55-74  | 99                                      | 113    | *    |
| Italy   | 2004-2008  | Cardiolab project                                                                   | National                     | urban                | 40+                                   | 40+    | 19152                                   | 14782  | *    |
| Italy   | 2005       | Bruneck Study                                                                       | Community                    | rural                | 55-93                                 | 55-93  | 264                                     | 307    | *    |
| Italy   | 2005-2007  | Moli-family Study                                                                   | Subnational                  | both                 | 18-35                                 | 18-35  | 98                                      | 124    | *    |
| Italy   | 2005-2010  | Moli-sani Study                                                                     | Subnational                  | both                 | 35+                                   | 35+    | 11694                                   | 12614  | *    |
| Italy   | 2008       | The European Male Ageing Study                                                      | Community                    | both                 | 40+                                   |        | 346                                     |        | *    |
| Italy   | 2008-2009  | progetto VIP                                                                        | Community                    | both                 | 25-74                                 | 25-74  | 596                                     | 596    | *    |
| Italy   | 2008-2012  | Osservatorio Epidemiologico Cardiovascolare/Health Examination Survey               | National                     | both                 | 35-80                                 | 35-80  | 4367                                    | 4332   | *    |
| Italy   | 2009-2010  | Grosso et al., J Epidemiol 24(4):327-33, 2014                                       | Community                    | both                 | 19+                                   | 19+    | 760                                     | 1129   | *    |
| Italy   | 2009-2011  | Pisa Epidemiological Study - third survey                                           | Community                    | urban                | 18+                                   | 18+    | 482                                     | 556    | *    |
| Italy   | 2010       | Bruneck Study                                                                       | Community                    | rural                | 60-98                                 | 60-98  | 225                                     | 259    | *    |
| Italy   | 2010-2012  | CARDiovascular risk MEtabolic syndrome LIver and Autoimmunity diseases (CA.ME.LI.A) | Community                    | both                 | 18-75                                 | 18-75  | 477                                     | 515    | *    |
| Italy   | 2011-2012  | Vobarno study                                                                       | Community                    | rural                | 49-62                                 | 49-62  | 107                                     | 143    | *    |
| Italy   | 2014-2016  | Mediterranean healthy Eating, Aging and Lifestyles (MEAL) study                     | Subnational                  | urban                | 20+                                   | 20+    | 762                                     | 762    | *    |
| Italy   | 2015       | Bruneck Study                                                                       | Community                    | rural                | 65-98                                 | 65-98  | 171                                     | 169    | *    |
| Jamaica | 1993       | Zohoori et al., West Indian Med J 52(2):111-17, 2003                                | Community                    | urban                | 25-74                                 | 25-74  | 845                                     | 1245   | *    |
| Jamaica | 1994-1995  | Cooper et al., Am J Public Health 87(2):160-68, 1997                                | Community                    | urban                | 25-100                                | 25-100 | 597                                     | 833    | *    |
| Jamaica | 1998       | Ragoobirsingh et al., Diabetes Obes Metab 6(1):23-27, 2004                          | National                     | both                 | 18+                                   | 18+    | 552                                     | 945    | *    |
| Jamaica | 2000-2001  | Jamaica Health and Lifestyle Survey                                                 | National                     | both                 | 18-74                                 | 18-74  | 607                                     | 1227   | *    |
| Jamaica | 2006-2007  | Jamaica Youth Risk and Resiliency Behaviour Survey 2006                             | National                     | both                 | 18-19                                 | 18-19  | 150                                     | 188    | *    |
| Jamaica | 2007-2008  | Jamaica Health and Lifestyle Survey                                                 | National                     | both                 | 18-74                                 | 18-74  | 821                                     | 1822   | *    |
| Jamaica | 2012       | Older Persons in Jamaica 2012                                                       | National                     | both                 | 60+                                   | 60+    | 157                                     | 203    | 11*  |
| Japan   | 1982       | National Nutrition Survey                                                           | National                     | both                 | 18+                                   | 18+    | 4755                                    | 6709   | 1*   |
| Japan   | 1983       | National Nutrition Survey                                                           | National                     | both                 | 18+                                   | 18+    | 4579                                    | 6548   | 1*   |
| Japan   | 1984       | National Nutrition Survey                                                           | National                     | both                 | 18+                                   | 18+    | 4537                                    | 6286   | 1*   |
| Japan   | 1985       | INTERSALT, Osaka                                                                    | Community                    | urban                | 20-59                                 | 20-59  | 100                                     | 97     | †    |
| Japan   | 1985       | INTERSALT, Tochigi                                                                  | Community                    | urban                | 20-59                                 | 20-59  | 95                                      | 99     | †    |
| Japan   | 1985       | INTERSALT, Toyama                                                                   | Community                    | urban                | 20-59                                 | 20-59  | 100                                     | 100    | †    |
| Japan   | 1985       | National Nutrition Survey                                                           | National                     | both                 | 18+                                   | 18+    | 5383                                    | 6869   | *    |
| Japan   | 1985-1986  | Akabane Study                                                                       | Community                    | urban                | 40-69                                 | 40-69  | 812                                     | 1022   | *    |
| Japan   | 1986       | National Nutrition Survey                                                           | National                     | both                 | 18+                                   | 18+    | 5275                                    | 6741   | *    |
| Japan   | 1987       | Konan Town Study                                                                    | Community                    | rural                | 20-79                                 | 20-79  | 70                                      | 88     | *    |
| Japan   | 1987       | National Nutrition Survey                                                           | National                     | both                 | 18+                                   | 18+    | 4721                                    | 6486   | *    |
| Japan   | 1988       | Konan Town Study                                                                    | Community                    | rural                | 20-79                                 | 20-79  | 76                                      | 85     | *    |
| Japan   | 1988       | National Nutrition Survey                                                           | National                     | both                 | 18+                                   | 18+    | 5126                                    | 6397   | *    |
| Japan   | 1989       | Aito Town Study                                                                     | Community                    | rural                | 18-74                                 | 18-84  | 529                                     | 525    | *    |
| Japan   | 1989       | Konan Town Study                                                                    | Community                    | rural                | 20-79                                 | 20-79  | 58                                      | 63     | *    |
| Japan   | 1989       | National Nutrition Survey                                                           | National                     | both                 | 18+                                   | 18+    | 4325                                    | 5571   | *    |
| Japan   | 1990       | Konan Town Study                                                                    | Community                    | rural                | 20-79                                 | 20-79  | 27                                      | 51     | *    |
| Japan   | 1990       | National Nutrition Survey                                                           | National                     | both                 | 18+                                   | 18+    | 4583                                    | 5928   | *    |
| Japan   | 1990-1994  | Japan Public Health Center-based prospective Study (JPHC Study), Cohort I           | Subnational                  | both                 | 40-59                                 | 40-59  | 8749                                    | 14481  | *    |
| Japan   | 1991       | Konan Town Study                                                                    | Community                    | rural                | 20-79                                 | 20-79  | 93                                      | 116    | *    |
| Japan   | 1991       | Shigaraki Town Study                                                                | Community                    | rural                | 30-89                                 | 30-89  | 230                                     | 319    | *    |
| Japan   | 1991       | National Nutrition Survey                                                           | National                     | both                 | 18+                                   | 18+    | 4667                                    | 5860   | *    |
| Japan   | 1992       | Konan Town Study                                                                    | Community                    | rural                | 20-79                                 | 20-79  | 45                                      | 47     | *    |
| Japan   | 1992       | Shigaraki Town Study                                                                | Community                    | rural                | 30-89                                 | 30-89  | 288                                     | 385    | *    |
| Japan   | 1992       | National Nutrition Survey                                                           | National                     | both                 | 18+                                   | 18+    | 4348                                    | 5458   | *    |
| Japan   | 1993       | Konan Town Study                                                                    | Community                    | rural                | 20-79                                 | 20-79  | 54                                      | 65     | *    |
| Japan   | 1993       | Shigaraki Town Study                                                                | Community                    | rural                | 30-89                                 | 30-89  | 301                                     | 452    | *    |
| Japan   | 1993       | National Nutrition Survey                                                           | National                     | both                 | 18+                                   | 18+    | 4414                                    | 5519   | *    |
| Japan   | 1993-1994  | Japan Public Health Center-based prospective Study (JPHC Study), Cohort II          | Subnational                  | both                 | 40-69                                 | 40-69  | 8534                                    | 16190  | *    |
| Japan   | 1994       | Japanese Population-Based Osteoporosis Study                                        | Subnational                  | both                 |                                       | 18-79  |                                         | 3222   | *    |
| Japan   | 1994       | Konan Town Study                                                                    | Community                    | rural                | 20-79                                 | 20-79  | 43                                      | 59     | *    |
| Japan   | 1994       | Shigaraki Town Study                                                                | Community                    | rural                | 30-89                                 | 30-89  | 251                                     | 336    | *    |
| Japan   | 1994       | National Nutrition Survey                                                           | National                     | both                 | 18+                                   | 18+    | 4303                                    | 5318   | *    |
| Japan   | 1995       | Konan Town Study                                                                    | Community                    | rural                | 20-79                                 | 20-79  | 45                                      | 61     | *    |
| Japan   | 1995       | Shigaraki Town Study                                                                | Community                    | rural                | 30-89                                 | 30-89  | 300                                     | 470    | *    |
| Japan   | 1995       | National Nutrition Survey                                                           | National                     | both                 | 18+                                   | 18+    | 4326                                    | 5286   | *    |
| Japan   | 1996       | Shigaraki Town Study                                                                | Community                    | rural                | 30-89                                 | 30-89  | 86                                      | 152    | *    |

| Country    | Data years | Survey/study name/citation                                       | Level of representative-ness | Rural, urban or both | Age range as used for global analysis |        | Sample size as used for global analysis |         | Note |
|------------|------------|------------------------------------------------------------------|------------------------------|----------------------|---------------------------------------|--------|-----------------------------------------|---------|------|
|            |            |                                                                  |                              |                      | Male                                  | Female | Male                                    | Female  |      |
| Japan      | 1996       | National Nutrition Survey                                        | National                     | both                 | 18+                                   | 18+    | 4303                                    | 5230    | *    |
| Japan      | 1996-1997  | INTERMAP, AitoTown                                               | Community                    | rural                | 40-59                                 | 40-59  | 130                                     | 129     | †    |
| Japan      | 1997       | Shigaraki Town Study                                             | Community                    | rural                | 30-89                                 | 30-89  | 61                                      | 100     | *    |
| Japan      | 1997       | National Nutrition Survey                                        | National                     | both                 | 18+                                   | 18+    | 4173                                    | 5161    | *    |
| Japan      | 1997-1998  | INTERMAP, Sapporo                                                | Community                    | urban                | 40-59                                 | 40-59  | 149                                     | 148     | †    |
| Japan      | 1997-1998  | INTERMAP, Toyama                                                 | Community                    | urban                | 40-59                                 | 40-59  | 149                                     | 150     | †    |
| Japan      | 1997-1998  | INTERMAP, Wakayama                                               | Community                    | urban                | 40-59                                 | 40-59  | 146                                     | 144     | †    |
| Japan      | 1997-2000  | Sudo et al., J Orthop Sci 13(5):413-18, 2008                     | Community                    | rural                | 55+                                   | 45+    | 261                                     | 785     | *    |
| Japan      | 1998       | Niigata Study                                                    | Community                    | urban                | 70                                    | 70     | 287                                     | 284     | *    |
| Japan      | 1998       | National Nutrition Survey                                        | National                     | both                 | 18+                                   | 18+    | 4407                                    | 5327    | *    |
| Japan      | 1999       | Niigata Study                                                    | Community                    | urban                | 71                                    | 71     | 245                                     | 216     | *    |
| Japan      | 1999       | National Nutrition Survey                                        | National                     | both                 | 18+                                   | 18+    | 3610                                    | 4635    | *    |
| Japan      | 2000       | Niigata Study                                                    | Community                    | urban                | 72                                    | 72     | 233                                     | 202     | *    |
| Japan      | 2000       | National Nutrition Survey                                        | National                     | both                 | 18+                                   | 18+    | 3863                                    | 4612    | *    |
| Japan      | 2001       | The Japan Association of Health Service Database                 | Subnational                  | both                 | 20+                                   | 20+    | 1471868                                 | 1231378 | *    |
| Japan      | 2001       | Niigata Study                                                    | Community                    | urban                | 73                                    | 73     | 235                                     | 201     | *    |
| Japan      | 2001       | National Nutrition Survey                                        | National                     | both                 | 18+                                   | 18+    | 3708                                    | 4675    | *    |
| Japan      | 2002       | Niigata Study                                                    | Community                    | urban                | 74                                    | 74     | 228                                     | 202     | *    |
| Japan      | 2002       | National Nutrition Survey                                        | National                     | both                 | 18+                                   | 18+    | 3472                                    | 4279    | *    |
| Japan      | 2002-2003  | The Hisayama Study                                               | Community                    | rural                | 40+                                   | 40+    | 1414                                    | 1884    | *    |
| Japan      | 2003       | National Health and Nutrition Survey                             | National                     | both                 | 18+                                   | 18+    | 3432                                    | 4307    | *    |
| Japan      | 2003       | Niigata Study                                                    | Community                    | urban                | 75                                    | 75     | 215                                     | 189     | *    |
| Japan      | 2004       | National Health and Nutrition Survey                             | National                     | both                 | 18+                                   | 18+    | 2816                                    | 3467    | *    |
| Japan      | 2004       | Niigata Study                                                    | Community                    | urban                | 76                                    | 76     | 215                                     | 185     | *    |
| Japan      | 2005       | National Health and Nutrition Survey                             | National                     | both                 | 18+                                   | 18+    | 2592                                    | 3207    | *    |
| Japan      | 2005       | Niigata Study                                                    | Community                    | urban                | 77                                    | 77     | 203                                     | 184     | *    |
| Japan      | 2006       | National Health and Nutrition Survey                             | National                     | both                 | 18+                                   | 18+    | 2964                                    | 3641    | *    |
| Japan      | 2006       | Niigata Study                                                    | Community                    | urban                | 78                                    | 78     | 199                                     | 194     | *    |
| Japan      | 2007       | National Health and Nutrition Survey                             | National                     | both                 | 18+                                   | 18+    | 2990                                    | 3606    | *    |
| Japan      | 2007       | Niigata Study                                                    | Community                    | urban                | 79                                    | 79     | 183                                     | 192     | *    |
| Japan      | 2008       | Resident in Kanazawa City (age 40+)                              | Community                    | urban                | 40+                                   | 40+    | 6562                                    | 11944   | *    |
| Japan      | 2008       | National Health and Nutrition Survey                             | National                     | both                 | 18+                                   | 18+    | 3058                                    | 3739    | *    |
| Japan      | 2008       | Niigata Study                                                    | Community                    | urban                | 80                                    | 80     | 174                                     | 180     | *    |
| Japan      | 2009       | National Health and Nutrition Survey                             | National                     | both                 | 18+                                   | 18+    | 2978                                    | 3685    | *    |
| Japan      | 2010       | National Health and Nutrition Survey                             | National                     | both                 | 18+                                   | 18+    | 2766                                    | 3406    | *    |
| Japan      | 2011       | National Health and Nutrition Survey                             | National                     | both                 | 18+                                   | 18+    | 2620                                    | 3178    | *    |
| Japan      | 2011       | The Tokyo Health Service Association Database                    | Community                    | urban                | 20+                                   | 20+    | 82453                                   | 54028   | *    |
| Japan      | 2012       | National Health and Nutrition Survey                             | National                     | both                 | 18+                                   | 18+    | 9817                                    | 12182   | *    |
| Japan      | 2013       | National Health and Nutrition Survey                             | National                     | both                 | 18+                                   | 18+    | 2774                                    | 3250    | *    |
| Japan      | 2014       | National Health and Nutrition Survey                             | National                     | both                 | 18+                                   | 18+    | 2802                                    | 3268    | *    |
| Japan      | 2014-2015  | Nagaoka Health Screening                                         | Community                    | both                 | 20-89                                 | 20-89  | 4938                                    | 4298    | *    |
| Japan      | 2015       | National Health and Nutrition Survey                             | National                     | both                 | 18+                                   | 18+    | 2518                                    | 3071    | *    |
| Jordan     | 1994-1996  | Ailouni et al., Int J Obes Relat Metab Disord 22(7):624-28, 1998 | Subnational                  | both                 | 25+                                   | 25+    | 1047                                    | 1787    | *    |
| Jordan     | 1997       | DHS                                                              | National                     | both                 |                                       | 20-49  |                                         | 3002    | †    |
| Jordan     | 2002       | DHS                                                              | National                     | both                 |                                       | 20-49  |                                         | 4839    | †    |
| Jordan     | 2004       | Khader et al., Metab Syndr Relat Disord 6(2):113-20, 2008        | Community                    | both                 | 25+                                   | 25-59  | 394                                     | 548     | *    |
| Jordan     | 2004       | Behavioural Risk Factor Surveillance Survey                      | National                     | both                 | 18+                                   | 18+    | 236                                     | 472     | *    |
| Jordan     | 2007       | Behavioural Risk Factor Surveillance Survey                      | National                     | both                 | 18+                                   | 18+    | 330                                     | 433     | *    |
| Jordan     | 2007       | DHS                                                              | National                     | both                 |                                       | 20-49  |                                         | 4451    | †    |
| Jordan     | 2009       | DHS                                                              | National                     | both                 |                                       | 20-49  |                                         | 4054    | †    |
| Jordan     | 2009       | Metabolic abnormalities and vitamin D study                      | National                     | both                 | 18+                                   | 18+    | 1144                                    | 3350    | *    |
| Jordan     | 2012       | DHS                                                              | National                     | both                 |                                       | 20-49  |                                         | 6357    | †    |
| Jordan     | 2016-2017  | National Cardiovascular Diseases and Diabetes Study (NCDDS)      | National                     | both                 | 18+                                   | 18+    | 1187                                    | 2745    | *    |
| Kazakhstan | 1985       | Balakhmetova et al., Ter Arkh 63(1):17-20, 1991                  | Community                    | urban                | 20-54                                 |        | 2886                                    |         | *    |
| Kazakhstan | 1995       | DHS                                                              | National                     | both                 |                                       | 18-49  |                                         | 3138    | †    |
| Kazakhstan | 1999       | DHS                                                              | National                     | both                 |                                       | 18-49  |                                         | 2005    | †    |
| Kazakhstan | 2015       | Almaty STEPS                                                     | Subnational                  | both                 | 18-69                                 | 18-69  | 383                                     | 1144    | *    |
| Kazakhstan | 2015       | Shymkent STEPS                                                   | Subnational                  | both                 | 18-69                                 | 18-69  | 400                                     | 808     | *    |
| Kazakhstan | 2015-2016  | Aktobe STEPS                                                     | Subnational                  | both                 | 18-69                                 | 18-69  | 348                                     | 1153    | *    |

| Country          | Data years | Survey/study name/citation                                                            | Level of representative-ness | Rural, urban or both | Age range as used for global analysis |        | Sample size as used for global analysis |        | Note |
|------------------|------------|---------------------------------------------------------------------------------------|------------------------------|----------------------|---------------------------------------|--------|-----------------------------------------|--------|------|
|                  |            |                                                                                       |                              |                      | Male                                  | Female | Male                                    | Female |      |
| Kenya            | 1985       | INTERSALT                                                                             | Community                    | rural                | 20-59                                 | 20-59  | 90                                      | 86     | †    |
| Kenya            | 1993       | DHS                                                                                   | National                     | both                 |                                       | 20-49  |                                         | 3113   | †    |
| Kenya            | 1998       | DHS                                                                                   | National                     | both                 |                                       | 20-49  |                                         | 3009   | †    |
| Kenya            | 2003       | DHS                                                                                   | National                     | both                 |                                       | 18-49  |                                         | 6227   | †    |
| Kenya            | 2008-2009  | DHS                                                                                   | National                     | both                 |                                       | 18-49  |                                         | 6795   | †    |
| Kenya            | 2014       | DHS                                                                                   | National                     | both                 |                                       | 18-49  |                                         | 11772  | †    |
| Kenya            | 2015       | STEPS                                                                                 | National                     | both                 | 18-69                                 | 18-69  | 1751                                    | 2514   | †    |
| Kiribati         | 2004       | STEPS                                                                                 | National                     | both                 | 18-64                                 | 18-64  | 729                                     | 895    | †    |
| Kiribati         | 2015-2016  | STEPS                                                                                 | National                     | both                 | 18-69                                 | 18-69  | 557                                     | 694    | †    |
| Kuwait           | 1993-1994  | al-Isa, Ann Nutr Metab 41(5):307-14, 1997                                             | Community                    | both                 | 18+                                   |        | 1730                                    |        | *    |
| Kuwait           | 1995-1996  | Abdella et al., Diabetes Res and Clin Pract 42(3):187-196, 1998                       | Subnational                  | both                 | 20-84                                 | 20-84  | 1099                                    | 1892   | *    |
| Kuwait           | 1998       | Abiaka et al., Biol Trace Elem Res 91(1):33-43, 2003                                  | National                     | both                 | 18-80                                 | 18-80  | 178                                     | 233    | *    |
| Kuwait           | 2001       | Kuwait nutrition surveillance system                                                  | National                     | both                 | 18                                    | 18     | 124                                     | 132    | *    |
| Kuwait           | 2002       | Kuwait nutrition surveillance system                                                  | National                     | both                 | 18                                    | 18     | 97                                      | 93     | *    |
| Kuwait           | 2003       | Kuwait nutrition surveillance system                                                  | National                     | both                 | 18                                    | 18     | 196                                     | 175    | *    |
| Kuwait           | 2004       | Kuwait nutrition surveillance system                                                  | National                     | both                 | 18                                    | 18     | 124                                     | 112    | *    |
| Kuwait           | 2005       | Kuwait nutrition surveillance system                                                  | National                     | both                 | 18                                    | 18     | 170                                     | 179    | *    |
| Kuwait           | 2006       | Kuwait nutrition surveillance system                                                  | National                     | both                 | 18                                    | 18     | 134                                     | 152    | *    |
| Kuwait           | 2006       | STEPS                                                                                 | National                     | both                 | 20-65                                 | 20-65  | 918                                     | 1298   | †    |
| Kuwait           | 2007       | Kuwait nutrition surveillance system                                                  | National                     | both                 | 18                                    | 18     | 138                                     | 117    | *    |
| Kuwait           | 2008       | Kuwait nutrition surveillance system                                                  | National                     | both                 | 18                                    | 18     | 84                                      | 107    | *    |
| Kuwait           | 2008-2009  | National Nutrition Program for the State of Kuwait                                    | National                     | urban                | 18+                                   | 18+    | 484                                     | 568    | *    |
| Kuwait           | 2008-2010  | Gulf Cooperation Council World Health Survey                                          | National                     | both                 | 18+                                   | 18+    | 1598                                    | 1782   | *    |
| Kuwait           | 2009       | Kuwait nutrition surveillance system                                                  | National                     | both                 | 18                                    | 18     | 78                                      | 109    | *    |
| Kuwait           | 2014       | STEPS                                                                                 | National                     | both                 | 18-69                                 | 18-69  | 1382                                    | 2212   | †    |
| Kyrgyzstan       | 1993       | Kyrgyzstan Multipurpose Poverty Surveys                                               | National                     | both                 | 18-60                                 | 18-60  | 2457                                    | 2457   | *    |
| Kyrgyzstan       | 1997       | DHS                                                                                   | National                     | both                 |                                       | 18-49  |                                         | 3120   | †    |
| Kyrgyzstan       | 2012       | DHS                                                                                   | National                     | both                 |                                       | 18-49  |                                         | 6489   | †    |
| Kyrgyzstan       | 2013       | STEPS                                                                                 | National                     | both                 | 25-64                                 | 25-64  | 942                                     | 1600   | †    |
| Lao PDR          | 2006       | Multiple Indicator Cluster Survey 3                                                   | National                     | both                 |                                       | 18-49  |                                         | 698    | †    |
| Lao PDR          | 2008       | STEPS                                                                                 | Community                    | both                 | 25-64                                 | 25-64  | 1568                                    | 2353   | †    |
| Lao PDR          | 2013       | STEPS                                                                                 | National                     | both                 | 18-64                                 | 18-64  | 984                                     | 1461   | †    |
| Latvia           | 1997       | Nutrition and Lifestyle in the Baltic Republics, WHO, 1997                            | National                     | both                 | 19-50                                 | 19-50  | 703                                     | 732    | *    |
| Latvia           | 2008-2009  | Cardiovascular risk factor study                                                      | National                     | both                 | 25-74                                 | 25-74  | 1362                                    | 2398   | *    |
| Lebanon          | 1997       | Population and Housing Survey                                                         | National                     | both                 | 18+                                   | 18+    | 529                                     | 778    | *    |
| Lebanon          | 2008-2009  | STEPS                                                                                 | National                     | both                 | 18+                                   | 18+    | 1319                                    | 1476   | *    |
| Lebanon          | 2017       | STEPS                                                                                 | National                     | both                 | 18-69                                 | 18-69  | 729                                     | 983    | †    |
| Lesotho          | 1993       | National survey on iodine, vitamin A and iron status of women and children in Lesotho | National                     | both                 |                                       | 20-65  |                                         | 792    | *    |
| Lesotho          | 2004-2005  | DHS                                                                                   | National                     | both                 |                                       | 18-49  |                                         | 2702   | †    |
| Lesotho          | 2009-2010  | DHS                                                                                   | National                     | both                 | 18-59                                 | 18-49  | 2704                                    | 3200   | †    |
| Lesotho          | 2012       | STEPS                                                                                 | National                     | both                 | 25-64                                 | 25-64  | 726                                     | 1442   | †    |
| Lesotho          | 2014       | DHS                                                                                   | National                     | both                 | 18-59                                 | 18-49  | 2439                                    | 2762   | †    |
| Liberia          | 2006-2007  | DHS                                                                                   | National                     | both                 |                                       | 18-49  |                                         | 5674   | †    |
| Liberia          | 2011       | STEPS                                                                                 | National                     | both                 | 25-64                                 | 25-64  | 998                                     | 1254   | †    |
| Liberia          | 2013       | DHS                                                                                   | National                     | both                 | 18-49                                 | 18-49  | 3675                                    | 4142   | †    |
| Libya            | 1998-1999  | Kadiki et al., Diabetes Metab 27(6):647-54, 2001                                      | Community                    | both                 | 18+                                   | 18+    | 228                                     | 398    | *    |
| Libya            | 2009       | STEPS                                                                                 | National                     | both                 | 25-64                                 | 25-64  | 1678                                    | 1564   | †    |
| Lithuania        | 1986-1987  | MONICA, Kaunas                                                                        | Community                    | urban                | 35-64                                 | 35-64  | 894                                     | 868    | †    |
| Lithuania        | 1987       | Countrywide Integrated Noncommunicable Diseases Intervention (CINDI) Programme        | Subnational                  | rural                | 25-64                                 | 25-64  | 1220                                    | 1434   | *    |
| Lithuania        | 1992-1993  | MONICA, Kaunas                                                                        | Community                    | urban                | 35-64                                 | 35-64  | 610                                     | 621    | †    |
| Lithuania        | 1992-1993  | Countrywide Integrated Noncommunicable Diseases Intervention (CINDI) Programme        | Subnational                  | rural                | 25-64                                 | 25-64  | 617                                     | 798    | *    |
| Lithuania        | 1997       | Pomerleau, 2000                                                                       | National                     | both                 | 19+                                   | 19+    | 966                                     | 1130   | *    |
| Lithuania        | 1998-1999  | Countrywide Integrated Noncommunicable Diseases Intervention (CINDI) Programme        | Subnational                  | rural                | 25-64                                 | 25-64  | 816                                     | 1021   | *    |
| Lithuania        | 2001-2002  | MONICA4                                                                               | Community                    | urban                | 35-64                                 | 35-64  | 625                                     | 776    | *    |
| Lithuania        | 2002       | Pomerleau et al., Public Health Nutr 3:3-10, 2000                                     | National                     | both                 | 24-70                                 | 24-70  | 977                                     | 928    | *    |
| Lithuania        | 2006-2007  | Countrywide Integrated Noncommunicable Diseases Intervention (CINDI) Programme        | Subnational                  | rural                | 25-64                                 | 25-64  | 718                                     | 972    | *    |
| Lithuania        | 2006-2008  | Health, Alcohol and Psychosocial factors In Eastern Europe (HAPIEE)                   | Community                    | urban                | 45-75                                 | 45-75  | 3231                                    | 3874   | *    |
| Luxembourg       | 2007-2009  | Observation of cardiovascular risk factors in Luxembourg (ORISCAV-LUX)                | National                     | both                 | 18-69                                 | 18-69  | 696                                     | 735    | *    |
| Macedonia (TFYR) | 1999       | Multiple Indicator Cluster Survey                                                     | National                     | both                 |                                       | 18-45  |                                         | 1029   | *    |

| Country          | Data years | Survey/study name/citation                                                            | Level of representative-ness | Rural, urban or both | Age range as used for global analysis |        | Sample size as used for global analysis |        | Note |
|------------------|------------|---------------------------------------------------------------------------------------|------------------------------|----------------------|---------------------------------------|--------|-----------------------------------------|--------|------|
|                  |            |                                                                                       |                              |                      | Male                                  | Female | Male                                    | Female |      |
| Madagascar       | 1997       | Mauny et al., Ann Trop Med Parasitol 97(6):645-54, 2003                               | Community                    | both                 | 18+                                   | 18+    | 248                                     | 283    | *    |
| Madagascar       | 1997       | DHS                                                                                   | National                     | both                 |                                       | 20-49  |                                         | 2253   | †    |
| Madagascar       | 2003-2004  | DHS                                                                                   | National                     | both                 |                                       | 18-49  |                                         | 6366   | †    |
| Madagascar       | 2005       | STEPS                                                                                 | Subnational                  | both                 | 25-64                                 | 25-64  | 2596                                    | 2494   | †    |
| Madagascar       | 2008-2009  | DHS                                                                                   | National                     | both                 |                                       | 18-49  |                                         | 6723   | †    |
| Malawi           | 1992       | DHS                                                                                   | National                     | both                 |                                       | 20-49  |                                         | 2102   | †    |
| Malawi           | 1996       | Chilima et al., Eur J Clin Nutr 52(9):643-9, 1998                                     | Community                    | rural                | 55-94                                 | 55-94  | 86                                      | 185    | *    |
| Malawi           | 2000       | DHS                                                                                   | National                     | both                 |                                       | 18-49  |                                         | 9973   | †    |
| Malawi           | 2004       | DHS                                                                                   | National                     | both                 |                                       | 18-49  |                                         | 8563   | †    |
| Malawi           | 2009       | STEPS                                                                                 | National                     | both                 | 25-64                                 | 25-64  | 1666                                    | 3189   | †    |
| Malawi           | 2010       | DHS                                                                                   | National                     | both                 |                                       | 18-49  |                                         | 6006   | †    |
| Malawi           | 2013-2017  | NCD Survey Malawi Epidemiology and Intervention Research Unit                         | Community                    | both                 | 18+                                   | 18+    | 11651                                   | 17798  | *    |
| Malawi           | 2015-2016  | DHS                                                                                   | National                     | both                 |                                       | 18-49  |                                         | 6451   | †    |
| Malawi           | 2017       | STEPS                                                                                 | National                     | both                 | 18-70                                 | 18-70  | 1478                                    | 2534   | †    |
| Malaysia         | 1996       | National Health and Morbidity Survey (NHMS)                                           | National                     | both                 | 18+                                   | 18+    | 14520                                   | 16244  | *    |
| Malaysia         | 2002-2003  | Malaysian Adult Nutrition Survey                                                      | National                     | both                 | 18-59                                 | 18-59  | 3302                                    | 3395   | *    |
| Malaysia         | 2004       | Rampal et al., Public Health 122:11-8, 2008                                           | National                     | both                 | 18+                                   | 18+    | 6254                                    | 8550   | *    |
| Malaysia         | 2005       | STEPS                                                                                 | National                     | both                 | 25-64                                 | 25-64  | 1286                                    | 1286   | *    |
| Malaysia         | 2006       | National Health and Morbidity Survey (NHMS)                                           | National                     | both                 | 18+                                   | 18+    | 15025                                   | 17824  | *    |
| Malaysia         | 2008       | Metabolic Syndrome Study in Malaysia                                                  | National                     | both                 | 18+                                   | 18+    | 1522                                    | 2814   | *    |
| Malaysia         | 2011       | National Health and Morbidity Survey (NHMS)                                           | National                     | both                 | 18+                                   | 18+    | 8033                                    | 8780   | *    |
| Malaysia         | 2014       | Malaysian Adult Nutrition Survey                                                      | National                     | both                 | 18-59                                 | 18-59  | 1356                                    | 1533   | *    |
| Malaysia         | 2015       | National Health and Morbidity Survey (NHMS)                                           | National                     | both                 | 18+                                   | 18+    | 8916                                    | 9581   | *    |
| Maldives         | 2001       | Multiple Indicator Cluster Survey                                                     | National                     | both                 |                                       | 18-50  |                                         | 1145   | *    |
| Maldives         | 2004       | STEPS                                                                                 | Subnational                  | urban                | 25-64                                 | 25-64  | 933                                     | 1086   | *    |
| Maldives         | 2009       | DHS                                                                                   | National                     | both                 |                                       | 20-49  |                                         | 5139   | †    |
| Maldives         | 2011       | STEPS                                                                                 | Subnational                  | urban                | 18-64                                 | 18-64  | 588                                     | 1000   | †    |
| Mali             | 1995-1996  | DHS                                                                                   | National                     | both                 |                                       | 20-49  |                                         | 3789   | †    |
| Mali             | 1997       | Torheim et al., Eur J Clin Nutr 58(4):594-604, 2004                                   | Subnational                  | rural                | 18-44                                 | 18-44  | 237                                     | 337    | *    |
| Mali             | 1999       | Torheim et al., Public Health Nutr 8(4):387-94, 2005                                  | Subnational                  | rural                |                                       | 18-44  |                                         | 191    | *    |
| Mali             | 2001       | DHS                                                                                   | National                     | both                 |                                       | 18-49  |                                         | 9281   | †    |
| Mali             | 2006       | DHS                                                                                   | National                     | both                 |                                       | 18-49  |                                         | 10726  | †    |
| Mali             | 2007       | STEPS                                                                                 | Subnational                  | both                 | 18-64                                 | 18-64  | 931                                     | 1315   | †    |
| Mali             | 2012-2013  | DHS                                                                                   | National                     | both                 |                                       | 18-49  |                                         | 4156   | †    |
| Mali             | 2013       | Santé Nutritionnelle à Assise Communautaire dans la région de Kayes (SNACK)           | Subnational                  | rural                |                                       | 20-68  |                                         | 4595   | *    |
| Malta            | 1986       | INTERALT                                                                              | Community                    | rural                | 20-59                                 | 20-59  | 100                                     | 100    | †    |
| Marshall Islands | 2002       | STEPS                                                                                 | National                     | both                 | 18-64                                 | 18-64  | 686                                     | 1058   | †    |
| Mauritania       | 2000-2001  | DHS                                                                                   | National                     | both                 |                                       | 18-49  |                                         | 2635   | *    |
| Mauritania       | 2006       | STEPS                                                                                 | Community                    | urban                | 18-64                                 | 18-64  | 1065                                    | 1218   | †    |
| Mauritius        | 1987       | Mauritius non-communicable disease survey                                             | National                     | both                 | 25-74                                 | 25-74  | 2345                                    | 2652   | *    |
| Mauritius        | 1992       | Mauritius non-communicable disease survey                                             | National                     | both                 | 25-74                                 | 25-74  | 2985                                    | 3477   | *    |
| Mauritius        | 1998       | Mauritius non-communicable disease survey                                             | National                     | both                 | 25-74                                 | 25-74  | 2566                                    | 3248   | *    |
| Mauritius        | 2009       | Mauritius non-communicable disease survey                                             | National                     | both                 | 19+                                   | 19+    | 2860                                    | 3391   | *    |
| Mexico           | 1988-1989  | Encuesta Nacional de Nutrición                                                        | National                     | both                 |                                       | 18-49  |                                         | 12043  | *    |
| Mexico           | 1992-1993  | Encuesta Nacional de Enfermedades Crónicas                                            | National                     | urban                | 20-69                                 | 20-69  | 6040                                    | 8298   | *    |
| Mexico           | 1996       | Sanchez-Castillo et al., Eur J Clin Nutr 55(10):833-40, 2001                          | Community                    | rural                | 18+                                   | 18+    | 104                                     | 149    | *    |
| Mexico           | 1998-1999  | Encuesta Nacional de Nutrición                                                        | National                     | both                 |                                       | 18-49  |                                         | 13884  | *    |
| Mexico           | 1998-2004  | Mexico City Prospective Study                                                         | Community                    | urban                | 35-84                                 | 35-84  | 51768                                   | 105313 | *    |
| Mexico           | 1999-2000  | The Survey on Health, Well-Being, and Aging in Latin America and the Caribbean (SABE) | Community                    | urban                | 60+                                   | 60+    | 359                                     | 548    | 2†   |
| Mexico           | 2000       | Encuesta Nacional de Salud                                                            | National                     | both                 | 18+                                   | 18+    | 14692                                   | 30262  | *    |
| Mexico           | 2001       | The Mexican Health and Aging Study                                                    | National                     | both                 | 50+                                   | 50+    | 1030                                    | 1224   | †    |
| Mexico           | 2002       | Encuesta Nacional Sobre Niveles de vida de los Hogares                                | National                     | both                 | 18+                                   | 18+    | 7332                                    | 9086   | †    |
| Mexico           | 2003       | The Mexican Health and Aging Study                                                    | National                     | both                 | 50+                                   | 50+    | 893                                     | 1162   | †    |
| Mexico           | 2004-2005  | Cardiovascular Risk factors Multiple Evaluation in Latin America (CARMELA)            | Community                    | urban                | 25-64                                 | 25-64  | 833                                     | 894    | *    |
| Mexico           | 2005       | Encuesta Nacional Sobre Niveles de vida de los Hogares                                | National                     | both                 | 18+                                   | 18+    | 7551                                    | 9086   | †    |
| Mexico           | 2006       | Encuesta Nacional de Salud y Nutrición                                                | National                     | both                 | 18+                                   | 18+    | 14471                                   | 21429  | *    |
| Mexico           | 2006       | PREVENIMSS National Coverage Surveys                                                  | National                     | urban                | 20+                                   | 20+    | 8715                                    | 11315  | *    |
| Mexico           | 2009-2010  | SAGE                                                                                  | National                     | both                 | 50+                                   | 50+    | 796                                     | 1236   | †    |
| Mexico           | 2009-2012  | Encuesta Nacional Sobre Niveles de vida de los Hogares                                | National                     | both                 | 18+                                   | 18+    | 4393                                    | 4108   | †    |



| Country                          | Data years | Survey/study name/citation                                                                                              | Level of representative-ness | Rural, urban or both | Age range as used for global analysis |        | Sample size as used for global analysis |        | Note |
|----------------------------------|------------|-------------------------------------------------------------------------------------------------------------------------|------------------------------|----------------------|---------------------------------------|--------|-----------------------------------------|--------|------|
|                                  |            |                                                                                                                         |                              |                      | Male                                  | Female | Male                                    | Female |      |
| Mexico                           | 2010       | PREVENIMSS National Coverage Surveys                                                                                    | National                     | urban                | 20+                                   | 20+    | 6238                                    | 6003   | *    |
| Mexico                           | 2011-2012  | Encuesta Nacional de Salud y Nutrición                                                                                  | National                     | both                 | 18+                                   | 18+    | 17511                                   | 23418  | †    |
| Mexico                           | 2012       | The Mexican Health and Aging Study                                                                                      | National                     | both                 | 50+                                   | 50+    | 786                                     | 1106   | †    |
| Mexico                           | 2016       | Encuesta Nacional de Salud y Nutrición                                                                                  | National                     | both                 | 18+                                   | 18+    | 3073                                    | 5759   | †    |
| Micronesia (Federated States of) | 2002       | STEPS                                                                                                                   | Subnational                  | both                 | 25-64                                 | 25-64  | 591                                     | 893    | †    |
| Micronesia (Federated States of) | 2006       | STEPS                                                                                                                   | Subnational                  | both                 | 18-64                                 | 18-64  | 825                                     | 1420   | †    |
| Micronesia (Federated States of) | 2008       | STEPS                                                                                                                   | Subnational                  | both                 | 25-64                                 | 25-64  | 875                                     | 1266   | †    |
| Micronesia (Federated States of) | 2009       | STEPS, Kosrae                                                                                                           | Subnational                  | both                 | 18-64                                 | 18-64  | 208                                     | 413    | †    |
| Micronesia (Federated States of) | 2009       | STEPS, Yap                                                                                                              | Subnational                  | both                 | 18-64                                 | 18-64  | 391                                     | 518    | †    |
| Moldova                          | 2005       | DHS                                                                                                                     | National                     | both                 |                                       | 18-49  |                                         | 6268   | †    |
| Moldova                          | 2013       | STEPS                                                                                                                   | National                     | both                 | 18-69                                 | 18-69  | 1712                                    | 2777   | †    |
| Mongolia                         | 1999       | National Nutrition Survey                                                                                               | National                     | both                 | 35-65                                 | 35-65  | 907                                     | 1317   | *    |
| Mongolia                         | 2004       | National Nutrition Survey                                                                                               | National                     | both                 | 18-74                                 | 18-74  | 248                                     | 360    | *    |
| Mongolia                         | 2005       | STEPS                                                                                                                   | National                     | both                 | 18-64                                 | 18-64  | 1513                                    | 1590   | †    |
| Mongolia                         | 2009       | STEPS                                                                                                                   | National                     | both                 | 18-64                                 | 18-64  | 2079                                    | 2965   | †    |
| Mongolia                         | 2013       | STEPS                                                                                                                   | National                     | both                 | 18-64                                 | 18-64  | 2317                                    | 2807   | †    |
| Montenegro                       | 2016       | Anthropometric parameters as an indicator of obesity at adolescents in Montenegro                                       | National                     | both                 | 18                                    | 18     | 139                                     | 158    | *    |
| Morocco                          | 1992       | DHS                                                                                                                     | National                     | both                 |                                       | 20-49  |                                         | 2804   | †    |
| Morocco                          | 2000       | National Survey 2000                                                                                                    | National                     | both                 | 20+                                   | 20+    | 755                                     | 1047   | *    |
| Morocco                          | 2003-2004  | DHS                                                                                                                     | National                     | both                 |                                       | 18-49  |                                         | 13944  | †    |
| Morocco                          | 2017       | STEPS                                                                                                                   | National                     | both                 | 18-100                                | 18-100 | 1871                                    | 3390   | †    |
| Mozambique                       | 1997       | DHS                                                                                                                     | National                     | both                 |                                       | 20-49  |                                         | 2824   | †    |
| Mozambique                       | 2003       | DHS                                                                                                                     | National                     | both                 |                                       | 18-49  |                                         | 9241   | †    |
| Mozambique                       | 2005       | STEPS                                                                                                                   | National                     | both                 | 25-64                                 | 25-64  | 1276                                    | 1689   | †    |
| Mozambique                       | 2011       | DHS                                                                                                                     | National                     | both                 |                                       | 18-49  |                                         | 10396  | †    |
| Mozambique                       | 2014-2015  | STEPS                                                                                                                   | National                     | both                 | 18-64                                 | 18-64  | 1049                                    | 1565   | *    |
| Myanmar                          | 2003-2004  | STEPS                                                                                                                   | Subnational                  | both                 | 25-74                                 | 25-74  | 1990                                    | 2449   | *    |
| Myanmar                          | 2009       | STEPS                                                                                                                   | National                     | both                 | 18-64                                 | 18-64  | 2732                                    | 4277   | *    |
| Myanmar                          | 2011       | Underweight prevalence among young adults from rural areas, Salin Township, Magwe Region                                | Community                    | rural                | 18-35                                 | 18-35  | 127                                     | 207    | *    |
| Myanmar                          | 2014       | STEPS                                                                                                                   | National                     | both                 | 25-64                                 | 25-64  | 2947                                    | 5444   | *    |
| Myanmar                          | 2014       | STEPS, Yangon                                                                                                           | Subnational                  | both                 | 25-74                                 | 25-74  | 745                                     | 740    | *    |
| Myanmar                          | 2015-2016  | DHS                                                                                                                     | National                     | both                 |                                       | 18-49  |                                         | 11081  | †    |
| Namibia                          | 1992       | DHS                                                                                                                     | National                     | both                 |                                       | 20-49  |                                         | 2062   | †    |
| Namibia                          | 2005       | STEPS                                                                                                                   | National                     | both                 | 24-64                                 | 24-64  | 1390                                    | 1778   | †    |
| Namibia                          | 2006-2007  | DHS                                                                                                                     | National                     | both                 |                                       | 18-49  |                                         | 7698   | †    |
| Namibia                          | 2009       | Okambilimbili Survey                                                                                                    | Community                    | urban                | 18+                                   | 18+    | 752                                     | 949    | *    |
| Namibia                          | 2013       | DHS                                                                                                                     | National                     | both                 |                                       | 18-64  |                                         | 4632   | †    |
| Nauru                            | 1982       | Trends in the prevalence and incidence of non-insulin-dependent diabetes mellitus and impaired glucose tolerance        | National                     | both                 | 20+                                   | 20+    | 701                                     | 773    | 1*   |
| Nauru                            | 1987       | Trends in the prevalence and incidence of non-insulin-dependent diabetes mellitus and impaired glucose tolerance        | National                     | both                 | 20+                                   | 20+    | 555                                     | 667    | *    |
| Nauru                            | 1994       | Trends in the prevalence and incidence of non-insulin-dependent diabetes mellitus and impaired glucose tolerance        | National                     | both                 | 25+                                   | 25+    | 647                                     | 731    | *    |
| Nauru                            | 2004       | STEPS                                                                                                                   | National                     | both                 | 18-64                                 | 18-64  | 1011                                    | 1078   | †    |
| Nauru                            | 2006       | STEPS                                                                                                                   | National                     | both                 | 18-65                                 | 18-65  | 244                                     | 230    | *    |
| Nepal                            | 1996       | DHS                                                                                                                     | National                     | both                 |                                       | 20-49  |                                         | 3068   | †    |
| Nepal                            | 1997       | Ohno et al., Asia Pac J Public Health 18(3):20-9, 2006                                                                  | Community                    | rural                | 18-75                                 | 18-75  | 36                                      | 41     | *    |
| Nepal                            | 2001       | DHS                                                                                                                     | National                     | both                 |                                       | 20-49  |                                         | 7216   | †    |
| Nepal                            | 2003       | STEPS                                                                                                                   | Subnational                  | both                 | 25-64                                 | 25-64  | 1010                                    | 996    | *    |
| Nepal                            | 2005       | STEPS                                                                                                                   | Subnational                  | both                 | 18-64                                 | 18-64  | 3431                                    | 3790   | *    |
| Nepal                            | 2006       | DHS                                                                                                                     | National                     | both                 |                                       | 18-49  |                                         | 8677   | †    |
| Nepal                            | 2006-2011  | Early detection and management of Kidney disease, Hypertension, Diabetes and Cardiovascular disease (KHDC Nepal), Tara  | Community                    | rural                | 18+                                   | 18+    | 1175                                    | 2350   | *    |
| Nepal                            | 2006-2011  | Early detection and management of Kidney disease, Hypertension, Diabetes and Cardiovascular disease (KHDC Nepal), Dan   | Community                    | urban                | 18+                                   | 18+    | 1095                                    | 1576   | *    |
| Nepal                            | 2006-2011  | Early detection and management of Kidney disease, Hypertension, Diabetes and Cardiovascular disease (KHDC Nepal), Dha   | Community                    | urban                | 18+                                   | 18+    | 4130                                    | 6126   | *    |
| Nepal                            | 2007-2008  | STEPS                                                                                                                   | National                     | both                 | 18-64                                 | 18-64  | 1743                                    | 2210   | *    |
| Nepal                            | 2011       | DHS                                                                                                                     | National                     | both                 |                                       | 18-49  |                                         | 5076   | †    |
| Nepal                            | 2013       | STEPS                                                                                                                   | National                     | both                 | 18-69                                 | 18-69  | 1275                                    | 2703   | †    |
| Nepal                            | 2015       | Community based intervention for prevention and control of non-communicable diseases risk factors (CIPCON) baseline sur | Community                    | rural                | 18-69                                 | 18-69  | 546                                     | 772    | *    |
| Nepal                            | 2015       | Community based intervention for prevention and control of non-communicable diseases risk factors (CIPCON) baseline sur | Community                    | rural                | 18-69                                 | 18-69  | 538                                     | 703    | *    |
| Nepal                            | 2016       | DHS                                                                                                                     | National                     | both                 | 18-49                                 | 18-49  | 3445                                    | 5382   | †    |
| Netherlands                      | 1985       | INTERSALT                                                                                                               | Community                    | urban                | 20-59                                 | 20-59  | 100                                     | 99     | †    |
| Netherlands                      | 1985       | Zutphen Elderly Study                                                                                                   | Community                    | urban                | 64-85                                 |        | 886                                     |        | *    |

| Country     | Data years | Survey/study name/citation                                              | Level of representative-ness | Rural, urban or both | Age range as used for global analysis |        | Sample size as used for global analysis |        | Note |
|-------------|------------|-------------------------------------------------------------------------|------------------------------|----------------------|---------------------------------------|--------|-----------------------------------------|--------|------|
|             |            |                                                                         |                              |                      | Male                                  | Female | Male                                    | Female |      |
| Netherlands | 1989-1993  | The Rotterdam Study, first subcohort                                    | Community                    | urban                | 55+                                   | 55+    | 2807                                    | 4103   | *    |
| Netherlands | 1990       | Zutphen Elderly Study                                                   | Community                    | urban                | 69-90                                 |        | 552                                     |        | *    |
| Netherlands | 1992-1993  | The Longitudinal Aging Study Amsterdam (LASA)                           | Subnational                  | both                 | 55-85                                 | 55-85  | 1266                                    | 1308   | 4*   |
| Netherlands | 1993-1995  | The Rotterdam Study, first subcohort                                    | Community                    | urban                | 56+                                   | 56+    | 2214                                    | 3105   | *    |
| Netherlands | 1993-1997  | EPIC Bilthoven                                                          | Community                    | urban                | 20-59                                 | 20-59  | 9941                                    | 12021  | *    |
| Netherlands | 1993-1997  | EPIC Utrecht                                                            | Community                    | both                 | 49-70                                 | 49-70  |                                         | 17335  | *    |
| Netherlands | 1995-1996  | The Longitudinal Aging Study Amsterdam (LASA)                           | Subnational                  | both                 | 58-88                                 | 58-88  | 715                                     | 765    | 4*   |
| Netherlands | 1997-1999  | The Rotterdam Study, first subcohort                                    | Community                    | urban                | 61+                                   | 61+    | 1718                                    | 2361   | *    |
| Netherlands | 1998-1999  | The Longitudinal Aging Study Amsterdam (LASA)                           | Subnational                  | both                 | 61-91                                 | 61-91  | 604                                     | 742    | 4*   |
| Netherlands | 1998-2001  | Regenboog Project                                                       | National                     | both                 | 18-89                                 | 18-89  | 2581                                    | 2490   | *    |
| Netherlands | 2000-2001  | The Rotterdam Study, second subcohort                                   | Community                    | urban                | 55+                                   | 55+    | 1210                                    | 1468   | *    |
| Netherlands | 2001-2002  | The Longitudinal Aging Study Amsterdam (LASA)                           | Subnational                  | both                 | 64-94                                 | 64-94  | 576                                     | 689    | 4*   |
| Netherlands | 2001-2003  | Surinamese in the Netherlands: Study on Ethnicity and Health (SUNSET)   | Community                    | urban                | 35-60                                 | 35-60  | 251                                     | 257    | *    |
| Netherlands | 2002-2003  | The Longitudinal Aging Study Amsterdam (LASA)                           | Subnational                  | both                 | 54-65                                 | 54-65  | 431                                     | 482    | 4*   |
| Netherlands | 2002-2004  | The Rotterdam Study, first subcohort                                    | Community                    | urban                | 64+                                   | 64+    | 1206                                    | 1708   | *    |
| Netherlands | 2003-2007  | Doetinchem Cohort Study (4th measurement)                               | Subnational                  | urban                | 36-74                                 | 36-74  | 2125                                    | 2352   | *    |
| Netherlands | 2004-2005  | The Rotterdam Study, second subcohort                                   | Community                    | urban                | 58+                                   | 58+    | 964                                     | 1244   | *    |
| Netherlands | 2005-2006  | The Longitudinal Aging Study Amsterdam (LASA)                           | Subnational                  | both                 | 57-97                                 | 57-97  | 788                                     | 958    | 4*   |
| Netherlands | 2006-2008  | The Rotterdam Study, third subcohort                                    | Community                    | urban                | 45+                                   | 45+    | 1547                                    | 2029   | *    |
| Netherlands | 2008-2009  | The Longitudinal Aging Study Amsterdam (LASA)                           | Subnational                  | both                 | 60-100                                | 60-100 | 641                                     | 788    | 4*   |
| Netherlands | 2009-2010  | Measuring the Netherlands (NL de Maat)                                  | Subnational                  | both                 | 30-70                                 | 30-70  | 1781                                    | 2014   | *    |
| Netherlands | 2009-2011  | The Rotterdam Study, first subcohort                                    | Community                    | urban                | 72+                                   | 72+    | 690                                     | 1006   | *    |
| Netherlands | 2011-2012  | The Rotterdam Study, second subcohort                                   | Community                    | urban                | 65+                                   | 65+    | 735                                     | 934    | *    |
| Netherlands | 2011-2012  | The Longitudinal Aging Study Amsterdam (LASA)                           | Subnational                  | both                 | 63-104                                | 63-104 | 529                                     | 652    | 4*   |
| Netherlands | 2011-2015  | Healthy Life in an Urban Setting (HELIUS)                               | Community                    | urban                | 18-71                                 | 18-71  | 2088                                    | 2473   | *    |
| Netherlands | 2012-2014  | The Rotterdam Study, third subcohort                                    | Community                    | urban                | 52+                                   | 52+    | 1256                                    | 1639   | *    |
| New Zealand | 1989       | The Life in New Zealand Survey                                          | National                     | both                 | 18+                                   | 18+    | 1345                                    | 1485   | *    |
| New Zealand | 1990-1993  | Williams, N Z Med J 113(1114):308-11, 2000                              | Community                    | both                 | 18-21                                 | 18-21  | 932                                     | 859    | *    |
| New Zealand | 1993-1994  | MONICA, Auckland                                                        | Community                    | urban                | 35-64                                 | 35-64  | 723                                     | 674    | †    |
| New Zealand | 1996-1997  | National Nutrition Survey                                               | National                     | both                 | 18+                                   | 18+    | 1777                                    | 2423   | *    |
| New Zealand | 2002-2003  | New Zealand Health Survey                                               | National                     | both                 | 18+                                   | 18+    | 4438                                    | 6550   | *    |
| New Zealand | 2006-2007  | New Zealand Health Survey                                               | National                     | both                 | 18+                                   | 18+    | 4864                                    | 6271   | *    |
| New Zealand | 2008-2009  | New Zealand Adult Nutrition Survey                                      | National                     | both                 | 18+                                   | 18+    | 1754                                    | 2215   | *    |
| New Zealand | 2011-2012  | New Zealand Health Survey                                               | National                     | both                 | 18+                                   | 18+    | 4396                                    | 5948   | *    |
| New Zealand | 2012-2013  | New Zealand Health Survey                                               | National                     | both                 | 18+                                   | 18+    | 4967                                    | 6602   | *    |
| New Zealand | 2013-2014  | New Zealand Health Survey                                               | National                     | both                 | 18+                                   | 18+    | 5396                                    | 6807   | *    |
| New Zealand | 2014-2015  | New Zealand Health Survey                                               | National                     | both                 | 18+                                   | 18+    | 5486                                    | 6826   | *    |
| New Zealand | 2015-2016  | New Zealand Health Survey                                               | National                     | both                 | 18+                                   | 18+    | 5538                                    | 6932   | *    |
| Nicaragua   | 1997-1998  | DHS                                                                     | National                     | both                 |                                       | 18-49  |                                         | 10320  | †    |
| Nicaragua   | 2001       | DHS                                                                     | National                     | both                 |                                       | 18-49  |                                         | 10195  | †    |
| Nicaragua   | 2003-2004  | CAMDI                                                                   | Community                    | urban                | 20+                                   | 20+    | 773                                     | 916    | *    |
| Nicaragua   | 2003-2005  | Sistema Integrado de Vigilancia de Intervenciones Nutricionales (SIVIN) | National                     | both                 |                                       | 18-50  |                                         | 1115   | *    |
| Nicaragua   | 2006-2007  | Encuesta Nicaraguense de Demografia y Salud                             | National                     | both                 |                                       | 18-49  |                                         | 11765  | *    |
| Nicaragua   | 2011-2012  | Encuesta Nicaraguense de Demografia y Salud                             | National                     | both                 |                                       | 18-49  |                                         | 12790  | *    |
| Niger       | 1992       | DHS                                                                     | National                     | both                 |                                       | 20-49  |                                         | 2993   | †    |
| Niger       | 1998       | DHS                                                                     | National                     | both                 |                                       | 20-49  |                                         | 2958   | †    |
| Niger       | 2006       | DHS                                                                     | National                     | both                 |                                       | 18-49  |                                         | 3590   | †    |
| Niger       | 2007       | STEPS                                                                   | National                     | both                 | 18-64                                 | 18-64  | 1356                                    | 1131   | †    |
| Niger       | 2012       | DHS                                                                     | National                     | both                 |                                       | 18-49  |                                         | 3935   | †    |
| Nigeria     | 1990       | Non-communicable Diseases National Survey                               | National                     | both                 | 18+                                   | 18+    | 5236                                    | 5327   | *    |
| Nigeria     | 1991-1994  | Cooper et al., Am J Public Health 87(2):160-68, 1997                    | Community                    | both                 | 20-100                                | 20-100 | 910                                     | 1080   | *    |
| Nigeria     | 1999       | DHS                                                                     | National                     | both                 |                                       | 20-49  |                                         | 2004   | †    |
| Nigeria     | 1999-2009  | Prostate cancer dietary risk factors study                              | Subnational                  | both                 | 35+                                   |        | 626                                     |        | *    |
| Nigeria     | 2003       | DHS                                                                     | National                     | both                 |                                       | 18-49  |                                         | 5664   | †    |
| Nigeria     | 2006       | Senbanjo et al., West Afr J Med 30(6):425-31, 2011                      | Community                    | urban                | 18-19                                 | 18-19  | 10                                      | 12     | *    |
| Nigeria     | 2007       | Ibadan Study of Ageing                                                  | Subnational                  | both                 | 60+                                   | 60+    | 642                                     | 914    | *    |
| Nigeria     | 2008       | DHS                                                                     | National                     | both                 |                                       | 18-49  |                                         | 25418  | †    |
| Nigeria     | 2008       | Ibadan Study of Ageing                                                  | Subnational                  | both                 | 61+                                   | 61+    | 453                                     | 656    | *    |
| Nigeria     | 2009       | Ibadan Study of Ageing                                                  | Subnational                  | both                 | 62+                                   | 62+    | 420                                     | 619    | *    |

| Country                        | Data years | Survey/study name/citation                                                                                                  | Level of representative-ness | Rural, urban or both | Age range as used for global analysis |        | Sample size as used for global analysis |        | Note |
|--------------------------------|------------|-----------------------------------------------------------------------------------------------------------------------------|------------------------------|----------------------|---------------------------------------|--------|-----------------------------------------|--------|------|
|                                |            |                                                                                                                             |                              |                      | Male                                  | Female | Male                                    | Female |      |
| Nigeria                        | 2009       | Community Health Plan - Kwara Central Survey                                                                                | Community                    | rural                | 18+                                   | 18+    | 1247                                    | 1418   | *    |
| Nigeria                        | 2011       | Community Health Plan - Kwara Central Survey                                                                                | Community                    | rural                | 18+                                   | 18+    | 396                                     | 494    | *    |
| Nigeria                        | 2013       | DHS                                                                                                                         | National                     | both                 |                                       | 18-49  |                                         | 29348  | †    |
| Nigeria                        | 2013       | Community Health Plan - Kwara Central Survey                                                                                | Community                    | rural                | 18+                                   | 18+    | 358                                     | 421    | *    |
| Niue                           | 2011       | STEPS                                                                                                                       | National                     | both                 | 18-100                                | 18-100 | 376                                     | 454    | †    |
| Norway                         | 1984-1986  | HUNT1 Study                                                                                                                 | Subnational                  | rural                | 20+                                   | 20+    | 36517                                   | 37811  | *    |
| Norway                         | 1986-1987  | The Tromsø Study: Tromsø 3                                                                                                  | Community                    | both                 | 20-61                                 | 20-56  | 10295                                   | 9710   | *    |
| Norway                         | 1994-1995  | The Tromsø Study: Tromsø 4                                                                                                  | Community                    | both                 | 25+                                   | 25+    | 12516                                   | 13539  | *    |
| Norway                         | 1995-1997  | HUNT2 study                                                                                                                 | Subnational                  | rural                | 20+                                   | 20+    | 30285                                   | 33599  | *    |
| Norway                         | 1995-1997  | Young-HUNT1 Study                                                                                                           | Subnational                  | rural                | 18-21                                 | 18-21  | 652                                     | 703    | *    |
| Norway                         | 1997-1999  | The Hordaland Health Study (HUSK)                                                                                           | Community                    | urban                | 70-74                                 | 70-74  | 1465                                    | 1839   | *    |
| Norway                         | 1997-1999  | The Hordaland Health Study (HUSK)                                                                                           | Subnational                  | both                 | 40-47                                 | 40-47  | 10180                                   | 11928  | *    |
| Norway                         | 2000-2001  | Young-HUNT2 Study                                                                                                           | Subnational                  | rural                | 18-21                                 | 18-21  | 413                                     | 543    | *    |
| Norway                         | 2000-2003  | the Oslo cohort (HUBRO), the Oppland and Hedmark cohort (OPPHED), and the Troms and Finnmark cohort (TROFINN )              | Subnational                  | both                 | 30-76                                 | 30-76  | 16567                                   | 19926  | *    |
| Norway                         | 2001-2002  | The Tromsø Study: Tromsø 5, Tromsø Study Panel                                                                              | Community                    | both                 | 30-89                                 | 30-89  | 2523                                    | 3579   | *    |
| Norway                         | 2006-2008  | HUNT3 Study                                                                                                                 | Subnational                  | rural                | 20+                                   | 20+    | 22860                                   | 27553  | *    |
| Norway                         | 2006-2008  | Young-HUNT3 Study                                                                                                           | Subnational                  | rural                | 18-21                                 | 18-21  | 503                                     | 592    | *    |
| Norway                         | 2007-2008  | The Tromsø Study: Tromsø 6                                                                                                  | Community                    | both                 | 30-87                                 | 30-87  | 6048                                    | 6889   | *    |
| Occupied Palestinian Territory | 1996       | Stene et al., Eur J Clin Nutr 55(9):805-11, 2001                                                                            | Community                    | rural                | 30-65                                 | 30-65  | 208                                     | 269    | *    |
| Occupied Palestinian Territory | 1996-1998  | Rural Kobar and urban Old Ramallah                                                                                          | Community                    | both                 | 18-64                                 | 18-64  | 388                                     | 900    | *    |
| Occupied Palestinian Territory | 1999-2000  | The First National Health and Nutrition Survey                                                                              | National                     | both                 | 18-64                                 | 18-64  | 1319                                    | 1272   | *    |
| Occupied Palestinian Territory | 2010       | STEPS                                                                                                                       | National                     | both                 | 18-64                                 | 18-64  | 2324                                    | 3830   | †    |
| Oman                           | 1991       | Oman National Health Survey                                                                                                 | National                     | both                 | 20+                                   | 20+    | 2128                                    | 2958   | *    |
| Oman                           | 2000       | Oman National Health Survey                                                                                                 | National                     | both                 | 20+                                   | 20+    | 3069                                    | 3331   | *    |
| Oman                           | 2001       | Al-Lawati et al., Diabetes Care 26(6):1781-85, 2003                                                                         | Community                    | urban                | 20+                                   | 20+    | 755                                     | 756    | *    |
| Oman                           | 2006       | STEPS                                                                                                                       | Community                    | urban                | 20-59                                 | 20-59  | 540                                     | 732    | *    |
| Oman                           | 2008       | Gulf Cooperation Council World Health Survey                                                                                | National                     | both                 | 18+                                   | 18+    | 2389                                    | 2112   | *    |
| Pakistan                       | 1990-1994  | MHS                                                                                                                         | Community                    | urban                | 18+                                   | 18+    | 432                                     | 478    | *    |
| Pakistan                       | 1990-1994  | National Health Survey Of Pakistan 1990-1994                                                                                | National                     | both                 | 18+                                   | 18+    | 3789                                    | 4346   | *    |
| Pakistan                       | 1999       | Shah et al., Trop Med Int Health 9(4):526-32, 2004                                                                          | Community                    | both                 | 18+                                   | 18+    | 1391                                    | 2754   | *    |
| Pakistan                       | 2004-2005  | COBRA-1                                                                                                                     | Community                    | urban                | 40+                                   | 40+    | 1500                                    | 1635   | *    |
| Pakistan                       | 2005       | STEPS                                                                                                                       | National                     | both                 | 25-65                                 | 25-65  | 787                                     | 1071   | *    |
| Pakistan                       | 2011       | National Nutrition Survey                                                                                                   | National                     | both                 | 18-49                                 | 18-49  | 7312                                    | 30383  | *    |
| Pakistan                       | 2012-2013  | DHS                                                                                                                         | National                     | both                 |                                       | 20-49  |                                         | 3968   | †    |
| Pakistan                       | 2014       | STEPS                                                                                                                       | Subnational                  | both                 | 18-69                                 | 18-69  | 2964                                    | 3674   | †    |
| Palau                          | 2011-2013  | STEPS                                                                                                                       | National                     | both                 | 25-64                                 | 25-64  | 1031                                    | 1124   | †    |
| Panama                         | 2003       | Second Living Standards Survey                                                                                              | National                     | both                 | 18-75                                 | 18-75  | 6844                                    | 7100   | *    |
| Panama                         | 2010-2011  | Prevalencia de factores de riesgo asociados a enfermedad cardiovascular 2010-2011                                           | Subnational                  | both                 | 18+                                   | 18+    | 1067                                    | 2469   | *    |
| Papua New Guinea               | 1985-1986  | INTERSALT                                                                                                                   | Community                    | rural                | 20-59                                 | 20-59  | 88                                      | 74     | †    |
| Papua New Guinea               | 2007       | STEPS                                                                                                                       | National                     | both                 | 18-64                                 | 18-64  | 1281                                    | 1317   | †    |
| Paraguay                       | 2011       | Primera Encuesta Nacional de Factores de Riesgo de Enfermedades No Transmisibles en Poblacion General                       | National                     | both                 | 18-75                                 | 18-75  | 877                                     | 1510   | *    |
| Peru                           | 1991-1992  | DHS                                                                                                                         | National                     | both                 |                                       | 20-49  |                                         | 4887   | †    |
| Peru                           | 1996       | DHS                                                                                                                         | National                     | both                 |                                       | 20-49  |                                         | 10125  | †    |
| Peru                           | 2000       | DHS                                                                                                                         | National                     | both                 |                                       | 18-49  |                                         | 22078  | †    |
| Peru                           | 2004-2005  | Cardiovascular Risk factors Multiple Evaluation in Latin America (CARMELA)                                                  | Community                    | urban                | 25-64                                 | 25-64  | 769                                     | 876    | *    |
| Peru                           | 2004-2005  | Encuesta Nacional de Indicadores Nutricionales, Bioquímicos, Socioeconómicos y Culturales Relacionados con las Enfermedades | National                     | both                 | 20+                                   | 20+    | 2087                                    | 2095   | *    |
| Peru                           | 2004-2006  | DHS                                                                                                                         | National                     | both                 |                                       | 18-49  |                                         | 5030   | †    |
| Peru                           | 2005       | Prevalencia de Factores de Riesgo de Enfermedades No Transmisibles (FRENT) study, Huancayo                                  | Community                    | urban                | 18+                                   | 18+    | 198                                     | 530    | *    |
| Peru                           | 2006       | Prevalencia de Factores de Riesgo de Enfermedades No Transmisibles (FRENT) study, Lima                                      | Community                    | urban                | 18+                                   | 18+    | 616                                     | 1052   | *    |
| Peru                           | 2007-2008  | Monitoreo de Indicadores Nutricionales en la ENAHO 2007-2008                                                                | National                     | both                 | 18+                                   | 18+    | 9691                                    | 11038  | †    |
| Peru                           | 2007-2008  | DHS                                                                                                                         | National                     | both                 |                                       | 18-49  |                                         | 18357  | †    |
| Peru                           | 2007-2008  | PERU MIGRANT Study                                                                                                          | Community                    | both                 | 30+                                   | 30+    | 464                                     | 522    | *    |
| Peru                           | 2009       | DHS                                                                                                                         | National                     | both                 |                                       | 18-49  |                                         | 20118  | †    |
| Peru                           | 2009-2011  | Monitoreo de Indicadores Nutricionales en la ENAHO 2009-2010                                                                | National                     | both                 | 18+                                   | 18+    | 17629                                   | 21366  | †    |
| Peru                           | 2009-2012  | CRONICAS Cohort Study                                                                                                       | Subnational                  | both                 | 35+                                   | 35+    | 1557                                    | 1660   | *    |
| Peru                           | 2010       | DHS                                                                                                                         | National                     | both                 |                                       | 18-49  |                                         | 19529  | †    |
| Peru                           | 2010-2013  | CRONICAS Cohort Study                                                                                                       | Subnational                  | both                 | 35+                                   | 35+    | 1379                                    | 1468   | *    |
| Peru                           | 2011       | DHS                                                                                                                         | National                     | both                 |                                       | 18-49  |                                         | 19429  | †    |
| Peru                           | 2011-2012  | Monitoreo de Indicadores Nutricionales en la ENAHO 2011                                                                     | National                     | both                 | 18+                                   | 18+    | 4877                                    | 5872   | †    |

| Country     | Data years | Survey/study name/citation                                                                                                     | Level of representative-ness | Rural, urban or both | Age range as used for global analysis |        | Sample size as used for global analysis |        | Note |
|-------------|------------|--------------------------------------------------------------------------------------------------------------------------------|------------------------------|----------------------|---------------------------------------|--------|-----------------------------------------|--------|------|
|             |            |                                                                                                                                |                              |                      | Male                                  | Female | Male                                    | Female |      |
| Peru        | 2012       | DHS                                                                                                                            | National                     | both                 |                                       | 18-49  |                                         | 20859  | †    |
| Peru        | 2012-2013  | PERU MIGRANT Study                                                                                                             | Community                    | both                 | 35+                                   | 35+    | 339                                     | 427    | *    |
| Peru        | 2013       | DHS                                                                                                                            | National                     | both                 | 18+                                   | 18+    | 2731                                    | 21171  | †    |
| Peru        | 2013       | Clinical functional and sociofamilial profiles of the elderly from a community in a district of Lima, Peru                     | Community                    | urban                | 60+                                   | 60+    | 185                                     | 309    | *    |
| Peru        | 2013-2014  | CRONICAS Cohort Study                                                                                                          | Subnational                  | both                 | 36+                                   | 36+    | 1292                                    | 1361   | *    |
| Peru        | 2014       | DHS                                                                                                                            | National                     | both                 | 18+                                   | 18+    | 11795                                   | 25900  | †    |
| Peru        | 2014       | Launching a salt substitute to reduce blood pressure at the population level: a cluster randomized stepped wedge trial in Peru | Subnational                  | both                 | 18+                                   | 18+    | 1149                                    | 1166   | *    |
| Peru        | 2015       | DHS                                                                                                                            | National                     | both                 | 18+                                   | 18+    | 13773                                   | 35241  | †    |
| Peru        | 2015-2016  | PERU MIGRANT Study                                                                                                             | Community                    | both                 | 38+                                   | 38+    | 323                                     | 413    | *    |
| Peru        | 2016       | DHS                                                                                                                            | National                     | both                 | 18+                                   | 18+    | 13109                                   | 33055  | †    |
| Peru        | 2016-2017  | Sceneing of type II diabetes mellitus                                                                                          | Community                    | urban                | 30-70                                 | 30-70  | 798                                     | 809    | *    |
| Peru        | 2017       | DHS                                                                                                                            | National                     | both                 | 18+                                   | 18+    | 13467                                   | 34408  | †    |
| Philippines | 1984-1985  | Cebu Longitudinal Health and Nutrition Survey Baseline 16-Month Follow-up                                                      | Community                    | both                 |                                       | 18-50  |                                         | 2113   | †    |
| Philippines | 1984-1985  | Cebu Longitudinal Health and Nutrition Survey Baseline 18-Month Follow-up                                                      | Community                    | both                 |                                       | 18-50  |                                         | 2066   | †    |
| Philippines | 1985-1986  | Cebu Longitudinal Health and Nutrition Survey Baseline 20-Month Follow-up                                                      | Community                    | both                 |                                       | 18-50  |                                         | 2037   | †    |
| Philippines | 1985-1986  | Cebu Longitudinal Health and Nutrition Survey Baseline 22-Month Follow-up                                                      | Community                    | both                 |                                       | 18-50  |                                         | 2006   | †    |
| Philippines | 1985-1986  | Cebu Longitudinal Health and Nutrition Survey Baseline 24-Month Follow-up                                                      | Community                    | both                 |                                       | 18-50  |                                         | 2015   | †    |
| Philippines | 1988       | INCLIN                                                                                                                         | Community                    | rural                | 35-65                                 |        | 274                                     |        | *    |
| Philippines | 1991-1992  | Cebu Longitudinal Health and Nutrition Survey 1991 Mother Follow-up                                                            | Community                    | both                 |                                       | 22-55  |                                         | 2195   | †    |
| Philippines | 1993       | 4th National Nutrition Survey                                                                                                  | National                     | both                 | 20-70                                 | 20-70  | 4383                                    | 4754   | *    |
| Philippines | 1993       | National Safe Motherhood Survey                                                                                                | National                     | both                 |                                       | 18-49  |                                         | 7181   | *    |
| Philippines | 1994-1995  | Cebu Longitudinal Health and Nutrition Survey 1994-1995 Mother Follow-up                                                       | Community                    | both                 |                                       | 18-59  |                                         | 2552   | †    |
| Philippines | 1998       | 5th National Nutrition Survey Philippine                                                                                       | National                     | both                 | 20-60                                 | 20-60  | 1323                                    | 1340   | *    |
| Philippines | 1998-1999  | Cebu Longitudinal Health and Nutrition Survey 1998-1999 Mother Follow-up                                                       | Community                    | both                 |                                       | 18-59  |                                         | 1911   | †    |
| Philippines | 2002       | Cebu Longitudinal Health and Nutrition Survey 2002 Child Follow-up                                                             | Community                    | both                 | 18-19                                 | 18-19  | 1084                                    | 897    | †    |
| Philippines | 2002       | Cebu Longitudinal Health and Nutrition Survey 2002 Mother Follow-up                                                            | Community                    | both                 |                                       | 32-66  |                                         | 2080   | †    |
| Philippines | 2003       | 6th National Nutrition Survey                                                                                                  | National                     | both                 | 20+                                   | 20+    | 6311                                    | 6949   | *    |
| Philippines | 2005       | Cebu Longitudinal Health and Nutrition Survey 2005 Child Follow-up                                                             | Community                    | both                 | 20-22                                 | 20-22  | 1006                                    | 831    | †    |
| Philippines | 2005       | Cebu Longitudinal Health and Nutrition Survey 2005 Mother Follow-up                                                            | Community                    | both                 |                                       | 35-69  |                                         | 2001   | †    |
| Philippines | 2007       | Cebu Longitudinal Health and Nutrition Survey 2007 Child Follow-up                                                             | Community                    | both                 | 23-24                                 | 23-24  | 937                                     | 751    | †    |
| Philippines | 2007       | Cebu Longitudinal Health and Nutrition Survey 2007 Mother Follow-up                                                            | Community                    | both                 |                                       | 38-71  |                                         | 1925   | †    |
| Philippines | 2008       | 7th National Nutrition Survey                                                                                                  | National                     | both                 | 20+                                   | 20+    | 37687                                   | 38952  | *    |
| Philippines | 2009       | Cebu Longitudinal Health and Nutrition Survey 2009 Child Follow-up                                                             | Community                    | both                 | 24-26                                 | 24-26  | 864                                     | 718    | †    |
| Philippines | 2013-2014  | 8th National Nutrition Survey                                                                                                  | National                     | both                 | 18+                                   | 18+    | 35507                                   | 40834  | *    |
| Philippines | 2015       | 2015 Updating of Nutritional Status of Filipino Children and Other Population Groups                                           | National                     | both                 | 18+                                   | 18+    | 43151                                   | 48510  | *    |
| Poland      | 1986       | Poland Conscripts 10% Sample Cohort                                                                                            | National                     | both                 | 18-19                                 |        | 29380                                   |        | *    |
| Poland      | 1986       | INTERSALT, Krakow                                                                                                              | Community                    | urban                | 20-59                                 | 20-59  | 100                                     | 100    | †    |
| Poland      | 1986       | INTERSALT, Warsaw                                                                                                              | Community                    | urban                | 20-59                                 | 20-59  | 100                                     | 100    | †    |
| Poland      | 1987-1988  | MONICA, Tarnobrzeg Voivodship                                                                                                  | Community                    | rural                | 35-64                                 | 35-64  | 616                                     | 672    | †    |
| Poland      | 1988-1989  | MONICA, Warsaw                                                                                                                 | Community                    | urban                | 35-64                                 | 35-64  | 705                                     | 713    | †    |
| Poland      | 1989-1990  | Polish Program CINDI (CINDI Lodz 1989-1990)                                                                                    | Community                    | urban                | 25-64                                 | 25-64  | 831                                     | 957    | *    |
| Poland      | 1992-1993  | MONICA, Tarnobrzeg Voivodship                                                                                                  | Community                    | rural                | 35-64                                 | 35-64  | 618                                     | 692    | †    |
| Poland      | 1993       | MONICA, Warsaw                                                                                                                 | Community                    | urban                | 35-64                                 | 35-64  | 751                                     | 763    | †    |
| Poland      | 1995       | Poland Conscripts 10% Sample Cohort                                                                                            | National                     | both                 | 18-19                                 |        | 31007                                   |        | *    |
| Poland      | 1995-1996  | Polish Program CINDI (CINDI Lodz 1995)                                                                                         | Community                    | urban                | 18-64                                 | 18-64  | 964                                     | 1411   | *    |
| Poland      | 2000       | The health status, risk factors of chronic diseases and health behaviors of residents of Torun (CINDI Torun 2000)              | Community                    | urban                | 18-83                                 | 18-83  | 931                                     | 1017   | *    |
| Poland      | 2000       | Binkowska-Bury et al., Neuro Endocrinol Lett 34(8):814-20, 2013                                                                | Subnational                  | both                 | 19-20                                 |        | 3003                                    |        | *    |
| Poland      | 2000-2001  | Household Food Consumption and Anthropometric Survey                                                                           | National                     | both                 | 18+                                   | 18+    | 1287                                    | 1613   | *    |
| Poland      | 2001       | Binkowska-Bury et al., Neuro Endocrinol Lett 34(8):814-20, 2013                                                                | Subnational                  | both                 | 19-20                                 |        | 3420                                    |        | *    |
| Poland      | 2001       | Poland Conscripts 10% Sample Cohort                                                                                            | National                     | both                 | 18-19                                 |        | 31211                                   |        | *    |
| Poland      | 2001-2002  | The health status, risk factors of chronic diseases and health behaviors of residents of Lodz (CINDI Lodz 2001)                | Community                    | urban                | 18-64                                 | 18-64  | 1000                                    | 840    | *    |
| Poland      | 2002       | The health status, risk factors of chronic diseases and health behaviors of residents of Lodz - seniors (CINDI Lodz 2002)      | Community                    | urban                | 65+                                   | 65+    | 285                                     | 532    | *    |
| Poland      | 2002       | Binkowska-Bury et al., Neuro Endocrinol Lett 34(8):814-20, 2013                                                                | Subnational                  | both                 | 19-20                                 |        | 3544                                    |        | *    |
| Poland      | 2002       | NATPOL                                                                                                                         | National                     | both                 | 18+                                   | 18+    | 1018                                    | 1301   | *    |
| Poland      | 2002-2005  | Health, Alcohol and Psychosocial factors In Eastern Europe (HAPIEE)                                                            | Community                    | urban                | 45-69                                 | 45-69  | 4454                                    | 4720   | *    |
| Poland      | 2003       | Binkowska-Bury et al., Neuro Endocrinol Lett 34(8):814-20, 2013                                                                | Subnational                  | both                 | 19-20                                 |        | 3633                                    |        | *    |
| Poland      | 2003       | The European Male Ageing Study                                                                                                 | Community                    | both                 | 40+                                   |        | 406                                     |        | *    |
| Poland      | 2003-2005  | National Multicenter Health Survey in Poland. Project WOBASZ                                                                   | National                     | both                 | 20-74                                 | 20-74  | 6245                                    | 6910   | *    |
| Poland      | 2003-2013  | Mogielica Human Ecology Study                                                                                                  | Community                    | rural                | 21+                                   | 21+    | 353                                     | 896    | *    |

| Country            | Data years | Survey/study name/citation                                                                                                                   | Level of representative-ness | Rural, urban or both | Age range as used for global analysis |        | Sample size as used for global analysis |        | Note |
|--------------------|------------|----------------------------------------------------------------------------------------------------------------------------------------------|------------------------------|----------------------|---------------------------------------|--------|-----------------------------------------|--------|------|
|                    |            |                                                                                                                                              |                              |                      | Male                                  | Female | Male                                    | Female |      |
| Poland             | 2004       | Binkowska-Bury et al., Neuro Endocrinol Lett 34(8):814-20, 2013                                                                              | Subnational                  | both                 | 19-20                                 |        | 3538                                    |        | *    |
| Poland             | 2004       | LIPIDOGram2004 Study - National epidemiological study of lipid disorders and selected risk factors of cardiovascular disease                 | National                     | both                 | 30+                                   | 30+    | 6673                                    | 9920   | *    |
| Poland             | 2005       | Binkowska-Bury et al., Neuro Endocrinol Lett 34(8):814-20, 2013                                                                              | Subnational                  | both                 | 19-20                                 |        | 3308                                    |        | *    |
| Poland             | 2006       | The health, risk factors for chronic diseases, attitudes and behaviors of health residents of Torun (CINDI Torun 2006)                       | Community                    | urban                | 18-65                                 | 18-65  | 749                                     | 1115   | *    |
| Poland             | 2006       | Binkowska-Bury et al., Neuro Endocrinol Lett 34(8):814-20, 2013                                                                              | Subnational                  | both                 | 19-20                                 |        | 3701                                    |        | *    |
| Poland             | 2006       | LIPIDOGram2006 Study - National epidemiological study of lipid disorders and selected risk factors of cardiovascular disease                 | National                     | both                 | 32+                                   | 32+    | 6441                                    | 10640  | *    |
| Poland             | 2006-2007  | National Multicenter Health Survey in Poland. Project WOBASZ Senior                                                                          | National                     | both                 | 75+                                   | 75+    | 541                                     | 533    | *    |
| Poland             | 2007       | Binkowska-Bury et al., Neuro Endocrinol Lett 34(8):814-20, 2013                                                                              | Subnational                  | both                 | 19-20                                 |        | 3612                                    |        | *    |
| Poland             | 2007-2009  | Elaboration of the reference range of arterial blood pressure for the population of children and adolescents in Poland - PL008               | National                     | both                 | 18                                    | 18     | 440                                     | 597    | *    |
| Poland             | 2007-2011  | Medical, psychological and socioeconomic aspects of aging in Poland                                                                          | National                     | both                 | 55+                                   | 55+    | 2750                                    | 2582   | *    |
| Poland             | 2008       | Binkowska-Bury et al., Neuro Endocrinol Lett 34(8):814-20, 2013                                                                              | Subnational                  | both                 | 19-20                                 |        | 3435                                    |        | *    |
| Poland             | 2008       | The European Male Ageing Study                                                                                                               | Community                    | both                 | 40+                                   |        | 310                                     |        | *    |
| Poland             | 2009       | Binkowska-Bury et al., Neuro Endocrinol Lett 34(8):814-20, 2013                                                                              | Subnational                  | both                 | 19-20                                 |        | 3405                                    |        | *    |
| Poland             | 2010       | Binkowska-Bury et al., Neuro Endocrinol Lett 34(8):814-20, 2013                                                                              | Subnational                  | both                 | 19-20                                 |        | 3317                                    |        | *    |
| Poland             | 2011       | NATPOL                                                                                                                                       | National                     | both                 | 18-79                                 | 18-79  | 1158                                    | 1235   | *    |
| Poland             | 2013-2014  | National Multicenter Health Survey in Poland. Project WOBASZ II                                                                              | National                     | both                 | 20+                                   | 20+    | 2626                                    | 3198   | *    |
| Poland             | 2015-2016  | LIPIDOGram2015 & LIPIDOGEn2015 Study - National epidemiological study of lipid disorders and selected risk factors of cardiovascular disease | National                     | both                 | 18+                                   | 18+    | 5034                                    | 8690   | *    |
| Portugal           | 1985       | Body Mass Index of Portuguese Conscripts                                                                                                     | National                     | both                 | 18-20                                 |        | 29151                                   |        | *    |
| Portugal           | 1986       | Body Mass Index of Portuguese Conscripts                                                                                                     | National                     | both                 | 18-20                                 |        | 69318                                   |        | *    |
| Portugal           | 1986       | INTERSALT                                                                                                                                    | Community                    | rural                | 20-59                                 | 20-59  | 99                                      | 99     | †    |
| Portugal           | 1987       | Body Mass Index of Portuguese Conscripts                                                                                                     | National                     | both                 | 18-20                                 |        | 66930                                   |        | *    |
| Portugal           | 1988       | Body Mass Index of Portuguese Conscripts                                                                                                     | National                     | both                 | 18-20                                 |        | 66627                                   |        | *    |
| Portugal           | 1989       | Body Mass Index of Portuguese Conscripts                                                                                                     | National                     | both                 | 18-20                                 |        | 67703                                   |        | *    |
| Portugal           | 1990       | Body Mass Index of Portuguese Conscripts                                                                                                     | National                     | both                 | 18-20                                 |        | 42572                                   |        | *    |
| Portugal           | 1991       | Body Mass Index of Portuguese Conscripts                                                                                                     | National                     | both                 | 18-20                                 |        | 16697                                   |        | *    |
| Portugal           | 1992       | Body Mass Index of Portuguese Conscripts                                                                                                     | National                     | both                 | 18-20                                 |        | 51388                                   |        | *    |
| Portugal           | 1993       | Body Mass Index of Portuguese Conscripts                                                                                                     | National                     | both                 | 18-20                                 |        | 58904                                   |        | *    |
| Portugal           | 1994       | Body Mass Index of Portuguese Conscripts                                                                                                     | National                     | both                 | 18-20                                 |        | 54076                                   |        | *    |
| Portugal           | 1995       | Body Mass Index of Portuguese Conscripts                                                                                                     | National                     | both                 | 18-20                                 |        | 67509                                   |        | *    |
| Portugal           | 1996       | Body Mass Index of Portuguese Conscripts                                                                                                     | National                     | both                 | 18-21                                 |        | 104839                                  |        | *    |
| Portugal           | 1997       | Body Mass Index of Portuguese Conscripts                                                                                                     | National                     | both                 | 18-21                                 |        | 59770                                   |        | *    |
| Portugal           | 1998       | Body Mass Index of Portuguese Conscripts                                                                                                     | National                     | both                 | 18-21                                 |        | 40082                                   |        | *    |
| Portugal           | 1999       | Body Mass Index of Portuguese Conscripts                                                                                                     | National                     | both                 | 18-21                                 |        | 52572                                   |        | *    |
| Portugal           | 1999-2003  | EPIPorto Study                                                                                                                               | Community                    | urban                | 18+                                   | 18+    | 932                                     | 1507   | *    |
| Portugal           | 2000       | Body Mass Index of Portuguese Conscripts                                                                                                     | National                     | both                 | 18-21                                 |        | 51440                                   |        | *    |
| Portugal           | 2003-2005  | Estudo de Prevalência da Obesidade e Consumos Alimentares em Portugal                                                                        | National                     | both                 | 18-64                                 | 18-64  | 3144                                    | 3570   | *    |
| Portugal           | 2004       | Growth of adolescents in Gouveia                                                                                                             | Community                    | rural                | 18-19                                 | 18-19  | 2                                       | 5      | *    |
| Portugal           | 2007       | Growth of adolescents in Tondela                                                                                                             | Community                    | rural                |                                       | 18-19  |                                         | 2      | *    |
| Portugal           | 2007-2009  | Portuguese National Survey of Physical Activity and Physical Fitness                                                                         | National                     | both                 | 18+                                   | 18+    | 3233                                    | 5593   | *    |
| Portugal           | 2008       | Azorean Physical Activity and Health Study II                                                                                                | Subnational                  | both                 | 18                                    | 18     | 63                                      | 81     | *    |
| Portugal           | 2010-2012  | Exercise for Elderly                                                                                                                         | Community                    | urban                | 60-84                                 | 60-84  | 48                                      | 104    | *    |
| Portugal           | 2011-2013  | EPITeen - Epidemiological Health Investigation of Teenagers in Porto                                                                         | Community                    | urban                | 20-23                                 | 20-23  | 854                                     | 895    | *    |
| Portugal           | 2011-2014  | Longitudinal Analysis of Biomarkers and Environmental Determinants of Physical activity (LABMED Study)                                       | Subnational                  | urban                | 18                                    | 18     | 37                                      | 18     | *    |
| Puerto Rico        | 2002-2003  | Puerto Rican Elderly: Health Conditions                                                                                                      | National                     | both                 | 60+                                   | 60+    | 1914                                    | 2850   | 5*   |
| Puerto Rico        | 2005-2007  | Perez et al., Ethn Dis 18(4):434-41, 2008                                                                                                    | Community                    | urban                | 18-84                                 | 18-84  | 275                                     | 529    | *    |
| Puerto Rico        | 2006-2007  | Puerto Rican Elderly: Health Conditions                                                                                                      | National                     | both                 | 60+                                   | 60+    | 1056                                    | 1669   | 5*   |
| Puerto Rico        | 2010-2013  | HPV Infection in a Population-Based Sample of Puerto Rican Women                                                                             | Subnational                  | both                 |                                       | 18-64  |                                         | 557    | *    |
| Qatar              | 2006       | World Health Survey                                                                                                                          | National                     | both                 | 18+                                   | 18+    | 1859                                    | 2018   | *    |
| Qatar              | 2012       | STEPS                                                                                                                                        | National                     | both                 | 18-64                                 | 18-64  | 1034                                    | 1353   | †    |
| Romania            | 1986-1987  | MONICA, Bucharest                                                                                                                            | Community                    | urban                | 35-64                                 | 35-64  | 702                                     | 873    | †    |
| Romania            | 1997       | Somatometria                                                                                                                                 | National                     | both                 | 18-75                                 | 18-75  | 3142                                    | 4063   | *    |
| Romania            | 2009-2011  | Study on children in Dolj County, South Romania                                                                                              | Subnational                  | both                 | 18-21                                 | 18-21  | 87                                      | 38     | *    |
| Romania            | 2011-2012  | Study for the Evaluation of Prevalence of Hypertension and cArdiovascular Risk among the Adult Population of Romania - S                     | National                     | both                 | 18-80                                 | 18-80  | 1023                                    | 927    | *    |
| Romania            | 2014       | Timis County Study                                                                                                                           | Community                    | urban                | 18-19                                 | 18-19  | 8                                       | 5      | *    |
| Romania            | 2015-2016  | Study for the Evaluation of Prevalence of Hypertension and cArdiovascular Risk among the Adult Population of Romania - S                     | National                     | both                 | 18-80                                 | 18-80  | 936                                     | 1034   | *    |
| Russian Federation | 1984-1986  | MONICA, Moscow (control)                                                                                                                     | Community                    | urban                | 35-64                                 | 35-64  | 774                                     | 642    | †    |
| Russian Federation | 1984-1986  | MONICA, Moscow, Leninsky district                                                                                                            | Community                    | urban                | 35-64                                 | 35-64  | 553                                     | 622    | †    |
| Russian Federation | 1984-1986  | MONICA, Moscow, Cheremushkinsky district                                                                                                     | Community                    | urban                | 35-64                                 | 35-64  | 580                                     | 579    | †    |
| Russian Federation | 1985       | MONICA, Novosibirsk (intervention)                                                                                                           | Community                    | urban                | 25-64                                 | 25-64  | 797                                     | 818    | †    |

| Country               | Data years | Survey/study name/citation                                                  | Level of representative-ness | Rural, urban or both | Age range as used for global analysis |        | Sample size as used for global analysis |        | Note |
|-----------------------|------------|-----------------------------------------------------------------------------|------------------------------|----------------------|---------------------------------------|--------|-----------------------------------------|--------|------|
|                       |            |                                                                             |                              |                      | Male                                  | Female | Male                                    | Female |      |
| Russian Federation    | 1985-1986  | MONICA, Novosibirsk, Kirowsky district                                      | Community                    | urban                | 25-64                                 | 25-64  | 758                                     | 774    | †    |
| Russian Federation    | 1985-1986  | MONICA, Novosibirsk, Leninsky district                                      | Community                    | urban                | 25-64                                 | 25-64  | 624                                     | 624    | †    |
| Russian Federation    | 1986       | INTERALT                                                                    | Community                    | urban                | 20-59                                 | 20-59  | 97                                      | 97     | †    |
| Russian Federation    | 1988       | MONICA, Novosibirsk (intervention)                                          | Community                    | urban                | 25-64                                 | 25-64  | 837                                     | 852    | †    |
| Russian Federation    | 1988-1989  | MONICA, Moscow (control)                                                    | Community                    | urban                | 35-64                                 | 35-64  | 620                                     | 581    | †    |
| Russian Federation    | 1988-1989  | MONICA, Moscow, Leninsky district                                           | Community                    | urban                | 35-64                                 | 35-64  | 597                                     | 612    | †    |
| Russian Federation    | 1988-1989  | MONICA, Novosibirsk, Kirowsky district                                      | Community                    | urban                | 25-64                                 | 25-64  | 871                                     | 705    | †    |
| Russian Federation    | 1992       | CINDI                                                                       | Community                    | rural                | 25-64                                 | 25-64  | 377                                     | 453    | *    |
| Russian Federation    | 1992       | Russian Karelia Survey in Pitkaranta                                        | Community                    | both                 | 25-64                                 | 25-64  | 380                                     | 455    | *    |
| Russian Federation    | 1992-1993  | Russia Longitudinal Monitoring Survey-Higher School of Economics Round II   | National                     | both                 | 18+                                   | 18+    | 4361                                    | 5938   | †    |
| Russian Federation    | 1992-1995  | MONICA, Moscow (control)                                                    | Community                    | urban                | 35-64                                 | 35-64  | 556                                     | 527    | †    |
| Russian Federation    | 1992-1995  | MONICA, Moscow, Leninsky district                                           | Community                    | urban                | 35-64                                 | 35-64  | 538                                     | 858    | †    |
| Russian Federation    | 1993       | Russia Longitudinal Monitoring Survey-Higher School of Economics Round III  | National                     | both                 | 18+                                   | 18+    | 4519                                    | 6327   | †    |
| Russian Federation    | 1993-1994  | Russia Longitudinal Monitoring Survey-Higher School of Economics Round IV   | National                     | both                 | 18+                                   | 18+    | 4035                                    | 5668   | †    |
| Russian Federation    | 1994       | Russia Longitudinal Monitoring Survey-Higher School of Economics Round V    | National                     | both                 | 18+                                   | 18+    | 3574                                    | 4702   | †    |
| Russian Federation    | 1994-1995  | MONICA, Novosibirsk (intervention)                                          | Community                    | urban                | 25-64                                 | 25-64  | 820                                     | 860    | †    |
| Russian Federation    | 1995       | MONICA, Novosibirsk, Kirowsky district                                      | Community                    | urban                | 25-64                                 | 25-64  | 771                                     | 787    | †    |
| Russian Federation    | 1995       | Russia Longitudinal Monitoring Survey-Higher School of Economics Round VI   | National                     | both                 | 18+                                   | 18+    | 3358                                    | 4452   | †    |
| Russian Federation    | 1996       | Russia Longitudinal Monitoring Survey-Higher School of Economics Round VII  | National                     | both                 | 18+                                   | 18+    | 3317                                    | 4428   | †    |
| Russian Federation    | 1997       | Russian Karelia Survey in Pitkaranta                                        | Community                    | both                 | 25-64                                 | 25-64  | 309                                     | 440    | *    |
| Russian Federation    | 1998-1999  | Russia Longitudinal Monitoring Survey-Higher School of Economics Round VIII | National                     | both                 | 18+                                   | 18+    | 3433                                    | 4553   | †    |
| Russian Federation    | 2000       | Russia Longitudinal Monitoring Survey-Higher School of Economics Round IX   | National                     | both                 | 18+                                   | 18+    | 3521                                    | 4771   | †    |
| Russian Federation    | 2001       | Russia Longitudinal Monitoring Survey-Higher School of Economics Round X    | National                     | both                 | 18+                                   | 18+    | 3881                                    | 5387   | †    |
| Russian Federation    | 2002       | Russian Karelia Survey in Pitkaranta                                        | Community                    | both                 | 25-64                                 | 25-64  | 251                                     | 334    | *    |
| Russian Federation    | 2002       | Russia Longitudinal Monitoring Survey-Higher School of Economics Round XI   | National                     | both                 | 18+                                   | 18+    | 4070                                    | 5542   | †    |
| Russian Federation    | 2002-2005  | Health, Alcohol and Psychosocial factors In Eastern Europe (HAPIEE)         | Community                    | urban                | 45-69                                 | 45-69  | 4208                                    | 5040   | *    |
| Russian Federation    | 2003       | Russia Longitudinal Monitoring Survey-Higher School of Economics Round XII  | National                     | both                 | 18+                                   | 18+    | 4132                                    | 5631   | †    |
| Russian Federation    | 2004       | Russia Longitudinal Monitoring Survey-Higher School of Economics Round XIII | National                     | both                 | 18+                                   | 18+    | 4149                                    | 5645   | †    |
| Russian Federation    | 2005       | Russia Longitudinal Monitoring Survey-Higher School of Economics Round XIV  | National                     | both                 | 18+                                   | 18+    | 4025                                    | 5498   | †    |
| Russian Federation    | 2007       | Russian Karelia Survey in Pitkaranta                                        | Community                    | both                 | 25-64                                 | 25-64  | 176                                     | 276    | *    |
| Russian Federation    | 2007-2010  | SAGE                                                                        | National                     | both                 | 50+                                   | 50+    | 1254                                    | 2251   | †    |
| Russian Federation    | 2015-2017  | Ural Eye and Medical Study (UEMS)                                           | Subnational                  | both                 | 40+                                   | 40+    | 2580                                    | 3319   | *    |
| Rwanda                | 2000       | DHS                                                                         | National                     | both                 |                                       | 18-49  |                                         | 7589   | †    |
| Rwanda                | 2005       | DHS                                                                         | National                     | both                 |                                       | 18-49  |                                         | 4381   | †    |
| Rwanda                | 2010       | DHS                                                                         | National                     | both                 | 18-59                                 | 18-49  | 5536                                    | 5559   | †    |
| Rwanda                | 2012       | STEPS                                                                       | National                     | both                 | 18-64                                 | 18-64  | 2486                                    | 3997   | †    |
| Rwanda                | 2014-2015  | DHS                                                                         | National                     | both                 | 18-59                                 | 18-49  | 5550                                    | 5433   | †    |
| Saint Kitts and Nevis | 2007       | STEPS                                                                       | Subnational                  | both                 | 25-64                                 | 25-64  | 510                                     | 852    | †    |
| Saint Lucia           | 1991-1994  | Cooper et al., Am J Public Health 87(2):160-68, 1997                        | Community                    | urban                | 25-100                                | 25-100 | 491                                     | 593    | *    |
| Saint Lucia           | 2012       | STEPS                                                                       | National                     | both                 | 25-64                                 | 25-64  | 586                                     | 938    | †    |
| Samoa                 | 1991       | McGarvey, Pac Health Dialog 8(1):157-62, 2001                               | National                     | both                 | 25+                                   | 25+    | 346                                     | 381    | *    |
| Samoa                 | 1993       | McGarvey, Pac Health Dialog 8(1):157-62, 2001                               | National                     | both                 | 27+                                   | 27+    | 284                                     | 336    | *    |
| Samoa                 | 1995       | McGarvey, Pac Health Dialog 8(1):157-62, 2001                               | National                     | both                 | 29+                                   | 29+    | 152                                     | 157    | *    |
| Samoa                 | 2002       | STEPS                                                                       | National                     | both                 | 25-64                                 | 25-64  | 1181                                    | 1334   | †    |
| Samoa                 | 2010       | Samoaan Genome-Wide Association Study                                       | National                     | both                 | 24-65                                 | 24-65  | 1402                                    | 2061   | *    |
| Samoa                 | 2013       | STEPS                                                                       | National                     | both                 | 18-64                                 | 18-64  | 605                                     | 918    | †    |
| Sao Tome and Principe | 2008-2009  | DHS                                                                         | National                     | both                 | 18-59                                 | 18-49  | 1896                                    | 1961   | †    |
| Sao Tome and Principe | 2009       | STEPS                                                                       | National                     | both                 | 25-64                                 | 25-64  | 998                                     | 1286   | †    |
| Saudi Arabia          | 1985-1988  | National Nutrition Survey                                                   | National                     | both                 | 19-75                                 | 19-75  | 2311                                    | 3057   | *    |
| Saudi Arabia          | 1989-1994  | National Nutrition Survey                                                   | National                     | both                 | 18-40                                 | 18-40  | 2481                                    | 3294   | *    |
| Saudi Arabia          | 1990-1993  | National Epidemiological Household Survey                                   | National                     | both                 | 18-60                                 | 18-60  | 4882                                    | 4509   | *    |
| Saudi Arabia          | 1990-1993  | Saudi National Survey                                                       | National                     | both                 | 30-70                                 | 30-70  | 1612                                    | 1648   | *    |
| Saudi Arabia          | 1992-1995  | Saudi Health Information Survey                                             | National                     | both                 | 18-50                                 | 18-50  | 2812                                    | 5223   | *    |
| Saudi Arabia          | 1995       | National Household Survey                                                   | National                     | both                 | 20-70                                 | 20-70  | 7121                                    | 7074   | *    |
| Saudi Arabia          | 1995-2000  | National Epidemiological Health Survey                                      | National                     | both                 | 30-70                                 | 30-70  | 8215                                    | 9008   | *    |
| Saudi Arabia          | 2004-2005  | Al-Baghli et al., Saudi Med J 29(9):1319-25, 2008                           | Subnational                  | both                 | 30+                                   | 30+    | 97254                                   | 97254  | *    |
| Saudi Arabia          | 2005       | El Mouzan et al., Ann Saudi Med 30(3):203-8, 2010                           | National                     | both                 | 18                                    | 18     | 417                                     | 471    | *    |
| Saudi Arabia          | 2005       | STEPS                                                                       | National                     | both                 | 18-64                                 | 18-64  | 2245                                    | 2345   | *    |
| Saudi Arabia          | 2007       | Gulf Cooperation Council World Health Survey                                | National                     | both                 | 18+                                   | 18+    | 4854                                    | 3610   | *    |

| Country         | Data years | Survey/study name/citation                                                                            | Level of representative-ness | Rural, urban or both | Age range as used for global analysis |        | Sample size as used for global analysis |        | Note |
|-----------------|------------|-------------------------------------------------------------------------------------------------------|------------------------------|----------------------|---------------------------------------|--------|-----------------------------------------|--------|------|
|                 |            |                                                                                                       |                              |                      | Male                                  | Female | Male                                    | Female |      |
| Saudi Arabia    | 2009-2010  | Arab Teens Lifestyle Study (ATLS)                                                                     | Subnational                  | urban                | 18-19                                 | 18-19  | 349                                     | 244    | *    |
| Saudi Arabia    | 2011-2012  | Jeeluna Study- National Assessment of the Health Needs of Adolescents in Saudi Arabia                 | National                     | both                 | 18-19                                 | 18-19  | 1423                                    | 971    | *    |
| Saudi Arabia    | 2011-2013  | Jeddah City Study                                                                                     | Community                    | urban                | 18+                                   | 18+    | 565                                     | 683    | *    |
| Saudi Arabia    | 2013       | Saudi Health Information Survey                                                                       | National                     | both                 | 18+                                   | 18+    | 4694                                    | 4948   | *    |
| Senegal         | 1984       | Maire et al., Rev Epidemiol Sante Publique 40:252-58, 1992                                            | National                     | rural                |                                       | 18-45  |                                         | 1628   | 1*   |
| Senegal         | 1986       | Astagneau et al., J Hypertens 10(9):1095-101, 1992                                                    | Community                    | urban                | 18+                                   | 18+    | 651                                     | 707    | *    |
| Senegal         | 1986       | Maire et al., Rev Epidemiol Sante Publique 40:252-58, 1992                                            | Community                    | urban                |                                       | 18-45  |                                         | 616    | *    |
| Senegal         | 1992-1993  | DHS                                                                                                   | National                     | both                 |                                       | 20-49  |                                         | 2713   | †    |
| Senegal         | 2003       | Holdsworth et al., Int J Obes Relat Metab Disord 28(12):1561-68, 2004                                 | Community                    | urban                |                                       | 20-49  |                                         | 301    | *    |
| Senegal         | 2005       | DHS                                                                                                   | National                     | both                 |                                       | 18-49  |                                         | 3450   | †    |
| Senegal         | 2010-2011  | DHS                                                                                                   | National                     | both                 | 18-59                                 | 18-49  | 3943                                    | 4704   | †    |
| Serbia          | 1988-1989  | MONICA, Novi Sad                                                                                      | Community                    | urban                | 25-64                                 | 25-64  | 778                                     | 791    | †    |
| Serbia          | 1994-1995  | MONICA, Novi Sad                                                                                      | Community                    | urban                | 25-64                                 | 25-64  | 600                                     | 670    | †    |
| Serbia          | 2000       | Health Status, Health Needs and Utilization of Health Care of the Population of Serbia                | National                     | both                 | 18+                                   | 18+    | 4279                                    | 5375   | *    |
| Serbia          | 2006       | The 2006 National Health Survey for the Population of Serbia                                          | National                     | both                 | 18+                                   | 18+    | 6766                                    | 7445   | *    |
| Serbia          | 2013       | The National Health Survey of the Republic of Serbia, 2013                                            | National                     | both                 | 18+                                   | 18+    | 6262                                    | 7202   | *    |
| Serbia          | 2013-2014  | Stay Fit for Lifelong Health; the Prevalence of Lifestyle Health Conditions in Serbian Population     | National                     | urban                | 18-65                                 |        | 1366                                    |        | *    |
| Seychelles      | 1989       | Seychelles Heart Survey I                                                                             | National                     | both                 | 25-64                                 | 25-64  | 513                                     | 568    | *    |
| Seychelles      | 1994       | Seychelles Heart Survey II                                                                            | National                     | both                 | 25-64                                 | 25-64  | 497                                     | 557    | *    |
| Seychelles      | 2004       | Seychelles Heart Survey III                                                                           | National                     | both                 | 25-64                                 | 25-64  | 568                                     | 687    | *    |
| Seychelles      | 2013-2014  | Seychelles Heart Survey IV                                                                            | National                     | both                 | 25-64                                 | 25-64  | 531                                     | 699    | *    |
| Sierra Leone    | 2008       | DHS                                                                                                   | National                     | both                 |                                       | 18-49  |                                         | 2964   | †    |
| Sierra Leone    | 2009       | STEPS                                                                                                 | National                     | both                 | 25-64                                 | 25-64  | 2200                                    | 2319   | †    |
| Sierra Leone    | 2013       | DHS                                                                                                   | National                     | both                 | 18-59                                 | 18-49  | 6126                                    | 6407   | †    |
| Singapore       | 1982-1985  | Thyroid Heart Study                                                                                   | National                     | both                 | 18+                                   | 18+    | 1030                                    | 990    | 1*   |
| Singapore       | 1992       | National Health Survey 1992                                                                           | National                     | both                 | 18-64                                 | 18-64  | 1743                                    | 1704   | *    |
| Singapore       | 1993-1995  | NUH Heart Study                                                                                       | National                     | both                 | 26-89                                 | 26-89  | 498                                     | 484    | *    |
| Singapore       | 1998       | National Health Survey 1998                                                                           | National                     | both                 | 18-69                                 | 18-69  | 2284                                    | 2265   | *    |
| Singapore       | 2004       | National Health Survey 2004                                                                           | National                     | both                 | 18-74                                 | 18-74  | 2059                                    | 2095   | *    |
| Singapore       | 2004-2007  | Combined follow up of Singapore Cardiovascular Cohort study and Singapore Prospective study           | National                     | both                 | 24+                                   | 24+    | 2471                                    | 2686   | *    |
| Singapore       | 2009       | Social Isolation, Health and Lifestyles Survey (SIHLS) 2009                                           | National                     | both                 | 60+                                   | 60+    | 2038                                    | 2382   | *    |
| Singapore       | 2009-2011  | The Singapore Chinese Eye Study                                                                       | Community                    | both                 | 40-80                                 | 40-80  | 1652                                    | 1679   | *    |
| Singapore       | 2012-2013  | Singapore Health Study 2012                                                                           | National                     | both                 | 18-79                                 | 18-79  | 956                                     | 1026   | *    |
| Slovakia        | 1993       | Countrywide Integrated Noncommunicable Diseases Intervention (CINDI) Programme                        | National                     | both                 | 18-64                                 | 18-64  | 762                                     | 1217   | *    |
| Slovakia        | 1998       | Countrywide Integrated Noncommunicable Diseases Intervention (CINDI) Programme                        | National                     | both                 | 18-64                                 | 18-64  | 857                                     | 1046   | *    |
| Slovakia        | 2003       | Countrywide Integrated Noncommunicable Diseases Intervention (CINDI) Programme                        | National                     | both                 | 18-64                                 | 18-64  | 622                                     | 867    | *    |
| Slovakia        | 2008       | Countrywide Integrated Noncommunicable Diseases Intervention (CINDI) Programme                        | National                     | both                 | 18-64                                 | 18-64  | 391                                     | 561    | *    |
| Slovakia        | 2011-2012  | European Health Examination Survey                                                                    | National                     | both                 | 18-64                                 | 18-64  | 884                                     | 1080   | *    |
| Slovenia        | 1994       | Analysis of Children's Development in Slovenia (ACDSi)                                                | National                     | both                 | 18                                    | 18     | 110                                     | 116    | *    |
| Slovenia        | 2004       | Analysis of Children's Development in Slovenia (ACDSi)                                                | National                     | both                 | 18-19                                 | 18-19  | 229                                     | 172    | *    |
| Slovenia        | 2014       | Analysis of Children's Development in Slovenia (ACDSi)                                                | National                     | both                 | 18-19                                 | 18-19  | 143                                     | 126    | *    |
| Slovenia        | 2014       | the SLOFIT monitoring system                                                                          | National                     | both                 | 18-21                                 | 18-21  | 6460                                    | 6410   | *    |
| Solomon Islands | 2004       | A genetic-ecological study of the risk factors for lifestyle-related diseases in Oceanian populations | Community                    | both                 | 18-79                                 | 18-79  | 197                                     | 204    | *    |
| Solomon Islands | 2006       | STEPS                                                                                                 | Subnational                  | both                 | 18-64                                 | 18-64  | 990                                     | 1307   | †    |
| Solomon Islands | 2009-2010  | Furusawa et al., N Z Med J 124(1333):17-28, 2011                                                      | Subnational                  | both                 | 18+                                   | 18+    | 175                                     | 272    | *    |
| Solomon Islands | 2015       | STEPS                                                                                                 | National                     | both                 | 18-69                                 | 18-69  | 816                                     | 978    | †    |
| South Africa    | 1989       | Temple et al., Ethn Dis 11(3):431-7, 2001                                                             | Community                    | both                 | 18+                                   | 18+    | 457                                     | 614    | *    |
| South Africa    | 1990       | Steyn et al., East Afr Med J 75(1):35-40, 1998                                                        | Community                    | urban                | 18-64                                 | 18-64  | 292                                     | 373    | *    |
| South Africa    | 1996       | Temple et al., Ethn Dis 11(3):431-7, 2001                                                             | Community                    | both                 | 18+                                   | 18+    | 302                                     | 406    | *    |
| South Africa    | 1998       | DHS                                                                                                   | National                     | both                 | 18+                                   | 18+    | 4985                                    | 7105   | †    |
| South Africa    | 2002       | The 1st South African National Youth Risk Behaviour Survey                                            | National                     | both                 | 18                                    | 18     | 475                                     | 420    | *    |
| South Africa    | 2002-2003  | SASPI                                                                                                 | Community                    | rural                | 35+                                   | 35+    | 80                                      | 275    | *    |
| South Africa    | 2003       | DHS                                                                                                   | National                     | both                 | 18+                                   | 18+    | 2825                                    | 4121   | †    |
| South Africa    | 2003-2004  | Africa Centre Biomeasure Survey                                                                       | Community                    | rural                | 25-49                                 | 25-49  | 778                                     | 1693   | *    |
| South Africa    | 2004-2006  | Li et al., Curationis 30(4):79-87, 2007                                                               | Community                    | both                 | 18-40                                 | 18-40  | 334                                     | 270    | *    |
| South Africa    | 2007-2008  | SAGE                                                                                                  | National                     | both                 | 50+                                   | 50+    | 1541                                    | 2058   | †    |
| South Africa    | 2008       | National Income Dynamics Study Wave I                                                                 | National                     | both                 | 18+                                   | 18+    | 4811                                    | 7322   | †    |
| South Africa    | 2008       | The 2nd South African National Youth Risk Behaviour Survey                                            | National                     | both                 | 18                                    | 18     | 526                                     | 431    | *    |
| South Africa    | 2008-2009  | Cape Town Bellville South Cohort Study - Baseline evaluation I                                        | Community                    | urban                | 18+                                   | 18+    | 220                                     | 715    | *    |

| Country      | Data years | Survey/study name/citation                                                                        | Level of representative-ness | Rural, urban or both | Age range as used for global analysis |        | Sample size as used for global analysis |         | Note |
|--------------|------------|---------------------------------------------------------------------------------------------------|------------------------------|----------------------|---------------------------------------|--------|-----------------------------------------|---------|------|
|              |            |                                                                                                   |                              |                      | Male                                  | Female | Male                                    | Female  |      |
| South Africa | 2010       | Africa Centre Biomeasure Survey                                                                   | Community                    | rural                | 18+                                   | 18+    | 2271                                    | 5718    | *    |
| South Africa | 2010-2011  | National Income Dynamics Study Wave II                                                            | National                     | both                 | 18+                                   | 18+    | 5331                                    | 7839    | †    |
| South Africa | 2012       | National Income Dynamics Study Wave III                                                           | National                     | both                 | 18+                                   | 18+    | 6458                                    | 9628    | †    |
| South Africa | 2012       | South African National Health and Nutrition Examination Survey                                    | National                     | both                 | 18+                                   | 18+    | 2274                                    | 4320    | *    |
| South Africa | 2014-2015  | Health and Aging in Africa: A Longitudinal Study of an INDEPTH Community in South Africa (HAALSI) | Community                    | rural                | 40+                                   | 40+    | 2141                                    | 2502    | †    |
| South Korea  | 1986       | INTERSALT                                                                                         | Community                    | urban                | 20-59                                 | 20-59  | 100                                     | 98      | †    |
| South Korea  | 1990       | Korean National Blood Pressure Survey                                                             | National                     | both                 | 30+                                   | 30+    | 9734                                    | 12620   | *    |
| South Korea  | 1992-1993  | Park et al., Diabetes Res Clin Pract 34 Suppl:S65-72, 1996                                        | Subnational                  | both                 | 30-89                                 | 30+    | 1077                                    | 1392    | *    |
| South Korea  | 1997-1998  | National Anthropometric Survey in Korean Children and Adolescents                                 | National                     | both                 | 18-19                                 | 18-19  | 2488                                    | 2443    | *    |
| South Korea  | 1998       | Korea National Health and Nutrition Examination Survey                                            | National                     | both                 | 18+                                   | 18+    | 3741                                    | 4488    | *    |
| South Korea  | 1999       | The South Korean Conscription Database                                                            | National                     | both                 | 19                                    |        | 401721                                  |         | *    |
| South Korea  | 2000       | The South Korean Conscription Database                                                            | National                     | both                 | 19                                    |        | 402758                                  |         | *    |
| South Korea  | 2001       | Kim et al., Br J Psychiatry 185:102-7, 2004                                                       | Community                    | both                 | 65+                                   | 65+    | 300                                     | 432     | *    |
| South Korea  | 2001       | The South Korean Conscription Database                                                            | National                     | both                 | 19                                    |        | 398653                                  |         | *    |
| South Korea  | 2001       | Korea National Health and Nutrition Examination Survey                                            | National                     | both                 | 18+                                   | 18+    | 2974                                    | 3763    | *    |
| South Korea  | 2002       | The South Korean Conscription Database                                                            | National                     | both                 | 19                                    |        | 367024                                  |         | *    |
| South Korea  | 2002-2003  | Korean National Health Insurance                                                                  | National                     | both                 | 40+                                   | 40+    | 2979612                                 | 2470515 | *    |
| South Korea  | 2003       | The South Korean Conscription Database                                                            | National                     | both                 | 19                                    |        | 329626                                  |         | *    |
| South Korea  | 2004       | The South Korean Conscription Database                                                            | National                     | both                 | 19                                    |        | 323001                                  |         | *    |
| South Korea  | 2004-2005  | Korean National Health Insurance                                                                  | National                     | both                 | 40+                                   | 40+    | 3586415                                 | 3244400 | *    |
| South Korea  | 2005       | The South Korean Conscription Database                                                            | National                     | both                 | 19                                    |        | 313378                                  |         | *    |
| South Korea  | 2005       | Korea National Health and Nutrition Examination Survey                                            | National                     | both                 | 18+                                   | 18+    | 2392                                    | 3157    | *    |
| South Korea  | 2005       | National Anthropometric Survey in Korean Children and Adolescents                                 | National                     | both                 | 18-19                                 | 18-19  | 3629                                    | 3273    | *    |
| South Korea  | 2006       | The South Korean Conscription Database                                                            | National                     | both                 | 19                                    |        | 302587                                  |         | *    |
| South Korea  | 2006-2007  | Korean National Health Insurance                                                                  | National                     | both                 | 40+                                   | 40+    | 4325472                                 | 4348260 | *    |
| South Korea  | 2007       | The South Korean Conscription Database                                                            | National                     | both                 | 19                                    |        | 312795                                  |         | *    |
| South Korea  | 2007       | Korea National Health and Nutrition Examination Survey                                            | National                     | both                 | 18+                                   | 18+    | 1276                                    | 1756    | *    |
| South Korea  | 2008       | The South Korean Conscription Database                                                            | National                     | both                 | 19                                    |        | 312919                                  |         | *    |
| South Korea  | 2008       | Korea National Health and Nutrition Examination Survey                                            | National                     | both                 | 18+                                   | 18+    | 2875                                    | 3943    | *    |
| South Korea  | 2008-2009  | Korean National Health Insurance                                                                  | National                     | both                 | 40+                                   | 40+    | 5480812                                 | 5733446 | *    |
| South Korea  | 2009       | The South Korean Conscription Database                                                            | National                     | both                 | 19                                    |        | 324818                                  |         | *    |
| South Korea  | 2009       | Korea National Health and Nutrition Examination Survey                                            | National                     | both                 | 18+                                   | 18+    | 3313                                    | 4266    | *    |
| South Korea  | 2009       | Korea National School Health Examination Survey (KNSHES)                                          | National                     | both                 | 18-20                                 | 18-20  | 6177                                    | 5182    | *    |
| South Korea  | 2010       | The South Korean Conscription Database                                                            | National                     | both                 | 19                                    |        | 347249                                  |         | *    |
| South Korea  | 2010       | Korea National Health and Nutrition Examination Survey                                            | National                     | both                 | 18+                                   | 18+    | 2755                                    | 3585    | *    |
| South Korea  | 2010       | Korea National School Health Examination Survey (KNSHES)                                          | National                     | both                 | 18-20                                 | 18-20  | 2130                                    | 954     | *    |
| South Korea  | 2010-2011  | Korean National Health Insurance                                                                  | National                     | both                 | 40+                                   | 40+    | 6639239                                 | 7094118 | *    |
| South Korea  | 2011       | The South Korean Conscription Database                                                            | National                     | both                 | 19                                    |        | 364982                                  |         | *    |
| South Korea  | 2011       | Korea National Health and Nutrition Examination Survey                                            | National                     | both                 | 18+                                   | 18+    | 2677                                    | 3561    | *    |
| South Korea  | 2011       | Korea National School Health Examination Survey (KNSHES)                                          | National                     | both                 | 18-20                                 | 18-20  | 2597                                    | 1874    | *    |
| South Korea  | 2012       | The South Korean Conscription Database                                                            | National                     | both                 | 19                                    |        | 361009                                  |         | *    |
| South Korea  | 2012       | Korea National Health and Nutrition Examination Survey                                            | National                     | both                 | 18+                                   | 18+    | 2529                                    | 3481    | *    |
| South Korea  | 2012       | Korea National School Health Examination Survey (KNSHES)                                          | National                     | both                 | 18-20                                 | 18-20  | 1282                                    | 1066    | *    |
| South Korea  | 2012-2013  | Korean National Health Insurance                                                                  | National                     | both                 | 40+                                   | 40+    | 7220230                                 | 7744568 | *    |
| South Korea  | 2013       | The South Korean Conscription Database                                                            | National                     | both                 | 19                                    |        | 363914                                  |         | *    |
| South Korea  | 2013       | Korea National Health and Nutrition Examination Survey                                            | National                     | both                 | 18+                                   | 18+    | 2513                                    | 3309    | *    |
| South Korea  | 2013       | Korea National School Health Examination Survey (KNSHES)                                          | National                     | both                 | 18-20                                 | 18-20  | 1267                                    | 1106    | *    |
| South Korea  | 2014       | The South Korean Conscription Database                                                            | National                     | both                 | 19                                    |        | 363597                                  |         | *    |
| South Korea  | 2014       | Korea National Health and Nutrition Examination Survey                                            | National                     | both                 | 18+                                   | 18+    | 2409                                    | 3274    | *    |
| South Korea  | 2014       | Korea National School Health Examination Survey (KNSHES)                                          | National                     | both                 | 18-20                                 | 18-20  | 1246                                    | 1201    | *    |
| South Korea  | 2014-2015  | Korean National Health Insurance                                                                  | National                     | both                 | 40+                                   | 40+    | 7832947                                 | 8318037 | *    |
| South Korea  | 2015       | The South Korean Conscription Database                                                            | National                     | both                 | 19                                    |        | 350518                                  |         | *    |
| South Korea  | 2015       | Korea National Health and Nutrition Examination Survey                                            | National                     | both                 | 18+                                   | 18+    | 2495                                    | 3168    | *    |
| South Korea  | 2015       | Korea National School Health Examination Survey (KNSHES)                                          | National                     | both                 | 18-20                                 | 18-20  | 1538                                    | 1595    | *    |
| South Korea  | 2016       | The South Korean Conscription Database                                                            | National                     | both                 | 19                                    |        | 339410                                  |         | *    |
| South Korea  | 2016       | Korea National Health and Nutrition Examination Survey                                            | National                     | both                 | 18+                                   | 18+    | 2677                                    | 3470    | *    |
| South Korea  | 2016       | Korea National School Health Examination Survey (KNSHES)                                          | National                     | both                 | 18-20                                 | 18-20  | 1461                                    | 1482    | *    |
| South Korea  | 2017       | The South Korean Conscription Database                                                            | National                     | both                 | 19                                    |        | 323457                                  |         | *    |
| Spain        | 1985       | INTERSALT, Manresa                                                                                | Community                    | urban                | 20-59                                 | 20-59  | 100                                     | 100     | †    |



| Country        | Data years | Survey/study name/citation                                                                                | Level of representative-ness | Rural, urban or both | Age range as used for global analysis |        | Sample size as used for global analysis |        | Note |
|----------------|------------|-----------------------------------------------------------------------------------------------------------|------------------------------|----------------------|---------------------------------------|--------|-----------------------------------------|--------|------|
|                |            |                                                                                                           |                              |                      | Male                                  | Female | Male                                    | Female |      |
| Spain          | 1986       | INTERSALT, Torrejo                                                                                        | Community                    | urban                | 20-59                                 | 20-59  | 100                                     | 100    | †    |
| Spain          | 1986-1988  | MONICA, Catalonia                                                                                         | Subnational                  | both                 | 25-64                                 | 25-64  | 1251                                    | 1271   | †    |
| Spain          | 1989       | Cardiovascular Risk Factors Study in Catalonia                                                            | Subnational                  | both                 | 18+                                   | 18+    | 315                                     | 359    | *    |
| Spain          | 1989-1994  | SEEDO                                                                                                     | Subnational                  | both                 | 25-60                                 | 25-60  | 2533                                    | 2855   | *    |
| Spain          | 1990       | Banegas et al., Hypertension 32(6):998-1002, 1998                                                         | National                     | both                 | 35-65                                 | 35-65  | 810                                     | 1203   | *    |
| Spain          | 1990-1992  | MONICA, Catalonia                                                                                         | Subnational                  | both                 | 25-64                                 | 25-64  | 1719                                    | 1191   | †    |
| Spain          | 1990-2000  | SEEDO                                                                                                     | Subnational                  | both                 | 25-60                                 | 25-60  | 4707                                    | 5178   | *    |
| Spain          | 1991-1993  | Encuesta de Factores de Riesgo Cardiovascular en la Región de Murcia (Cardiovascular Risk Factors Survey) | Subnational                  | both                 | 18-69                                 | 18-69  | 1512                                    | 1562   | *    |
| Spain          | 1992       | CINDI                                                                                                     | Subnational                  | both                 | 25-64                                 | 25-64  | 1194                                    | 1454   | *    |
| Spain          | 1992       | ENCAT                                                                                                     | Community                    | both                 | 18-80                                 | 18-80  | 786                                     | 952    | *    |
| Spain          | 1994-1995  | Encuesta de Nutrición y Salud Comunidad Valenciana 1994-95 (ENCV)                                         | Subnational                  | urban                | 18+                                   | 18+    | 767                                     | 892    | *    |
| Spain          | 1994-1996  | MONICA, Catalonia                                                                                         | Subnational                  | both                 | 25-64                                 | 25-64  | 1800                                    | 1628   | †    |
| Spain          | 1996       | Guía Study                                                                                                | Community                    | urban                | 30+                                   | 30+    | 305                                     | 384    | *    |
| Spain          | 1996-2002  | Castells et al., J Epidemiol Community Health 60(4):316-21, 2006                                          | Community                    | urban                |                                       | 50-69  |                                         | 26963  | *    |
| Spain          | 1997       | Soriguer et al., Eur J Epidemiol 19(1):33-40, 2004                                                        | Community                    | rural                | 18-65                                 | 18-65  | 613                                     | 613    | *    |
| Spain          | 1998-2000  | EnKID study                                                                                               | National                     | both                 | 18-24                                 | 18-24  | 595                                     | 858    | *    |
| Spain          | 1999-2000  | ENIB                                                                                                      | Community                    | both                 | 20-60                                 | 20-60  | 498                                     | 702    | *    |
| Spain          | 1999-2000  | Factores de riesgo en las islas Baleares: Estudio CORSAIB                                                 | Subnational                  | both                 | 35-74                                 | 35-74  | 811                                     | 865    | *    |
| Spain          | 2000-2001  | Regidor et al., J Hum Hypertens 20(1):73-82, 2006                                                         | National                     | both                 | 60+                                   | 60+    | 1318                                    | 2281   | *    |
| Spain          | 2000-2001  | EUREYE Study                                                                                              | Subnational                  | both                 | 65+                                   | 65+    | 273                                     | 324    | *    |
| Spain          | 2000-2005  | CDC of the Canary Islands                                                                                 | Subnational                  | both                 | 18-75                                 | 18-75  | 2878                                    | 3719   | *    |
| Spain          | 2001-2002  | Catalan Health Interview Survey                                                                           | Subnational                  | both                 | 18-74                                 | 18-74  | 597                                     | 744    | *    |
| Spain          | 2001-2003  | Diabetes, Nutrición y Obesidad en la población adulta de la Región de Murcia (DINO)                       | Subnational                  | both                 | 20+                                   | 20+    | 715                                     | 828    | *    |
| Spain          | 2002-2003  | ENCAT                                                                                                     | Community                    | both                 | 18-80                                 | 18-80  | 712                                     | 813    | *    |
| Spain          | 2003       | The European Male Ageing Study                                                                            | Community                    | both                 | 40+                                   |        | 405                                     |        | *    |
| Spain          | 2003-2005  | Registre Gironi del Cor (REGICOR)                                                                         | Subnational                  | both                 | 35-79                                 | 35-79  | 2934                                    | 3253   | *    |
| Spain          | 2004       | Vioque J et al., Obesity 16:664-70, 2008                                                                  | Community                    | urban                | 24+                                   | 24+    | 87                                      | 115    | *    |
| Spain          | 2004       | Cardiovascular Risk Study in Castilla y León (RECCyL)                                                     | Subnational                  | both                 | 18+                                   | 18+    | 1833                                    | 2027   | *    |
| Spain          | 2004-2006  | PREVICTUS                                                                                                 | National                     | both                 | 60+                                   | 60+    | 3185                                    | 3629   | *    |
| Spain          | 2007-2009  | Harmonizing Equation of Risk in Mediterranean countries Extremadura (HERMEX)                              | Subnational                  | both                 | 25-79                                 | 25-79  | 1298                                    | 1498   | *    |
| Spain          | 2008       | The European Male Ageing Study                                                                            | Community                    | both                 | 40+                                   |        | 272                                     |        | *    |
| Spain          | 2008-2010  | National Study of Nutrition and Cardiovascular Risk (ENRICA)                                              | National                     | both                 | 18+                                   | 18+    | 5756                                    | 6397   | *    |
| Spain          | 2009       | Cardiovascular Risk Study in Castilla y León (RECCyL)                                                     | Subnational                  | both                 | 20+                                   | 20+    | 1315                                    | 1590   | *    |
| Spain          | 2013       | ANIBES Study                                                                                              | National                     | both                 | 18-75                                 | 18-75  | 787                                     | 822    | *    |
| Spain          | 2014       | Cardiovascular Risk Study in Castilla y León (RECCyL)                                                     | Subnational                  | both                 | 20+                                   | 20+    | 1215                                    | 1475   | *    |
| Spain          | 2015       | National Study of Nutrition and Cardiovascular Risk (ENRICA)                                              | National                     | both                 | 65+                                   | 65+    | 711                                     | 770    | *    |
| Sri Lanka      | 2003       | Wijewardene et al., Ceylon Med J 50:62-70, 2005                                                           | Subnational                  | both                 | 30-65                                 | 30-65  | 275                                     | 296    | *    |
| Sri Lanka      | 2003       | Wijewardene et al., Ceylon Med J 50:62-70, 2005                                                           | Subnational                  | both                 | 30-65                                 | 30-65  | 139                                     | 192    | *    |
| Sri Lanka      | 2003       | Wijewardene et al., Ceylon Med J 50:62-70, 2005                                                           | Subnational                  | both                 | 30-65                                 | 30-65  | 1891                                    | 2410   | *    |
| Sri Lanka      | 2003       | Wijewardene et al., Ceylon Med J 50:62-70, 2005                                                           | Subnational                  | both                 | 30-65                                 | 30-65  | 387                                     | 457    | *    |
| Sri Lanka      | 2006       | STEPS                                                                                                     | National                     | both                 | 18-64                                 | 18-64  | 5682                                    | 5922   | †    |
| Sri Lanka      | 2006-2007  | DHS                                                                                                       | National                     | both                 |                                       | 18-49  |                                         | 12539  | *    |
| Sri Lanka      | 2014       | STEPS                                                                                                     | National                     | both                 | 18-69                                 | 18-69  | 1863                                    | 2893   | †    |
| Sudan (former) | 2005       | STEPS                                                                                                     | Subnational                  | both                 | 25-64                                 | 25-64  | 626                                     | 881    | *    |
| Sudan (former) | 2016       | STEPS                                                                                                     | National                     | both                 | 18-69                                 | 18-69  | 2661                                    | 4544   | †    |
| Suriname       | 2013-2015  | The Healthy Life in Suriname Study (HELISUR)                                                              | Subnational                  | urban                | 18-70                                 | 18-70  | 424                                     | 722    | *    |
| Swaziland      | 2006-2007  | DHS                                                                                                       | National                     | both                 | 18-49                                 | 18-49  | 3252                                    | 3970   | †    |
| Swaziland      | 2014       | STEPS                                                                                                     | National                     | both                 | 18-69                                 | 18-69  | 986                                     | 1848   | †    |
| Sweden         | 1982       | The Swedish Conscription Database                                                                         | National                     | both                 | 18                                    |        | 28487                                   |        | 1*   |
| Sweden         | 1983       | The Swedish Conscription Database                                                                         | National                     | both                 | 18                                    |        | 28020                                   |        | 1*   |
| Sweden         | 1984       | The Swedish Conscription Database                                                                         | National                     | both                 | 18                                    |        | 17397                                   |        | 1*   |
| Sweden         | 1985       | MONICA Gothenburg                                                                                         | Community                    | urban                | 25-64                                 | 25-64  | 666                                     | 702    | †    |
| Sweden         | 1985       | The Swedish Conscription Database                                                                         | National                     | both                 | 18                                    |        | 9237                                    |        | *    |
| Sweden         | 1985-1989  | Västerbotten Intervention Project                                                                         | Subnational                  | both                 | 25-64                                 | 25-64  | 1676                                    | 1554   | *    |
| Sweden         | 1985-1996  | EPIC Umea                                                                                                 | Subnational                  | both                 | 24-72                                 | 24-72  | 12359                                   | 13217  | *    |
| Sweden         | 1986       | MONICA Northern Sweden                                                                                    | Subnational                  | both                 | 25-64                                 | 25-64  | 610                                     | 598    | †    |
| Sweden         | 1986       | The Swedish Conscription Database                                                                         | National                     | both                 | 18                                    |        | 29739                                   |        | *    |
| Sweden         | 1987       | The Swedish Conscription Database                                                                         | National                     | both                 | 18                                    |        | 33855                                   |        | *    |
| Sweden         | 1988       | The Swedish Conscription Database                                                                         | National                     | both                 | 18                                    |        | 30456                                   |        | *    |

| Country     | Data years | Survey/study name/citation                                              | Level of representative-ness | Rural, urban or both | Age range as used for global analysis |        | Sample size as used for global analysis |        | Note |
|-------------|------------|-------------------------------------------------------------------------|------------------------------|----------------------|---------------------------------------|--------|-----------------------------------------|--------|------|
|             |            |                                                                         |                              |                      | Male                                  | Female | Male                                    | Female |      |
| Sweden      | 1989       | The Swedish Conscription Database                                       | National                     | both                 | 18                                    |        | 33678                                   |        | *    |
| Sweden      | 1990       | MONICA Northern Sweden                                                  | Subnational                  | both                 | 25-64                                 | 25-64  | 570                                     | 589    | †    |
| Sweden      | 1990       | MONICA Gothenburg                                                       | Community                    | urban                | 25-64                                 | 25-64  | 775                                     | 775    | †    |
| Sweden      | 1990       | The Swedish Conscription Database                                       | National                     | both                 | 18                                    |        | 35633                                   |        | *    |
| Sweden      | 1990-1992  | Västerbotten Intervention Project                                       | Subnational                  | both                 | 25-64                                 | 25-64  | 7263                                    | 7804   | *    |
| Sweden      | 1991       | The Swedish Conscription Database                                       | National                     | both                 | 18                                    |        | 35851                                   |        | *    |
| Sweden      | 1991-1995  | Uppsala Longitudinal Study of Adult Men                                 | Community                    | both                 | 70                                    |        | 1215                                    |        | *    |
| Sweden      | 1991-1996  | Malmö Diet and Cancer                                                   | Community                    | urban                | 45-73                                 | 45-73  | 12096                                   | 18293  | *    |
| Sweden      | 1992       | The Swedish Conscription Database                                       | National                     | both                 | 18                                    |        | 33496                                   |        | *    |
| Sweden      | 1992-1993  | Population Study of Women in Gothenburg                                 | Community                    | urban                |                                       | 62-84  |                                         | 802    | *    |
| Sweden      | 1993       | The Swedish Conscription Database                                       | National                     | both                 | 18                                    |        | 32442                                   |        | *    |
| Sweden      | 1993-1995  | Västerbotten Intervention Project                                       | Subnational                  | both                 | 25-64                                 | 25-64  | 9804                                    | 10727  | *    |
| Sweden      | 1994       | Helicobacter Pylori                                                     | Community                    | urban                | 56-65                                 | 56-65  | 170                                     | 217    | *    |
| Sweden      | 1994       | MONICA Northern Sweden                                                  | Subnational                  | both                 | 25-74                                 | 25-74  | 686                                     | 682    | †    |
| Sweden      | 1994       | The Swedish Conscription Database                                       | National                     | both                 | 18                                    |        | 30614                                   |        | *    |
| Sweden      | 1994-1996  | Kungsholmen Project                                                     | Community                    | urban                | 75+                                   | 75+    | 160                                     | 160    | *    |
| Sweden      | 1995       | MONICA Gothenburg                                                       | Community                    | urban                | 25-64                                 | 25-64  | 745                                     | 867    | †    |
| Sweden      | 1995       | The Swedish Conscription Database                                       | National                     | both                 | 18                                    |        | 30299                                   |        | *    |
| Sweden      | 1996       | The Swedish Conscription Database                                       | National                     | both                 | 18                                    |        | 27042                                   |        | *    |
| Sweden      | 1996-1998  | Västerbotten Intervention Project                                       | Subnational                  | both                 | 25-64                                 | 25-64  | 8327                                    | 8893   | *    |
| Sweden      | 1997       | The Swedish Conscription Database                                       | National                     | both                 | 18                                    |        | 27230                                   |        | *    |
| Sweden      | 1997-2001  | Uppsala Longitudinal Study of Adult Men                                 | Community                    | both                 | 77                                    |        | 783                                     |        | *    |
| Sweden      | 1998       | The Swedish Conscription Database                                       | National                     | both                 | 18                                    |        | 34111                                   |        | *    |
| Sweden      | 1998-2001  | The Kalixanda study                                                     | Community                    | both                 | 20+                                   | 20+    | 508                                     | 483    | *    |
| Sweden      | 1999       | MONICA Northern Sweden                                                  | Subnational                  | both                 | 25-74                                 | 25-74  | 660                                     | 657    | *    |
| Sweden      | 1999       | The Swedish Conscription Database                                       | National                     | both                 | 18                                    |        | 30143                                   |        | *    |
| Sweden      | 1999-2003  | Västerbotten Intervention Project                                       | Subnational                  | both                 | 25-64                                 | 25-64  | 6354                                    | 6384   | *    |
| Sweden      | 2000       | The Swedish Conscription Database                                       | National                     | both                 | 18                                    |        | 23619                                   |        | *    |
| Sweden      | 2000-2001  | H70 Study                                                               | Community                    | urban                | 70                                    | 70     | 242                                     | 270    | *    |
| Sweden      | 2001       | The Swedish Conscription Database                                       | National                     | both                 | 18                                    |        | 23717                                   |        | *    |
| Sweden      | 2001-2003  | Uppsala Longitudinal Study of Adult Men                                 | Community                    | both                 | 82                                    |        | 511                                     |        | *    |
| Sweden      | 2001-2004  | Swedish INTERGENE Cohort Study                                          | Subnational                  | both                 | 24-76                                 | 24-76  | 1694                                    | 1906   | *    |
| Sweden      | 2001-2004  | Prospective Investigation of the Vasculature in Uppsala Seniors (PIVUS) | Community                    | both                 | 70                                    | 70     | 507                                     | 509    | *    |
| Sweden      | 2002       | The Swedish Conscription Database                                       | National                     | both                 | 18                                    |        | 20070                                   |        | *    |
| Sweden      | 2003       | The European Male Ageing Study                                          | Community                    | both                 | 40+                                   |        | 396                                     |        | *    |
| Sweden      | 2003       | The Swedish Conscription Database                                       | National                     | both                 | 18                                    |        | 25062                                   |        | *    |
| Sweden      | 2003-2004  | Welin et al., BMC Public Health 8:403, 2008                             | Community                    | urban                | 50                                    | 50     | 595                                     | 655    | *    |
| Sweden      | 2003-2004  | Welin et al., BMC Public Health 8:403, 2008                             | Community                    | urban                | 60                                    |        | 667                                     |        | *    |
| Sweden      | 2004       | MONICA Northern Sweden                                                  | Subnational                  | both                 | 26-75                                 | 26-75  | 722                                     | 706    | *    |
| Sweden      | 2004       | The Swedish Conscription Database                                       | National                     | both                 | 18                                    |        | 23784                                   |        | *    |
| Sweden      | 2004-2005  | European Youth Heart Study (EYHS) II                                    | Subnational                  | urban                | 18-21                                 | 18-21  | 70                                      | 111    | *    |
| Sweden      | 2004-2005  | Population Study of Women in Gothenburg                                 | Community                    | urban                |                                       | 38-50  |                                         | 494    | *    |
| Sweden      | 2005       | The Swedish Conscription Database                                       | National                     | both                 | 18                                    |        | 20818                                   |        | *    |
| Sweden      | 2005-2006  | H70 Study                                                               | Community                    | urban                | 75                                    | 75     | 320                                     | 422    | *    |
| Sweden      | 2006-2009  | Prospective Investigation of the Vasculature in Uppsala Seniors (PIVUS) | Community                    | both                 | 75                                    | 75     | 407                                     | 419    | *    |
| Sweden      | 2008       | The European Male Ageing Study                                          | Community                    | both                 | 40+                                   |        | 353                                     |        | *    |
| Sweden      | 2009       | MONICA Northern Sweden                                                  | Subnational                  | both                 | 25-74                                 | 25-74  | 629                                     | 622    | *    |
| Sweden      | 2011-2014  | EpiHealth                                                               | National                     | both                 | 45-75                                 | 45-75  | 4731                                    | 6054   | *    |
| Sweden      | 2014       | MONICA Northern Sweden                                                  | Subnational                  | both                 | 25-74                                 | 25-74  | 551                                     | 602    | *    |
| Switzerland | 1984-1986  | The Swiss MONICA Study Wave I                                           | Subnational                  | both                 | 25-74                                 | 25-74  | 1744                                    | 1689   | †    |
| Switzerland | 1988-1989  | The Swiss MONICA Study Wave II                                          | Subnational                  | both                 | 25-74                                 | 25-74  | 1778                                    | 1684   | †    |
| Switzerland | 1992-1993  | The Swiss MONICA Study Wave III                                         | Subnational                  | both                 | 25-74                                 | 25-74  | 1577                                    | 1672   | †    |
| Switzerland | 2003-2006  | Cohorte Lausannoise                                                     | Community                    | urban                | 35-75                                 | 35-75  | 3186                                    | 3536   | *    |
| Switzerland | 2004       | The Swiss Conscription Database                                         | National                     | both                 | 18-20                                 |        | 20491                                   |        | *    |
| Switzerland | 2005       | The Swiss Conscription Database                                         | National                     | both                 | 18-20                                 |        | 32131                                   |        | *    |
| Switzerland | 2006       | The Swiss Conscription Database                                         | National                     | both                 | 18-20                                 |        | 34530                                   |        | *    |
| Switzerland | 2007       | The Swiss Conscription Database                                         | National                     | both                 | 18-20                                 |        | 36194                                   |        | *    |
| Switzerland | 2007-2012  | Bus Santé Study                                                         | Subnational                  | urban                | 20-80                                 | 20-80  | 1884                                    | 1911   | *    |
| Switzerland | 2008       | The Swiss Conscription Database                                         | National                     | both                 | 18-20                                 |        | 34497                                   |        | *    |

| Country              | Data years | Survey/study name/citation                                                           | Level of representative-ness | Rural, urban or both | Age range as used for global analysis |        | Sample size as used for global analysis |        | Note |
|----------------------|------------|--------------------------------------------------------------------------------------|------------------------------|----------------------|---------------------------------------|--------|-----------------------------------------|--------|------|
|                      |            |                                                                                      |                              |                      | Male                                  | Female | Male                                    | Female |      |
| Switzerland          | 2009       | The Swiss Conscription Database                                                      | National                     | both                 | 18-20                                 |        | 34896                                   |        | *    |
| Switzerland          | 2009-2012  | Cohorte Lausannoise                                                                  | Community                    | urban                | 40-81                                 | 40-81  | 2176                                    | 2494   | *    |
| Switzerland          | 2010       | The Swiss Conscription Database                                                      | National                     | both                 | 18-20                                 |        | 33815                                   |        | *    |
| Switzerland          | 2011       | The Swiss Conscription Database                                                      | National                     | both                 | 18-20                                 |        | 34495                                   |        | *    |
| Switzerland          | 2012       | The Swiss Conscription Database                                                      | National                     | both                 | 18-20                                 |        | 33590                                   |        | *    |
| Switzerland          | 2013       | The Swiss Conscription Database                                                      | National                     | both                 | 18-20                                 |        | 32882                                   |        | *    |
| Switzerland          | 2014       | The Swiss Conscription Database                                                      | National                     | both                 | 18-20                                 |        | 32687                                   |        | *    |
| Switzerland          | 2014-2017  | Cohorte Lausannoise                                                                  | Community                    | urban                | 45-87                                 | 45-87  | 2008                                    | 2473   | *    |
| Switzerland          | 2015       | The Swiss Conscription Database                                                      | National                     | both                 | 18-20                                 |        | 32604                                   |        | *    |
| Syrian Arab Republic | 2002       | National survey on non-communicable diseases and factors affecting their development | National                     | both                 | 18-64                                 | 18-64  | 3155                                    | 4045   | *    |
| Taiwan               | 1985       | INTERSALT                                                                            | Community                    | rural                | 20-59                                 | 20-59  | 89                                      | 92     | †    |
| Taiwan               | 1989-1991  | Chiu et al., J Gerontol A Biol Sci Med Sci 55(11):M684-90, 2000                      | Subnational                  | both                 | 65+                                   | 65+    | 1322                                    | 1308   | *    |
| Taiwan               | 1993-1994  | The Kinmen Neurological Disorders Survey                                             | Community                    | urban                | 50+                                   | 50+    | 672                                     | 593    | *    |
| Taiwan               | 1993-1996  | Nutrition and Health Survey in Taiwan 1993-1996                                      | National                     | both                 | 18+                                   | 18+    | 1506                                    | 1704   | †    |
| Taiwan               | 1999-2000  | Nutrition and Health Survey in Taiwan 1999-2000                                      | National                     | both                 | 65+                                   | 65+    | 1271                                    | 1202   | †    |
| Taiwan               | 2004-2005  | TCHS                                                                                 | Community                    | urban                | 40+                                   | 40+    | 1147                                    | 1212   | *    |
| Taiwan               | 2005-2008  | Nutrition and Health Survey in Taiwan 2005-2008                                      | National                     | both                 | 19+                                   | 19+    | 1311                                    | 1355   | †    |
| Taiwan               | 2007       | Taiwanese Survey on Hypertension, Hyperglycemia and Hyperlipidemia                   | National                     | both                 | 20+                                   | 20+    | 2155                                    | 2490   | *    |
| Taiwan               | 2013-2016  | Nutrition and Health Survey in Taiwan                                                | National                     | both                 | 18+                                   | 18+    | 1546                                    | 1622   | †    |
| Tajikistan           | 2003       | Micronutrient Status Survey                                                          | National                     | both                 |                                       | 18-49  |                                         | 1806   | *    |
| Tajikistan           | 2012       | DHS                                                                                  | National                     | both                 |                                       | 18-49  |                                         | 7724   | †    |
| Tajikistan           | 2016       | STEPS                                                                                | National                     | both                 | 18-69                                 | 18-69  | 1091                                    | 1553   | †    |
| Tanzania             | 1991-1992  | DHS                                                                                  | National                     | both                 |                                       | 20-49  |                                         | 4039   | †    |
| Tanzania             | 1996       | DHS                                                                                  | National                     | both                 |                                       | 20-49  |                                         | 3512   | †    |
| Tanzania             | 1996-1997  | Aspray et al., Trans R Soc Trop Med Hyg 94:637-44, 2000                              | Community                    | both                 | 18+                                   | 18+    | 368                                     | 442    | *    |
| Tanzania             | 1998-1999  | Bovet et al., Int J Epidemiol 31(1):240-7, 2002                                      | Community                    | urban                | 25-64                                 | 25-64  | 3593                                    | 5646   | *    |
| Tanzania             | 2004-2005  | DHS                                                                                  | National                     | both                 |                                       | 18-49  |                                         | 7854   | †    |
| Tanzania             | 2010       | DHS                                                                                  | National                     | both                 |                                       | 18-49  |                                         | 7746   | †    |
| Tanzania             | 2011       | STEPS                                                                                | Subnational                  | both                 | 25-64                                 | 25-64  | 1008                                    | 1517   | †    |
| Tanzania             | 2012       | STEPS                                                                                | National                     | both                 | 25-64                                 | 25-64  | 2581                                    | 2827   | †    |
| Tanzania             | 2014       | Dar es Salaam Urban Cohort Hypertension Study                                        | Community                    | urban                | 40+                                   | 40+    | 965                                     | 1266   | *    |
| Tanzania             | 2015-2016  | DHS                                                                                  | National                     | both                 |                                       | 18-49  |                                         | 10376  | †    |
| Thailand             | 1987       | INCLIN                                                                               | Community                    | rural                | 35-65                                 |        | 244                                     |        | *    |
| Thailand             | 1989       | INCLIN                                                                               | Community                    | both                 | 35-65                                 |        | 416                                     |        | *    |
| Thailand             | 1991       | Thailand National Health Examination Survey I                                        | National                     | both                 | 18+                                   | 18+    | 5771                                    | 8140   | *    |
| Thailand             | 1995       | The Fourth National Nutrition Survey of Thailand                                     | National                     | both                 | 20-60                                 | 20-60  | 1405                                    | 3631   | *    |
| Thailand             | 1997       | Thailand National Health Examination Survey II                                       | National                     | both                 | 18-59                                 | 18-59  | 1183                                    | 2023   | *    |
| Thailand             | 2000       | InterASIA                                                                            | National                     | both                 | 35+                                   | 35+    | 2092                                    | 3211   | *    |
| Thailand             | 2003-2004  | The Fifth National Nutrition Survey of Thailand                                      | National                     | both                 | 19+                                   | 19+    | 1961                                    | 3366   | *    |
| Thailand             | 2004       | Thailand National Health Examination Survey III                                      | National                     | both                 | 18+                                   | 18+    | 18442                                   | 19862  | *    |
| Thailand             | 2009       | Thailand National Health Examination Survey IV                                       | National                     | both                 | 18+                                   | 18+    | 9262                                    | 10247  | *    |
| Timor-Leste          | 2009-2010  | DHS                                                                                  | National                     | both                 |                                       | 18-49  |                                         | 10009  | †    |
| Timor-Leste          | 2009-2010  | Timor-Leste Eye Health Survey                                                        | Subnational                  | both                 | 40+                                   | 40+    | 244                                     | 247    | *    |
| Timor-Leste          | 2014       | STEPS                                                                                | National                     | both                 | 18-69                                 | 18-69  | 1048                                    | 1437   | †    |
| Timor-Leste          | 2016       | DHS                                                                                  | National                     | both                 | 18-59                                 | 18-49  | 3903                                    | 9826   | †    |
| Togo                 | 1998       | DHS                                                                                  | National                     | both                 |                                       | 20-49  |                                         | 3114   | †    |
| Togo                 | 2010       | STEPS                                                                                | National                     | both                 | 18-64                                 | 18-64  | 1897                                    | 1961   | †    |
| Togo                 | 2013-2014  | DHS                                                                                  | National                     | both                 |                                       | 18-49  |                                         | 3877   | †    |
| Togo                 | 2014       | Impact evaluation of a cash transfer program in North Togo                           | Subnational                  | rural                |                                       | 20-65  |                                         | 3588   | *    |
| Tokelau              | 2005       | STEPS                                                                                | National                     | both                 | 18-64                                 | 18-64  | 241                                     | 267    | †    |
| Tokelau              | 2014       | STEPS                                                                                | National                     | both                 | 18-64                                 | 18-64  | 261                                     | 276    | †    |
| Tonga                | 2004       | STEPS                                                                                | National                     | both                 | 18-64                                 | 18-64  | 390                                     | 546    | †    |
| Tonga                | 2005-2007  | Pacific Obesity Prevention in Communities - Ma'alahi Youth Project                   | Subnational                  | rural                | 18-19                                 | 18-19  | 105                                     | 137    | *    |
| Tonga                | 2007-2008  | Pacific Obesity Prevention in Communities - Ma'alahi Youth Project                   | Subnational                  | rural                | 18-22                                 | 18-22  | 144                                     | 218    | *    |
| Tonga                | 2011       | STEPS                                                                                | National                     | both                 | 18-64                                 | 18-64  | 878                                     | 1401   | †    |
| Trinidad and Tobago  | 1985       | INTERSALT                                                                            | Community                    | urban                | 20-59                                 | 20-59  | 84                                      | 92     | †    |
| Trinidad and Tobago  | 2001       | Adult Survey                                                                         | National                     | rural                | 25+                                   | 25+    | 198                                     | 267    | *    |
| Tunisia              | 1996-1997  | Ariana Healthy Project 1997                                                          | Community                    | both                 | 35-65                                 | 35-65  | 2645                                    | 2704   | *    |
| Tunisia              | 1996-1997  | Tunisian National Nutrition Survey 1996-1997                                         | National                     | both                 | 18+                                   | 18+    | 1397                                    | 2674   | *    |

| Country              | Data years | Survey/study name/citation                                                                                     | Level of representative-ness | Rural, urban or both | Age range as used for global analysis |        | Sample size as used for global analysis |        | Note |
|----------------------|------------|----------------------------------------------------------------------------------------------------------------|------------------------------|----------------------|---------------------------------------|--------|-----------------------------------------|--------|------|
|                      |            |                                                                                                                |                              |                      | Male                                  | Female | Male                                    | Female |      |
| Tunisia              | 2005       | Aounallah et al., Public Health 12(1):98, 2012                                                                 | National                     | both                 | 18-19                                 | 18-19  | 451                                     | 583    | *    |
| Tunisia              | 2005       | Tunisian National Survey                                                                                       | National                     | both                 | 35-71                                 | 35-71  | 3350                                    | 4442   | *    |
| Tunisia              | 2009-2010  | ObeMaghreb                                                                                                     | Subnational                  | urban                | 18-49                                 | 18-49  | 998                                     | 696    | *    |
| Turkey               | 1990       | Turkish Adult Risk Factor Study                                                                                | National                     | both                 | 20+                                   | 20+    | 1331                                    | 1366   | *    |
| Turkey               | 1993       | DHS                                                                                                            | National                     | both                 |                                       | 20-49  |                                         | 2294   | †    |
| Turkey               | 1995       | Turkish Adult Risk Factor Study                                                                                | National                     | both                 | 25+                                   | 25+    | 855                                     | 879    | *    |
| Turkey               | 1998       | DHS                                                                                                            | National                     | both                 |                                       | 20-49  |                                         | 2210   | †    |
| Turkey               | 1998       | Turkish Adult Risk Factor Study                                                                                | National                     | both                 | 28+                                   | 28+    | 870                                     | 906    | *    |
| Turkey               | 1998-1999  | Erem et al., Diabetes Res Clin Pract 54(3):203-8, 2001                                                         | Community                    | urban                | 20+                                   | 20+    | 1324                                    | 1322   | *    |
| Turkey               | 2000       | MDHS                                                                                                           | Subnational                  | urban                |                                       | 18-49  |                                         | 1420   | *    |
| Turkey               | 2000       | Turkish Adult Risk Factor Study                                                                                | National                     | both                 | 30+                                   | 30+    | 883                                     | 936    | *    |
| Turkey               | 2000-2002  | The Healthy Nutrition for Healthy Heart Study                                                                  | National                     | both                 | 25-84                                 | 25-84  | 4718                                    | 10631  | *    |
| Turkey               | 2001       | Yumuk et al., Diabetes Res Clin Pract 70(2):151-58, 2005                                                       | Community                    | urban                | 20+                                   | 20+    | 1042                                    | 1789   | *    |
| Turkey               | 2001-2002  | Turkish Adult Risk Factor Study                                                                                | National                     | both                 | 32+                                   | 32+    | 1098                                    | 1210   | *    |
| Turkey               | 2002       | Onal et al., Blood Press 13(1):31-6, 2004                                                                      | Subnational                  | urban                | 25+                                   | 25+    | 67                                      | 355    | *    |
| Turkey               | 2003       | DHS                                                                                                            | National                     | both                 |                                       | 20-49  |                                         | 2934   | †    |
| Turkey               | 2003       | Prevalence, awareness, treatment and control of hypertension in Turkey in 2003                                 | National                     | both                 | 18+                                   | 18+    | 1988                                    | 2847   | *    |
| Turkey               | 2003-2004  | Turkish Adult Risk Factor Study                                                                                | National                     | both                 | 34+                                   | 34+    | 1104                                    | 1140   | *    |
| Turkey               | 2003-2005  | Prevalence of prehypertension and associated risk factors among Turkish adults: Trabzon Hypertension Study     | Subnational                  | both                 | 20+                                   | 20+    | 2205                                    | 2601   | *    |
| Turkey               | 2004       | Nationally Representative Cross-sectional Survey                                                               | National                     | both                 | 20+                                   | 20+    | 2110                                    | 2154   | *    |
| Turkey               | 2005-2006  | Turkish Adult Risk Factor Study                                                                                | National                     | both                 | 33+                                   | 33+    | 1029                                    | 1088   | *    |
| Turkey               | 2007       | National Household survey                                                                                      | National                     | both                 | 20-85                                 | 20-85  | 2263                                    | 1842   | *    |
| Turkey               | 2007-2008  | Turkish Adult Risk Factor Study                                                                                | National                     | both                 | 35+                                   | 35+    | 1101                                    | 1133   | *    |
| Turkey               | 2009-2010  | Turkish Adult Risk Factor Study                                                                                | National                     | both                 | 37+                                   | 37+    | 466                                     | 507    | *    |
| Turkey               | 2009-2012  | Prevalence of diabetes and associated risk factors among adult population in Trabzon city                      | Subnational                  | both                 | 20+                                   | 20+    | 1570                                    | 2124   | *    |
| Turkey               | 2011       | Chronic Diseases and Risk Factors Survey in Turkey                                                             | National                     | both                 | 18+                                   | 18+    | 7326                                    | 8205   | *    |
| Turkey               | 2012-2013  | Turkish Adult Risk Factor Study                                                                                | National                     | both                 | 37+                                   | 37+    | 1012                                    | 1087   | *    |
| Turkey               | 2014-2015  | Turkish Adult Risk Factor Study                                                                                | National                     | both                 | 44+                                   | 44+    | 437                                     | 484    | *    |
| Turkey               | 2017       | STEPS                                                                                                          | National                     | both                 | 18+                                   | 18+    | 2230                                    | 3349   | †    |
| Turkmenistan         | 2000       | DHS                                                                                                            | National                     | both                 |                                       | 18-49  |                                         | 2084   | *    |
| Turkmenistan         | 2013       | STEPS                                                                                                          | National                     | both                 | 18-64                                 | 18-64  | 1879                                    | 2741   | †    |
| Uganda               | 1995       | DHS                                                                                                            | National                     | both                 |                                       | 20-49  |                                         | 2831   | †    |
| Uganda               | 2000-2001  | DHS                                                                                                            | National                     | both                 |                                       | 18-49  |                                         | 4983   | †    |
| Uganda               | 2006       | DHS                                                                                                            | National                     | both                 | 18-54                                 | 18-49  | 2091                                    | 2139   | †    |
| Uganda               | 2011       | DHS                                                                                                            | National                     | both                 | 18-54                                 | 18-49  | 1988                                    | 2119   | †    |
| Uganda               | 2011-2012  | The Prevalence and Distribution of Non-communicable Diseases and Their Risk Factors in Kasese District, Uganda | Subnational                  | both                 | 25-79                                 | 25-79  | 232                                     | 182    | *    |
| Uganda               | 2014       | STEPS                                                                                                          | National                     | both                 | 18-69                                 | 18-69  | 1560                                    | 2120   | †    |
| Uganda               | 2016       | DHS                                                                                                            | National                     | both                 | 18-54                                 | 18-54  | 4404                                    | 4594   | †    |
| Ukraine              | 2002       | National Micronutrient Survey                                                                                  | National                     | both                 |                                       | 18-50  |                                         | 816    | *    |
| United Arab Emirates | 1989-1990  | el Mugamer et al., J Trop Med Hyg 98(6):407-15, 1995                                                           | Community                    | both                 | 20+                                   | 20+    | 123                                     | 199    | *    |
| United Arab Emirates | 1999-2000  | Emirates National Diabetes and Coronary Artery Disease Risk Factor Study                                       | National                     | both                 | 20-80                                 | 20-80  | 2822                                    | 3743   | *    |
| United Arab Emirates | 2000-2001  | Carter et al., J Health Popul Nutr 22(1):75-83, 2004                                                           | Community                    | both                 |                                       | 20-79  |                                         | 521    | *    |
| United Arab Emirates | 2009       | Gulf Cooperation Council World Health Survey                                                                   | National                     | both                 | 18+                                   | 18+    | 603                                     | 645    | *    |
| United Kingdom       | 1982       | MRC National Survey of Health and Development                                                                  | National                     | both                 | 36-37                                 | 36-37  | 1632                                    | 1648   | 1†   |
| United Kingdom       | 1984-1986  | Scottish Heart Health Survey                                                                                   | Subnational                  | both                 | 40-59                                 | 40-59  | 4364                                    | 4465   | †    |
| United Kingdom       | 1985       | INTERSALT, Birmingham                                                                                          | Community                    | urban                | 20-59                                 | 20-59  | 100                                     | 100    | †    |
| United Kingdom       | 1985       | INTERSALT, Wales                                                                                               | Community                    | urban                | 20-59                                 | 20-59  | 100                                     | 99     | †    |
| United Kingdom       | 1985-1986  | INTERSALT, Belfast                                                                                             | Community                    | urban                | 20-59                                 | 20-59  | 99                                      | 100    | †    |
| United Kingdom       | 1986-1987  | Dietary and Nutritional Survey of British Adults 1986-1987                                                     | National                     | both                 | 18-64                                 | 18-64  | 1100                                    | 1124   | †    |
| United Kingdom       | 1986-1987  | MONICA, Belfast                                                                                                | Subnational                  | both                 | 25-64                                 | 25-64  | 1155                                    | 1185   | †    |
| United Kingdom       | 1987-1988  | Edinburgh Artery Study                                                                                         | Community                    | urban                | 54-75                                 | 54-75  | 808                                     | 783    | *    |
| United Kingdom       | 1989       | MRC National Survey of Health and Development                                                                  | National                     | both                 | 42-44                                 | 42-44  | 1617                                    | 1608   | †    |
| United Kingdom       | 1991       | National Child Development Study (1958 British Cohort Study)                                                   | National                     | both                 | 33                                    | 33     | 5426                                    | 5605   | †    |
| United Kingdom       | 1991-1992  | Health Survey for England                                                                                      | National                     | both                 | 18+                                   | 18+    | 1668                                    | 1830   | †    |
| United Kingdom       | 1991-1992  | MONICA, Belfast                                                                                                | Subnational                  | both                 | 25-64                                 | 25-64  | 998                                     | 996    | †    |
| United Kingdom       | 1992       | MONICA, Glasgow                                                                                                | Community                    | urban                | 25-64                                 | 25-64  | 696                                     | 775    | †    |
| United Kingdom       | 1992-1993  | Whickham Survey                                                                                                | Community                    | urban                | 35+                                   | 35+    | 676                                     | 784    | *    |
| United Kingdom       | 1992-1994  | Edinburgh Artery Study                                                                                         | Community                    | urban                | 60-81                                 | 60-81  | 580                                     | 582    | *    |
| United Kingdom       | 1993       | Health Survey for England                                                                                      | National                     | both                 | 18+                                   | 18+    | 7225                                    | 8059   | †    |

| Country                  | Data years | Survey/study name/citation                                | Level of representative-ness | Rural, urban or both | Age range as used for global analysis |        | Sample size as used for global analysis |        | Note |
|--------------------------|------------|-----------------------------------------------------------|------------------------------|----------------------|---------------------------------------|--------|-----------------------------------------|--------|------|
|                          |            |                                                           |                              |                      | Male                                  | Female | Male                                    | Female |      |
| United Kingdom           | 1993-1997  | EPIC Norfolk                                              | Subnational                  | both                 | 40-79                                 | 40-79  | 11574                                   | 13995  | *    |
| United Kingdom           | 1993-2000  | EPIC Oxford                                               | Subnational                  | both                 | 20-98                                 | 20-98  | 10851                                   | 37605  | *    |
| United Kingdom           | 1994       | Health Survey for England                                 | National                     | both                 | 18+                                   | 18+    | 6601                                    | 7670   | †    |
| United Kingdom           | 1994-1995  | National Diet and Nutrition Survey (NDNS)                 | National                     | both                 | 65+                                   | 65+    | 701                                     | 687    | †    |
| United Kingdom           | 1995       | Health Survey for England                                 | National                     | both                 | 18+                                   | 18+    | 6525                                    | 7483   | †    |
| United Kingdom           | 1995       | MONICA, Glasgow                                           | Community                    | urban                | 25-64                                 | 25-64  | 855                                     | 958    | †    |
| United Kingdom           | 1995       | Scottish Health Survey (SHeS)                             | Subnational                  | both                 | 18-64                                 | 18-64  | 3207                                    | 3903   | †    |
| United Kingdom           | 1996       | British Cohort Study 1970                                 | National                     | both                 | 26                                    | 26     | 81                                      | 78     | †    |
| United Kingdom           | 1996       | Health Survey for England                                 | National                     | both                 | 18+                                   | 18+    | 6751                                    | 7793   | †    |
| United Kingdom           | 1997       | Health Survey for England                                 | National                     | both                 | 18+                                   | 18+    | 3580                                    | 4103   | †    |
| United Kingdom           | 1997       | National Diet and Nutrition Survey (NDNS)                 | National                     | both                 | 18                                    | 18     | 49                                      | 53     | †    |
| United Kingdom           | 1997-1999  | INTERMAP, West Bromwich                                   | Community                    | urban                | 40-59                                 | 40-59  | 141                                     | 138    | †    |
| United Kingdom           | 1998       | Health Survey for England                                 | National                     | both                 | 18+                                   | 18+    | 6380                                    | 7494   | †    |
| United Kingdom           | 1998       | Scottish Health Survey (SHeS)                             | Subnational                  | both                 | 18-74                                 | 18-74  | 3506                                    | 4444   | †    |
| United Kingdom           | 1998-1999  | INTERMAP, Belfast                                         | Community                    | urban                | 40-59                                 | 40-59  | 125                                     | 97     | †    |
| United Kingdom           | 1998-2000  | The British Regional Heart Study                          | National                     | urban                | 60-79                                 |        | 4138                                    |        | *    |
| United Kingdom           | 1999       | Health Survey for England                                 | National                     | both                 | 18+                                   | 18+    | 3104                                    | 3574   | †    |
| United Kingdom           | 1999       | MRC National Survey of Health and Development             | National                     | both                 | 53-54                                 | 53-54  | 1452                                    | 1496   | †    |
| United Kingdom           | 1999-2001  | British Women's Heart and Health Study                    | National                     | both                 |                                       | 60-79  |                                         | 3678   | 12*  |
| United Kingdom           | 1999-2001  | Edinburgh Artery Study                                    | Community                    | urban                | 66-87                                 | 66-87  | 373                                     | 404    | *    |
| United Kingdom           | 1999-2004  | Hertfordshire Cohort Study                                | Subnational                  | both                 | 59-73                                 | 59-73  | 1571                                    | 1416   | *    |
| United Kingdom           | 2000       | Health Survey for England                                 | National                     | both                 | 18+                                   | 18+    | 3254                                    | 3828   | †    |
| United Kingdom           | 2000-2001  | National Diet and Nutrition Survey 2000-2001              | National                     | both                 | 19-64                                 | 19-64  | 807                                     | 973    | †    |
| United Kingdom           | 2001       | Health Survey for England                                 | National                     | both                 | 18+                                   | 18+    | 6071                                    | 7195   | †    |
| United Kingdom           | 2002       | Health Survey for England                                 | National                     | both                 | 18+                                   | 18+    | 3703                                    | 4506   | †    |
| United Kingdom           | 2003       | The European Male Ageing Study                            | Community                    | both                 | 40+                                   |        | 394                                     |        | *    |
| United Kingdom           | 2003       | Health Survey for England                                 | National                     | both                 | 18+                                   | 18+    | 5787                                    | 6854   | †    |
| United Kingdom           | 2003       | Scottish Health Survey (SHeS)                             | Subnational                  | both                 | 18+                                   | 18+    | 2922                                    | 3583   | †    |
| United Kingdom           | 2004       | Health Survey for England                                 | National                     | both                 | 18+                                   | 18+    | 2365                                    | 3049   | †    |
| United Kingdom           | 2004-2005  | English Longitudinal Study of Ageing Wave 2 2004-2005     | National                     | both                 | 52+                                   | 52+    | 3255                                    | 3961   | †    |
| United Kingdom           | 2005       | Health Survey for England                                 | National                     | both                 | 18+                                   | 18+    | 3768                                    | 4422   | †    |
| United Kingdom           | 2006       | Health Survey for England                                 | National                     | both                 | 18+                                   | 18+    | 5359                                    | 6298   | †    |
| United Kingdom           | 2006-2010  | MRC National Survey of Health and Development             | National                     | both                 | 60-65                                 | 60-65  | 1061                                    | 1156   | †    |
| United Kingdom           | 2007       | Health Survey for England                                 | National                     | both                 | 18+                                   | 18+    | 2632                                    | 3122   | †    |
| United Kingdom           | 2008       | The European Male Ageing Study                            | Community                    | both                 | 40+                                   |        | 301                                     |        | *    |
| United Kingdom           | 2008       | Health Survey for England                                 | National                     | both                 | 18+                                   | 18+    | 5659                                    | 6767   | †    |
| United Kingdom           | 2008       | Scottish Health Survey (SHeS)                             | Subnational                  | both                 | 18+                                   | 18+    | 2392                                    | 2950   | †    |
| United Kingdom           | 2008-2009  | English Longitudinal Study of Ageing Wave 4 2008-2009     | National                     | both                 | 50+                                   | 50+    | 3539                                    | 4296   | †    |
| United Kingdom           | 2008-2012  | National Diet and Nutrition Survey (NDNS)                 | National                     | both                 | 18+                                   | 18+    | 869                                     | 1120   | †    |
| United Kingdom           | 2009       | Health Survey for England                                 | National                     | both                 | 18+                                   | 18+    | 1790                                    | 2054   | †    |
| United Kingdom           | 2009       | Scottish Health Survey (SHeS)                             | Subnational                  | both                 | 18+                                   | 18+    | 2757                                    | 3380   | †    |
| United Kingdom           | 2010       | Health Survey for England                                 | National                     | both                 | 18+                                   | 18+    | 3046                                    | 3737   | †    |
| United Kingdom           | 2010       | Scottish Health Survey (SHeS)                             | Subnational                  | both                 | 18+                                   | 18+    | 2616                                    | 3257   | †    |
| United Kingdom           | 2011       | Health Survey for England                                 | National                     | both                 | 18+                                   | 18+    | 3098                                    | 3769   | †    |
| United Kingdom           | 2011       | Scottish Health Survey (SHeS)                             | Subnational                  | both                 | 18+                                   | 18+    | 2688                                    | 3311   | †    |
| United Kingdom           | 2012       | Health Survey for England                                 | National                     | both                 | 18+                                   | 18+    | 3033                                    | 3687   | †    |
| United Kingdom           | 2012       | Scottish Health Survey (SHeS)                             | Subnational                  | both                 | 18+                                   | 18+    | 1835                                    | 2175   | †    |
| United Kingdom           | 2012-2013  | English Longitudinal Study of Ageing Wave 6 2012-2013     | National                     | both                 | 50+                                   | 50+    | 3257                                    | 4015   | †    |
| United Kingdom           | 2013       | Health Survey for England                                 | National                     | both                 | 18+                                   | 18+    | 3246                                    | 3882   | †    |
| United Kingdom           | 2013       | Scottish Health Survey (SHeS)                             | Subnational                  | both                 | 18+                                   | 18+    | 1781                                    | 2237   | †    |
| United Kingdom           | 2013-2014  | National Diet and Nutrition Survey (NDNS)                 | National                     | both                 | 18+                                   | 18+    | 499                                     | 767    | †    |
| United Kingdom           | 2014       | Health Survey for England                                 | National                     | both                 | 18+                                   | 18+    | 3057                                    | 3700   | †    |
| United Kingdom           | 2014       | Scottish Health Survey (SHeS)                             | Subnational                  | both                 | 18+                                   | 18+    | 1727                                    | 2156   | †    |
| United Kingdom           | 2015       | Health Survey for England                                 | National                     | both                 | 18+                                   | 18+    | 3000                                    | 3634   | †    |
| United Kingdom           | 2015       | MRC National Survey of Health and Development             | National                     | both                 | 69-70                                 | 69-70  | 1040                                    | 1082   | †    |
| United Kingdom           | 2015       | Scottish Health Survey (SHeS)                             | Subnational                  | both                 | 18+                                   | 18+    | 1840                                    | 2151   | †    |
| United Kingdom           | 2016       | Health Survey for England                                 | National                     | both                 | 18+                                   | 18+    | 2851                                    | 3479   | †    |
| United Kingdom           | 2016       | Scottish Health Survey (SHeS)                             | Subnational                  | both                 | 18+                                   | 18+    | 1577                                    | 1944   | †    |
| United States of America | 1985-1986  | Coronary Artery Risk Development in Young Adults (CARDIA) | Subnational                  | urban                | 18-30                                 | 18-30  | 2321                                    | 2775   | *    |

| Country                  | Data years | Survey/study name/citation                                                            | Level of representative-ness | Rural, urban or both | Age range as used for global analysis |        | Sample size as used for global analysis |        | Note |
|--------------------------|------------|---------------------------------------------------------------------------------------|------------------------------|----------------------|---------------------------------------|--------|-----------------------------------------|--------|------|
|                          |            |                                                                                       |                              |                      | Male                                  | Female | Male                                    | Female |      |
| United States of America | 1985-1986  | INTERSALT, Chicago                                                                    | Community                    | urban                | 20-59                                 | 20-59  | 97                                      | 99     | †    |
| United States of America | 1985-1986  | MONICA, Stanford                                                                      | Subnational                  | urban                | 25-64                                 | 25-64  | 713                                     | 848    | 6†   |
| United States of America | 1985-1987  | The Minnesota Heart Survey                                                            | Community                    | both                 | 25-75                                 | 25-75  | 5220                                    | 2421   | *    |
| United States of America | 1986       | INTERSALT, Goodman                                                                    | Community                    | urban                | 20-59                                 | 20-59  | 192                                     | 192    | †    |
| United States of America | 1987-1988  | The Bogalusa Heart Study                                                              | Community                    | rural                | 18-25                                 | 18-25  | 39                                      | 28     | *    |
| United States of America | 1987-1988  | Coronary Artery Risk Development in Young Adults (CARDIA)                             | Subnational                  | urban                | 20-32                                 | 20-32  | 2082                                    | 2506   | *    |
| United States of America | 1987-1989  | Atherosclerosis Risk in Communities Study                                             | Subnational                  | both                 | 44-66                                 | 44-66  | 5041                                    | 6213   | *    |
| United States of America | 1988-1994  | US NHANES III                                                                         | National                     | both                 | 18+                                   | 18+    | 8271                                    | 9097   | †    |
| United States of America | 1989-1990  | Cardiovascular Health Study                                                           | Subnational                  | both                 | 65+                                   | 65+    | 2458                                    | 3318   | *    |
| United States of America | 1989-1990  | MONICA, Stanford                                                                      | Subnational                  | urban                | 25-64                                 | 25-64  | 720                                     | 842    | 6†   |
| United States of America | 1990-1991  | Coronary Artery Risk Development in Young Adults (CARDIA)                             | Subnational                  | urban                | 23-35                                 | 23-35  | 1945                                    | 2382   | *    |
| United States of America | 1990-1991  | Cardiovascular Health Study                                                           | Subnational                  | both                 | 65+                                   | 65+    | 2070                                    | 2707   | *    |
| United States of America | 1990-1992  | Atherosclerosis Risk in Communities Study                                             | Subnational                  | both                 | 46-70                                 | 46-70  | 4537                                    | 5624   | *    |
| United States of America | 1991-1992  | Cardiovascular Health Study                                                           | Subnational                  | both                 | 65+                                   | 65+    | 1919                                    | 2563   | *    |
| United States of America | 1992-1993  | Coronary Artery Risk Development in Young Adults (CARDIA)                             | Subnational                  | urban                | 25-37                                 | 25-37  | 1823                                    | 2163   | *    |
| United States of America | 1992-1993  | Cardiovascular Health Study                                                           | Subnational                  | both                 | 65+                                   | 65+    | 248                                     | 419    | *    |
| United States of America | 1992-1994  | The Bogalusa Heart Study                                                              | Community                    | rural                | 18-25                                 | 18-25  | 53                                      | 34     | *    |
| United States of America | 1993-1994  | Cardiovascular Health Study                                                           | Subnational                  | both                 | 65+                                   | 65+    | 1751                                    | 2471   | *    |
| United States of America | 1993-1995  | Atherosclerosis Risk in Communities Study                                             | Subnational                  | both                 | 48-73                                 | 48-73  | 4000                                    | 5015   | *    |
| United States of America | 1993-1998  | Women's Health Initiative - Observational Study                                       | National                     | both                 |                                       | 49-81  |                                         | 92697  | *    |
| United States of America | 1994-1995  | Cardiovascular Health Study                                                           | Subnational                  | both                 | 65+                                   | 65+    | 1617                                    | 2354   | *    |
| United States of America | 1995-1996  | Coronary Artery Risk Development in Young Adults (CARDIA)                             | Subnational                  | urban                | 28-40                                 | 28-40  | 1739                                    | 2145   | *    |
| United States of America | 1995-1996  | Cardiovascular Health Study                                                           | Subnational                  | both                 | 65+                                   | 65+    | 1478                                    | 2194   | *    |
| United States of America | 1996       | National Longitudinal Study of Adolescent Health Wave II                              | National                     | both                 | 18-21                                 | 18-21  | 486                                     | 440    | 7†   |
| United States of America | 1996-1997  | Cardiovascular Health Study                                                           | Subnational                  | both                 | 65+                                   | 65+    | 1356                                    | 2043   | *    |
| United States of America | 1996-1997  | INTERMAP, Baltimore                                                                   | Community                    | urban                | 40-59                                 | 40-59  | 146                                     | 134    | †    |
| United States of America | 1996-1997  | INTERMAP, Jackson                                                                     | Community                    | urban                | 40-59                                 | 40-59  | 132                                     | 134    | †    |
| United States of America | 1996-1997  | INTERMAP, Pittsburgh                                                                  | Community                    | urban                | 40-59                                 | 40-59  | 132                                     | 128    | †    |
| United States of America | 1996-1997  | Study of Women's Health Across the Nation                                             | Subnational                  | both                 |                                       | 40-55  |                                         | 3200   | 8†   |
| United States of America | 1996-1998  | Atherosclerosis Risk in Communities Study                                             | Subnational                  | both                 | 50-75                                 | 50-75  | 3550                                    | 4485   | *    |
| United States of America | 1996-1998  | INTERMAP, Minneapolis                                                                 | Community                    | urban                | 40-59                                 | 40-59  | 130                                     | 130    | †    |
| United States of America | 1997-1998  | INTERMAP, CC                                                                          | Community                    | urban                | 40-59                                 | 40-59  | 271                                     | 276    | †    |
| United States of America | 1997-1998  | INTERMAP, Chicago                                                                     | Community                    | urban                | 40-59                                 | 40-59  | 156                                     | 159    | †    |
| United States of America | 1997-1998  | Cardiovascular Health Study                                                           | Subnational                  | both                 | 65+                                   | 65+    | 1172                                    | 1801   | *    |
| United States of America | 1997-1999  | Study of Women's Health Across the Nation                                             | Subnational                  | both                 |                                       | 40-55  |                                         | 2761   | 8†   |
| United States of America | 1998-1999  | Cardiovascular Health Study                                                           | Subnational                  | both                 | 65+                                   | 65+    | 1092                                    | 1684   | *    |
| United States of America | 1998-2000  | Study of Women's Health Across the Nation                                             | Subnational                  | both                 |                                       | 40-55  |                                         | 2596   | 8†   |
| United States of America | 1999-2000  | US NHANES 1999-2000                                                                   | National                     | both                 | 18+                                   | 18+    | 2301                                    | 2319   | †    |
| United States of America | 1999-2001  | Study of Women's Health Across the Nation                                             | Subnational                  | both                 |                                       | 40-56  |                                         | 2507   | 8†   |
| United States of America | 2000-2001  | Coronary Artery Risk Development in Young Adults (CARDIA)                             | Subnational                  | urban                | 33-45                                 | 33-45  | 1570                                    | 1949   | *    |
| United States of America | 2000-2002  | Study of Women's Health Across the Nation                                             | Subnational                  | both                 |                                       | 40-57  |                                         | 2441   | 8†   |
| United States of America | 2001-2002  | National Longitudinal Study of Adolescent Health Wave III                             | National                     | both                 | 18-28                                 | 18-28  | 2139                                    | 2443   | 7†   |
| United States of America | 2001-2002  | US NHANES 2001-2002                                                                   | National                     | both                 | 18+                                   | 18+    | 2505                                    | 2418   | †    |
| United States of America | 2003-2004  | US NHANES 2003-2004                                                                   | National                     | both                 | 18+                                   | 18+    | 2499                                    | 2442   | †    |
| United States of America | 2005-2006  | Coronary Artery Risk Development in Young Adults (CARDIA)                             | Subnational                  | urban                | 38-50                                 | 38-50  | 1528                                    | 2000   | *    |
| United States of America | 2005-2006  | Cardiovascular Health Study                                                           | Subnational                  | both                 | 65+                                   | 65+    | 375                                     | 684    | *    |
| United States of America | 2005-2006  | US NHANES 2005-2006                                                                   | National                     | both                 | 18+                                   | 18+    | 2507                                    | 2371   | †    |
| United States of America | 2005-2006  | National Social Life Health and Aging Project                                         | National                     | both                 | 57-85                                 | 57-85  | 1355                                    | 1435   | 9†   |
| United States of America | 2007-2008  | US NHANES 2007-2008                                                                   | National                     | both                 | 18+                                   | 18+    | 2902                                    | 2923   | †    |
| United States of America | 2008-2009  | National Longitudinal Study of Adolescent Health Wave IV                              | National                     | both                 | 24-34                                 | 24-34  | 2045                                    | 2472   | 7†   |
| United States of America | 2009-2010  | US NHANES 2009-2010                                                                   | National                     | both                 | 18+                                   | 18+    | 3050                                    | 3166   | †    |
| United States of America | 2010-2011  | Coronary Artery Risk Development in Young Adults (CARDIA)                             | Subnational                  | urban                | 43-55                                 | 43-55  | 1513                                    | 1976   | *    |
| United States of America | 2010-2011  | National Social Life Health and Aging Project                                         | National                     | both                 | 36-99                                 | 36-99  | 1452                                    | 1736   | 9†   |
| United States of America | 2011-2012  | US NHANES 2011-2012                                                                   | National                     | both                 | 18+                                   | 18+    | 2737                                    | 2732   | †    |
| United States of America | 2011-2013  | Atherosclerosis Risk in Communities Study                                             | Subnational                  | both                 | 67-90                                 | 67-90  | 1787                                    | 2431   | *    |
| United States of America | 2013-2014  | US NHANES 2013-2014                                                                   | National                     | both                 | 18+                                   | 18+    | 2791                                    | 2991   | †    |
| United States of America | 2015-2016  | US NHANES 2015-2016                                                                   | National                     | both                 | 18+                                   | 18+    | 2718                                    | 2875   | †    |
| United States of America | 2015-2016  | National Social Life Health and Aging Project                                         | Community                    | both                 | 24-99                                 | 24-99  | 1995                                    | 2490   | 9†   |
| Uruguay                  | 1999-2000  | The Survey on Health, Well-Being, and Aging in Latin America and the Caribbean (SABE) | Community                    | urban                | 60+                                   | 60+    | 492                                     | 828    | 2†   |

| Country    | Data years | Survey/study name/citation                                                       | Level of representative-ness | Rural, urban or both | Age range as used for global analysis |        | Sample size as used for global analysis |        | Note |
|------------|------------|----------------------------------------------------------------------------------|------------------------------|----------------------|---------------------------------------|--------|-----------------------------------------|--------|------|
|            |            |                                                                                  |                              |                      | Male                                  | Female | Male                                    | Female |      |
| Uruguay    | 2006       | STEPS                                                                            | National                     | both                 | 25-64                                 | 25-64  | 261                                     | 641    | †    |
| Uruguay    | 2011-2012  | CESCAS Study                                                                     | Community                    | urban                | 35-74                                 | 35-74  | 650                                     | 927    | *    |
| Uruguay    | 2012-2016  | Genotype, Phenotype and Environment of Hypertension in Uruguay (GEFA-HT-UY)      | Community                    | urban                | 19+                                   | 19+    | 124                                     | 189    | *    |
| Uzbekistan | 1996       | DHS                                                                              | National                     | both                 |                                       | 18-49  |                                         | 3499   | †    |
| Uzbekistan | 2002       | DHS                                                                              | National                     | both                 | 18-59                                 | 18-49  | 2062                                    | 4559   | †    |
| Uzbekistan | 2014       | STEPS                                                                            | National                     | both                 | 18-64                                 | 18-64  | 1533                                    | 2164   | †    |
| Vanuatu    | 1996       | Second National Nutrition Survey                                                 | National                     | both                 |                                       | 18-50  |                                         | 1353   | *    |
| Vanuatu    | 1998       | Vanuatu Non-communicable Disease Survey                                          | National                     | both                 | 20-60                                 | 20-60  | 533                                     | 730    | *    |
| Vanuatu    | 2005       | STEPS                                                                            | Subnational                  | both                 | 18-60                                 | 18-60  | 583                                     | 701    | †    |
| Vanuatu    | 2011       | STEPS                                                                            | National                     | both                 | 25-64                                 | 25-64  | 2251                                    | 2183   | †    |
| Venezuela  | 1999-2001  | Florez et al., Diabetes Res Clin Pract 69(1):63-77, 2005                         | Subnational                  | both                 | 18+                                   | 18+    | 1134                                    | 2599   | *    |
| Venezuela  | 2000       | Diaz et al., Invest Clin 46(2):111-19, 2005                                      | Community                    | urban                | 60+                                   | 60+    | 42                                      | 59     | *    |
| Venezuela  | 2004-2005  | CARDIOVASCULAR Risk factors Multiple Evaluation in Latin America (CARMELA)       | Community                    | urban                | 25-64                                 | 25-64  | 713                                     | 1123   | *    |
| Venezuela  | 2005-2006  | Brajkovich et al., Rev Ven Endoc Metab 4(3):31-32, 2006                          | Community                    | urban                | 20-65                                 | 20-65  | 205                                     | 439    | *    |
| Venezuela  | 2007-2008  | Venezuelan Study of Metabolic Syndrome, Obesity and Lifestyle (VEMSOLS)          | Community                    | urban                | 20+                                   | 20+    | 107                                     | 230    | *    |
| Venezuela  | 2008-2009  | Venezuelan Study of Metabolic Syndrome, Obesity and Lifestyle (VEMSOLS)          | Community                    | rural                | 20+                                   | 20+    | 51                                      | 89     | *    |
| Venezuela  | 2010-2011  | Venezuelan Study of Metabolic Syndrome, Obesity and Lifestyle (VEMSOLS)          | Community                    | urban                | 20+                                   | 20+    | 66                                      | 193    | *    |
| Venezuela  | 2015-2017  | Cardio-Metabolic Health Venezuelan Study (EVESCAM)                               | National                     | both                 | 20+                                   | 20+    | 1056                                    | 2346   | *    |
| Viet Nam   | 1987-1989  | General Nutrition Survey                                                         | National                     | both                 | 18-70                                 | 18-70  | 13776                                   | 17271  | *    |
| Viet Nam   | 1992-1993  | Living Standard Survey                                                           | National                     | both                 | 18+                                   | 18+    | 5620                                    | 6497   | *    |
| Viet Nam   | 1997-1998  | Living Standard Survey                                                           | National                     | both                 | 18+                                   | 18+    | 7506                                    | 8759   | *    |
| Viet Nam   | 2000       | National Nutrition Survey                                                        | National                     | both                 | 20+                                   | 20+    | 8985                                    | 9464   | *    |
| Viet Nam   | 2001-2002  | Viet Nam National Health Survey 2001-2002                                        | National                     | both                 | 18+                                   | 18+    | 42413                                   | 48739  | *    |
| Viet Nam   | 2001-2003  | The National Epidemiological Survey on Hypertension and Its Risk Factors (North) | Subnational                  | both                 | 25-74                                 | 25-74  | 2386                                    | 3604   | *    |
| Viet Nam   | 2003-2004  | The Survey on Heart Failure and Its Risk Factors                                 | Subnational                  | both                 | 25-74                                 | 25-74  | 1853                                    | 2636   | *    |
| Viet Nam   | 2004       | Cuong et al., Eur J Clin Nutr 61(5):673-81, 2007                                 | Community                    | urban                | 20-60                                 | 20-60  | 717                                     | 771    | *    |
| Viet Nam   | 2004       | The Hypertension Management Programme in Rural Communes (Hanoi)                  | Community                    | rural                | 25-74                                 | 25-74  | 855                                     | 1288   | *    |
| Viet Nam   | 2005       | STEPS Bavi district                                                              | Subnational                  | rural                | 25-64                                 | 25-64  | 987                                     | 997    | *    |
| Viet Nam   | 2005       | National Adult Overweight Survey                                                 | National                     | both                 | 25-64                                 | 25-64  | 8474                                    | 8725   | *    |
| Viet Nam   | 2005       | The Survey on Non-Communicable Disease Risk Factors                              | Subnational                  | both                 | 25-74                                 | 25-74  | 1136                                    | 1220   | *    |
| Viet Nam   | 2005       | Non-communicable disease risk factors in Ho Chi Minh City                        | Community                    | urban                | 25-64                                 | 25-64  | 908                                     | 1063   | *    |
| Viet Nam   | 2006       | The Hypertension Management Programme in Rural Communes (Bavi)                   | Community                    | rural                | 25-74                                 | 25-74  | 395                                     | 643    | *    |
| Viet Nam   | 2006-2008  | The National Epidemiological Survey on Hypertension and Its Risk Factors (South) | Subnational                  | both                 | 25-74                                 | 25-74  | 1310                                    | 2078   | *    |
| Viet Nam   | 2007       | The Hypertension Management Programme in Rural Communes (Phu Phuong)             | Community                    | rural                | 25-74                                 | 25-74  | 364                                     | 616    | *    |
| Viet Nam   | 2008-2009  | The Survey on Diabetes and Its Risk Factors                                      | Subnational                  | both                 | 25-74                                 | 25-74  | 751                                     | 1329   | *    |
| Viet Nam   | 2009       | The Hypertension Management Programme in Rural Communes (Phu Cuong)              | Community                    | rural                | 25-74                                 | 25-74  | 362                                     | 677    | *    |
| Viet Nam   | 2009       | STEPS                                                                            | National                     | both                 | 25-64                                 | 25-64  | 6738                                    | 7805   | †    |
| Viet Nam   | 2009-2010  | General Nutrition Survey                                                         | National                     | both                 | 20+                                   | 20+    | 10810                                   | 11729  | *    |
| Viet Nam   | 2009-2010  | Vietnam National Nutrition Survey 2009-2010                                      | National                     | both                 | 18+                                   | 18+    | 11529                                   | 12115  | *    |
| Viet Nam   | 2012       | National Survey of Diabetes in Viet Nam                                          | National                     | both                 | 30-69                                 | 30-69  | 5319                                    | 5855   | *    |
| Viet Nam   | 2015       | STEPS                                                                            | National                     | both                 | 18-69                                 | 18-69  | 1316                                    | 1721   | †    |
| Yemen      | 1997       | DHS                                                                              | National                     | both                 |                                       | 18-49  |                                         | 5123   | *    |
| Yemen      | 2005-2006  | Yemen Household Budget Survey 2005-2006                                          | National                     | both                 | 18+                                   | 18+    | 1555                                    | 1735   | *    |
| Yemen      | 2007-2009  | Hypertension and Diabetes in Yemen (HYDY)                                        | National                     | both                 | 18-70                                 | 18-70  | 4690                                    | 4828   | *    |
| Yemen      | 2013       | DHS                                                                              | National                     | both                 |                                       | 18-49  |                                         | 18900  | †    |
| Zambia     | 1992       | DHS                                                                              | National                     | both                 |                                       | 20-49  |                                         | 2829   | †    |
| Zambia     | 1996       | DHS                                                                              | National                     | both                 |                                       | 20-49  |                                         | 3485   | †    |
| Zambia     | 2001-2002  | DHS                                                                              | National                     | both                 |                                       | 18-49  |                                         | 5800   | †    |
| Zambia     | 2003       | Kelly et al., Am J Clin Nut 88(4):1010-17, 2008                                  | Community                    | urban                | 18-74                                 | 18-84  | 132                                     | 217    | *    |
| Zambia     | 2007       | DHS                                                                              | National                     | both                 |                                       | 18-49  |                                         | 5456   | †    |
| Zambia     | 2008       | STEPS                                                                            | Subnational                  | urban                | 25+                                   | 25+    | 626                                     | 1214   | †    |
| Zambia     | 2013-2014  | DHS                                                                              | National                     | both                 |                                       | 18-49  |                                         | 12813  | †    |
| Zambia     | 2017       | STEPS                                                                            | National                     | both                 | 18-69                                 | 18-69  | 1565                                    | 2439   | †    |
| Zimbabwe   | 1985-1986  | INTERSALT                                                                        | Community                    | urban                | 20-59                                 | 20-59  | 100                                     | 95     | †    |
| Zimbabwe   | 1991       | Zinyowera et al., Cent Afr J Med 40(2):33-8, 1994                                | Community                    | both                 | 18+                                   | 18+    | 775                                     | 734    | *    |
| Zimbabwe   | 1994       | DHS                                                                              | National                     | both                 |                                       | 20-49  |                                         | 1776   | †    |
| Zimbabwe   | 1995       | Mufunda et al., J Hum Hypertens 14(1):65-73, 2000                                | Community                    | urban                | 25+                                   | 25+    | 384                                     | 391    | *    |
| Zimbabwe   | 1999       | DHS                                                                              | National                     | both                 |                                       | 18-49  |                                         | 4324   | †    |
| Zimbabwe   | 2005       | STEPS                                                                            | National                     | both                 | 25-64                                 | 25-64  | 569                                     | 1808   | *    |

| Country  | Data years | Survey/study name/citation | Level of representative-ness | Rural, urban or both | Age range as used for global analysis |        | Sample size as used for global analysis |        | Note |
|----------|------------|----------------------------|------------------------------|----------------------|---------------------------------------|--------|-----------------------------------------|--------|------|
|          |            |                            |                              |                      | Male                                  | Female | Male                                    | Female |      |
| Zimbabwe | 2005-2006  | DHS                        | National                     | both                 |                                       | 18-49  |                                         | 7017   | †    |
| Zimbabwe | 2010-2011  | DHS                        | National                     | both                 | 18-54                                 | 18-49  | 6284                                    | 7216   | †    |
| Zimbabwe | 2015       | DHS                        | National                     | both                 | 18-54                                 | 18-49  | 7087                                    | 8093   | †    |

\* Data should be requested from study investigators.

† Data available from [www.ncdrisc.org](http://www.ncdrisc.org).

1. National studies for the 3 years prior to 1985 were assigned to 1985 so that they can inform the estimates in countries with slightly earlier national data.

2. The bibliographic citation for this data source is: Pelaez, Martha, Alberto Palloni, Cecilia Albala, Juan C. Alfonso, Roberto Ham-Chande, Anselm Hennis, Maria Lucia Lebrao, Esther Lesn-Diaz, Edith Pantelides, and Omar Prats. SABE - SURVEY ON HEALTH, WELL-BEING, AND AGING IN LATIN AMERICA AND THE CARIBBEAN, 2000 [Computer file]. ICPSR version. Washington, D.C.: Pan American Health Organization/World Health Organization (PAHO/WHO) [producers], 2004. Ann Arbor, MI: Inter-university Consortium for Political and Social Research [distributor], 2005.

3. This research uses data from China Health and Nutrition Survey (CHNS). We thank the National Institute of Nutrition and Food Safety, China Center for Disease Control and Prevention, Carolina Population Center (5 R24 HD050924), the University of North Carolina at Chapel Hill, the NIH (R01-HD30880, DK056350, R24HD050924, and R01-HD38700) and the Fogarty International Center, NIH for financial support for the CHNS data collection and analysis files from 1989 to 2011 and future surveys, and the China-Japan Friendship Hospital, Ministry of Health for support for CHNS 2009.

4. The Longitudinal Aging Study Amsterdam is supported by a grant from the Netherlands Ministry of Health Welfare and Sports, Directorate of Long-Term Care.

5. The bibliographic citation for this data source is: Palloni, Alberto, Ana Luisa Davila, and Melba Sanchez-Ayendez. Puerto Rican Elderly: Health Conditions (PREHCO) Project, 2002-2003, 2006-2007. ICPSR34596-v1. Ann Arbor, MI: Inter-university Consortium for Political and Social Research[distributor], 2013-09-13. doi:10.3886/ICPSR34596.v1.

6. We thank Prof Stephen Fortmann for data from the Stanford Five-City Project.

7. This research uses data from Add Health, a program project designed by J. Richard Udry, Peter S. Bearman, and Kathleen Mullan Harris, and funded by a grant P01-HD31921 from the Eunice Kennedy Shriver National Institute of Child Health and Human Development, with cooperative funding from 17 other agencies. Special acknowledgment is due Ronald R. Rindfuss and Barbara Entwisle for assistance in the original design. Persons interested in obtaining data files from Add Health should contact Add Health, Carolina Population Center, 123 W. Franklin Street, Chapel Hill, NC 27516-2524 ([addhealth@unc.edu](mailto:addhealth@unc.edu)). No direct support was received from grant P01-HD31921 for this analysis.

8. The bibliographic citation for this data source is: Sutton-Tyrrell, Kim, Faith Selzer, MaryFran Sowers, Robert Neer, Lynda Powell, Ellen Gold, Gail Greendale, Gerson Weiss, Karen Matthews, and Sonja McKinlay. Study of Women's Health Across the Nation (SWAN), 1996-1997: Baseline Dataset. ICPSR28762-v2. Ann Arbor, MI: Inter-university Consortium for Political and Social Research[distributor], 2014-02-04. <http://doi.org/10.3886/ICPSR28762.v2>.

9. The bibliographic citation for this data source is: Waite, Linda J., Kathleen Cagney, William Dale, Elbert Huang, Edward O. Laumann, Martha McClintock, Colm A. O'Muircheartaigh, L. Phillip Schumm, and Benjamin Cornwell. National Social Life, Health, and Aging Project (NSHAP): Wave 2 and Partner Data Collection. ICPSR34921-v1. Ann Arbor, MI: Inter-university Consortium for Political and Social Research [distributor], 2014-04-29. <https://doi.org/10.3886/ICPSR34921.v1>.

10. We thank Jelena Jakovljevic, Henrique Loyola, Harry Rutter, Joop van Raaij, Stephen Whiting and Ivo Rakovac for data from the COSI Project.

11. The Older Persons in Jamaica Study was funded by the National Health Fund, Jamaica.

12. The British Women's Heart and Health Study is supported by the British Heart Foundation (PG/13/66/30442). British Women's Heart and Health Study data are available to bona fide researchers for research purposes. Please refer to the BWHHS data sharing policy at <http://www.ucl.ac.uk/british-womens-heart-health-study>.



**Supplementary Table 2.** List of analysis regions and super-regions, and countries in each region.

| Super-region                                           | Region                                                                                                                                                                                                                                                                    |
|--------------------------------------------------------|---------------------------------------------------------------------------------------------------------------------------------------------------------------------------------------------------------------------------------------------------------------------------|
| <b>Sub-Saharan Africa (48)</b>                         | <b>Central Africa (6):</b> Angola, Central African Republic, Congo, DR Congo, Equatorial Guinea, Gabon                                                                                                                                                                    |
|                                                        | <b>East Africa (17):</b> Burundi, Comoros, Djibouti, Eritrea, Ethiopia, Kenya, Madagascar, Malawi, Mauritius, Mozambique, Rwanda, Seychelles, Somalia, Sudan (former), Tanzania, Uganda, Zambia                                                                           |
|                                                        | <b>Southern Africa (6):</b> Botswana, Lesotho, Namibia, South Africa, Swaziland, Zimbabwe                                                                                                                                                                                 |
|                                                        | <b>West Africa (19):</b> Benin, Burkina Faso, Cabo Verde, Cameroon, Chad, Cote d'Ivoire, Gambia, Ghana, Guinea, Guinea Bissau, Liberia, Mali, Mauritania, Niger, Nigeria, Sao Tome and Principe, Senegal, Sierra Leone, Togo                                              |
| <b>Central Asia, Middle East and north Africa (28)</b> | <b>Central Asia (9):</b> Armenia, Azerbaijan, Georgia, Kazakhstan, Kyrgyzstan, Mongolia, Tajikistan, Turkmenistan, Uzbekistan                                                                                                                                             |
|                                                        | <b>Middle East and north Africa (19):</b> Algeria, Bahrain, Egypt, Iran, Iraq, Jordan, Kuwait, Lebanon, Libya, Morocco, Occupied Palestinian Territory, Oman, Qatar, Saudi Arabia, Syrian Arab Republic, Tunisia, Turkey, United Arab Emirates, Yemen                     |
| <b>South Asia (6)</b>                                  | <b>South Asia (6):</b> Afghanistan, Bangladesh, Bhutan, India, Nepal, Pakistan                                                                                                                                                                                            |
| <b>East and southeast Asia (16)</b>                    | <b>East Asia (4):</b> China, China (Hong Kong SAR), North Korea, Taiwan                                                                                                                                                                                                   |
|                                                        | <b>Southeast Asia (12):</b> Brunei Darussalam, Cambodia, Indonesia, Lao PDR, Malaysia, Maldives, Myanmar, Philippines, Sri Lanka, Thailand, Timor-Leste, Viet Nam                                                                                                         |
| <b>Oceania (17)</b>                                    | <b>Polynesia and Micronesia (13):</b> American Samoa, Cook Islands, French Polynesia, Kiribati, Marshall Islands, Micronesia (Federated States of), Nauru, Niue, Palau, Samoa, Tokelau, Tonga, Tuvalu                                                                     |
|                                                        | <b>Melanesia (4):</b> Fiji, Papua New Guinea, Solomon Islands, Vanuatu                                                                                                                                                                                                    |
| <b>High-income Asia Pacific (3)</b>                    | <b>High-income Asia Pacific (3):</b> Japan, Singapore, South Korea                                                                                                                                                                                                        |
| <b>Latin America and the Caribbean (35)</b>            | <b>Andean Latin America (3):</b> Bolivia, Ecuador, Peru                                                                                                                                                                                                                   |
|                                                        | <b>The Caribbean (18):</b> Antigua and Barbuda, Bahamas, Barbados, Belize, Bermuda, Cuba, Dominica, Dominican Republic, Grenada, Guyana, Haiti, Jamaica, Puerto Rico, Saint Kitts and Nevis, Saint Lucia, Saint Vincent and the Grenadines, Suriname, Trinidad and Tobago |
|                                                        | <b>Central Latin America (9):</b> Colombia, Costa Rica, El Salvador, Guatemala, Honduras, Mexico, Nicaragua, Panama, Venezuela                                                                                                                                            |
|                                                        | <b>Southern Latin America (5):</b> Argentina, Brazil, Chile, Paraguay, Uruguay                                                                                                                                                                                            |
| <b>High-income western (27)</b>                        | <b>High-income English-speaking countries* (6):</b> Australia, Canada, Ireland, New Zealand, United Kingdom, United States of America                                                                                                                                     |
|                                                        | <b>Northwestern Europe (12):</b> Austria, Belgium, Denmark, Finland, Germany, Greenland, Iceland, Luxembourg, Netherlands, Norway, Sweden, Switzerland                                                                                                                    |
|                                                        | <b>Southwestern Europe (9):</b> Andorra, Cyprus, France, Greece, Israel, Italy, Malta, Portugal, Spain                                                                                                                                                                    |
| <b>Central and eastern Europe (20)</b>                 | <b>Central Europe (13):</b> Albania, Bosnia and Herzegovina, Bulgaria, Croatia, Czech Republic, Hungary, Macedonia (TFYR), Montenegro, Poland, Romania, Serbia, Slovakia, Slovenia                                                                                        |
|                                                        | <b>Eastern Europe (7):</b> Belarus, Estonia, Latvia, Lithuania, Moldova, Russian Federation, Ukraine                                                                                                                                                                      |

\*Although high-income English-speaking countries are geographically separated, they exhibit remarkably similar trends in cardiometabolic risk factors and outcomes.<sup>5,17-19</sup> They were therefore grouped together so that the statistical model shares information amongst them more than it does with other countries that are geographically closer but epidemiologically more distinct.

We did not have data on population by age group for American Samoa, Bermuda, Greenland, and Tokelau. Country-specific estimates were made but were not used in calculation of regional and global means because the latter requires weighting by age-specific population.

**Supplementary Table 3.** Age-standardised national, rural and urban mean body-mass index (BMI) in 1985 and 2017.

| Country             | Sex   | Age-standardised mean BMI in 1985 (kg/m <sup>2</sup> ) |                  |                  | Age-standardised mean BMI in 2017 (kg/m <sup>2</sup> ) |                  |                  |
|---------------------|-------|--------------------------------------------------------|------------------|------------------|--------------------------------------------------------|------------------|------------------|
|                     |       | National                                               | Rural            | Urban            | National                                               | Rural            | Urban            |
| Afghanistan         | Men   | 20.2 (17.8-22.7)                                       | 19.7 (17.2-22.2) | 22.4 (20.0-25.0) | 22.8 (20.3-25.3)                                       | 22.5 (20.0-25.0) | 23.6 (21.0-26.1) |
|                     | Women | 20.6 (18.4-22.8)                                       | 20.1 (17.8-22.4) | 23.2 (20.9-25.4) | 24.4 (23.3-25.4)                                       | 23.6 (22.5-24.8) | 26.3 (25.1-27.4) |
| Albania             | Men   | 25.2 (23.9-26.5)                                       | 25.0 (23.7-26.4) | 25.4 (24.0-26.7) | 27.0 (26.0-27.9)                                       | 26.9 (25.9-27.9) | 27.0 (26.0-28.0) |
|                     | Women | 26.0 (24.1-27.9)                                       | 26.1 (24.1-28.1) | 25.9 (23.9-27.8) | 26.0 (24.8-27.2)                                       | 26.2 (24.8-27.5) | 25.9 (24.6-27.2) |
| Algeria             | Men   | 22.1 (20.8-23.3)                                       | 21.8 (20.5-23.1) | 22.3 (21.0-23.6) | 25.1 (24.5-25.7)                                       | 24.8 (24.1-25.4) | 25.2 (24.6-25.9) |
|                     | Women | 24.0 (22.2-25.7)                                       | 23.3 (21.4-25.1) | 24.8 (22.9-26.6) | 27.4 (26.7-28.0)                                       | 27.0 (26.3-27.8) | 27.5 (26.7-28.2) |
| American Samoa      | Men   | 33.7 (32.7-34.7)                                       | 32.6 (31.7-33.5) | 34.0 (32.9-35.1) | 34.3 (33.0-35.6)                                       | 34.6 (33.1-35.9) | 34.2 (32.9-35.6) |
|                     | Women | 34.3 (33.1-35.6)                                       | 34.1 (33.0-35.2) | 34.4 (33.0-35.8) | 35.3 (33.7-36.9)                                       | 35.0 (33.1-36.9) | 35.4 (33.7-37.1) |
| Andorra             | Men   | 25.0 (22.5-27.4)                                       | 25.3 (22.8-27.7) | 25.0 (22.5-27.4) | 26.8 (24.4-29.2)                                       | 26.8 (24.3-29.2) | 26.8 (24.3-29.3) |
|                     | Women | 25.2 (22.0-28.4)                                       | 25.4 (22.2-28.7) | 25.2 (22.0-28.4) | 25.3 (22.1-28.6)                                       | 25.2 (21.9-28.5) | 25.3 (22.1-28.6) |
| Angola              | Men   | 20.5 (17.9-23.1)                                       | 20.2 (17.6-22.9) | 21.4 (18.8-24.0) | 22.6 (20.0-25.1)                                       | 22.0 (19.4-24.6) | 23.2 (20.6-25.9) |
|                     | Women | 21.3 (18.0-24.6)                                       | 20.9 (17.6-24.3) | 22.7 (19.3-26.0) | 24.4 (21.2-27.7)                                       | 23.3 (20.0-26.7) | 25.7 (22.4-29.1) |
| Antigua and Barbuda | Men   | 23.6 (21.2-26.0)                                       | 23.2 (20.8-25.7) | 24.2 (21.8-26.8) | 26.2 (23.8-28.6)                                       | 26.0 (23.6-28.4) | 26.7 (24.3-29.2) |
|                     | Women | 24.5 (21.3-27.6)                                       | 24.0 (20.8-27.3) | 25.4 (22.1-28.6) | 28.1 (25.1-31.3)                                       | 28.0 (24.9-31.3) | 28.5 (25.3-31.8) |
| Argentina           | Men   | 25.2 (24.2-26.3)                                       | 24.3 (23.0-25.7) | 25.4 (24.3-26.4) | 27.8 (26.9-28.7)                                       | 26.9 (25.8-28.1) | 27.9 (27.0-28.8) |
|                     | Women | 24.3 (23.0-25.7)                                       | 23.3 (21.5-25.2) | 24.5 (23.2-25.9) | 27.3 (26.1-28.4)                                       | 27.0 (25.5-28.5) | 27.3 (26.1-28.5) |
| Armenia             | Men   | 23.4 (22.0-24.8)                                       | 22.8 (21.4-24.3) | 23.7 (22.2-25.1) | 25.7 (24.9-26.3)                                       | 25.3 (24.5-26.2) | 25.8 (25.1-26.6) |
|                     | Women | 25.4 (23.7-27.1)                                       | 25.2 (23.5-27.0) | 25.5 (23.8-27.3) | 27.1 (26.4-27.7)                                       | 27.5 (26.8-28.3) | 26.8 (26.1-27.5) |
| Australia           | Men   | 25.3 (24.8-25.8)                                       | 25.6 (24.9-26.3) | 25.3 (24.8-25.8) | 27.5 (27.0-28.1)                                       | 27.9 (27.4-28.5) | 27.5 (27.0-28.1) |
|                     | Women | 24.5 (23.9-25.1)                                       | 24.7 (23.8-25.6) | 24.4 (23.8-25.0) | 26.7 (26.0-27.3)                                       | 27.3 (26.6-27.9) | 26.6 (26.0-27.3) |
| Austria             | Men   | 24.4 (23.8-24.9)                                       | 24.7 (23.9-25.5) | 24.2 (23.5-24.8) | 26.7 (26.1-27.4)                                       | 27.0 (26.2-27.8) | 26.6 (25.9-27.3) |
|                     | Women | 23.7 (22.5-24.7)                                       | 24.3 (22.9-25.6) | 23.3 (22.1-24.5) | 24.0 (22.9-25.1)                                       | 24.5 (23.2-25.8) | 23.7 (22.6-24.9) |
| Azerbaijan          | Men   | 24.0 (22.8-25.2)                                       | 23.6 (22.3-24.9) | 24.3 (23.1-25.6) | 26.2 (25.6-26.8)                                       | 26.0 (25.4-26.6) | 26.4 (25.8-27.0) |
|                     | Women | 25.2 (23.5-26.8)                                       | 24.2 (22.5-25.9) | 26.0 (24.3-27.7) | 27.4 (26.7-28.1)                                       | 26.9 (26.1-27.7) | 27.7 (26.9-28.5) |
| Bahamas             | Men   | 24.1 (21.7-26.5)                                       | 23.3 (20.8-25.7) | 24.3 (21.8-26.7) | 26.7 (24.3-29.0)                                       | 26.1 (23.6-28.5) | 26.8 (24.4-29.2) |
|                     | Women | 25.1 (21.9-28.3)                                       | 24.0 (20.8-27.3) | 25.4 (22.1-28.6) | 28.4 (25.3-31.5)                                       | 28.0 (24.8-31.2) | 28.5 (25.3-31.6) |
| Bahrain             | Men   | 24.3 (23.2-25.4)                                       | 23.7 (22.4-25.1) | 24.4 (23.3-25.5) | 27.7 (26.6-28.8)                                       | 27.0 (25.7-28.3) | 27.7 (26.7-28.9) |
|                     | Women | 25.4 (23.9-26.8)                                       | 24.0 (22.1-25.8) | 25.6 (24.1-27.1) | 28.9 (27.5-30.4)                                       | 28.4 (26.6-30.2) | 29.0 (27.6-30.5) |
| Bangladesh          | Men   | 19.4 (18.3-20.5)                                       | 18.8 (17.7-20.0) | 21.8 (20.6-23.1) | 21.6 (21.0-22.2)                                       | 21.1 (20.5-21.7) | 22.4 (21.7-23.2) |
|                     | Women | 18.2 (16.9-19.7)                                       | 17.7 (16.3-19.2) | 20.6 (19.2-22.1) | 22.5 (21.9-23.1)                                       | 21.7 (21.1-22.4) | 23.9 (23.2-24.6) |
| Barbados            | Men   | 24.2 (23.3-25.1)                                       | 24.1 (23.0-25.1) | 24.5 (23.4-25.6) | 26.5 (25.5-27.4)                                       | 26.4 (25.4-27.5) | 26.5 (25.5-27.5) |
|                     | Women | 27.1 (25.9-28.3)                                       | 26.8 (25.5-28.0) | 27.7 (26.3-29.0) | 29.4 (28.2-30.6)                                       | 29.5 (28.2-30.7) | 29.3 (28.0-30.5) |
| Belarus             | Men   | 24.7 (23.2-26.3)                                       | 24.7 (23.0-26.4) | 24.7 (23.1-26.4) | 26.5 (25.8-27.2)                                       | 26.2 (25.4-26.9) | 26.6 (25.9-27.4) |
|                     | Women | 26.2 (23.8-28.4)                                       | 26.7 (24.2-29.1) | 25.8 (23.4-28.1) | 26.4 (25.6-27.2)                                       | 27.3 (26.5-28.2) | 26.1 (25.2-26.9) |
| Belgium             | Men   | 24.8 (24.3-25.2)                                       | 25.0 (24.4-25.5) | 24.8 (24.3-25.2) | 26.4 (25.7-27.1)                                       | 26.4 (25.6-27.2) | 26.4 (25.7-27.1) |
|                     | Women | 24.8 (24.2-25.3)                                       | 25.1 (24.4-25.7) | 24.8 (24.2-25.3) | 25.4 (24.5-26.3)                                       | 25.3 (24.2-26.4) | 25.4 (24.5-26.4) |
| Belize              | Men   | 24.9 (23.4-26.3)                                       | 24.4 (22.8-26.0) | 25.4 (23.9-27.0) | 27.6 (26.3-28.8)                                       | 27.3 (25.9-28.6) | 27.9 (26.6-29.3) |
|                     | Women | 26.8 (24.8-28.7)                                       | 26.2 (24.1-28.2) | 27.5 (25.4-29.5) | 30.5 (29.0-32.0)                                       | 30.4 (28.6-32.1) | 30.8 (29.0-32.5) |
| Benin               | Men   | 20.7 (19.4-22.1)                                       | 20.3 (18.9-21.7) | 21.7 (20.3-23.1) | 22.7 (22.0-23.3)                                       | 22.1 (21.3-22.8) | 23.4 (22.7-24.1) |
|                     | Women | 20.6 (19.1-22.0)                                       | 20.1 (18.5-21.6) | 21.8 (20.3-23.3) | 24.3 (23.5-25.0)                                       | 23.2 (22.5-24.0) | 25.5 (24.7-26.3) |
| Bermuda             | Men   | 24.3 (21.8-26.8)                                       | na*              | 24.3 (21.8-26.8) | 26.7 (24.3-29.2)                                       | na*              | 26.7 (24.3-29.2) |
|                     | Women | 25.4 (22.2-28.6)                                       | na*              | 25.4 (22.2-28.6) | 28.5 (25.3-31.6)                                       | na*              | 28.5 (25.3-31.6) |
| Bhutan              | Men   | 20.6 (19.1-22.1)                                       | 20.3 (18.7-21.8) | 23.1 (21.5-24.6) | 23.5 (22.8-24.3)                                       | 23.1 (22.2-23.9) | 24.2 (23.3-25.2) |
|                     | Women | 20.7 (18.4-22.9)                                       | 20.3 (18.0-22.6) | 23.0 (20.8-25.3) | 24.6 (23.7-25.5)                                       | 23.8 (22.7-24.9) | 25.9 (24.7-27.0) |

| Country                  | Sex   | Age-standardised mean BMI in 1985 (kg/m <sup>2</sup> ) |                  |                  | Age-standardised mean BMI in 2017 (kg/m <sup>2</sup> ) |                  |                  |
|--------------------------|-------|--------------------------------------------------------|------------------|------------------|--------------------------------------------------------|------------------|------------------|
|                          |       | National                                               | Rural            | Urban            | National                                               | Rural            | Urban            |
| Bolivia                  | Men   | 23.3 (21.0-25.5)                                       | 22.9 (20.6-25.2) | 23.6 (21.3-25.9) | 26.1 (23.9-28.4)                                       | 25.3 (23.1-27.5) | 26.5 (24.2-28.8) |
|                          | Women | 23.8 (22.3-25.3)                                       | 23.0 (21.4-24.5) | 24.6 (23.1-26.1) | 27.9 (26.5-29.3)                                       | 27.0 (25.6-28.5) | 28.3 (26.8-29.7) |
| Bosnia and Herzegovina   | Men   | 24.9 (23.5-26.2)                                       | 24.8 (23.4-26.2) | 25.0 (23.6-26.4) | 26.8 (25.7-27.8)                                       | 26.7 (25.7-27.8) | 26.8 (25.7-27.9) |
|                          | Women | 25.5 (23.5-27.4)                                       | 25.7 (23.7-27.7) | 25.1 (23.1-27.0) | 25.7 (24.4-27.1)                                       | 26.0 (24.6-27.5) | 25.3 (23.9-26.8) |
| Botswana                 | Men   | 20.6 (19.2-22.0)                                       | 20.3 (18.8-21.7) | 21.4 (20.0-22.9) | 22.6 (21.9-23.4)                                       | 21.9 (20.9-22.8) | 23.2 (22.3-24.0) |
|                          | Women | 24.2 (22.2-26.2)                                       | 23.7 (21.5-25.8) | 25.6 (23.5-27.7) | 26.2 (25.3-27.1)                                       | 25.0 (23.8-26.2) | 27.0 (26.0-28.2) |
| Brazil                   | Men   | 23.3 (22.5-24.0)                                       | 22.2 (21.4-23.0) | 23.7 (22.9-24.5) | 26.2 (25.7-26.7)                                       | 25.0 (24.3-25.6) | 26.4 (25.9-26.9) |
|                          | Women | 24.0 (23.2-25.0)                                       | 23.1 (22.1-24.1) | 24.4 (23.5-25.4) | 26.9 (26.2-27.5)                                       | 26.4 (25.7-27.2) | 26.9 (26.3-27.6) |
| Brunei Darussalam        | Men   | 24.0 (22.5-25.4)                                       | 23.7 (22.1-25.1) | 24.2 (22.7-25.7) | 27.1 (26.4-27.7)                                       | 26.6 (26.0-27.3) | 27.2 (26.5-27.9) |
|                          | Women | 23.6 (21.4-25.6)                                       | 22.9 (20.7-25.0) | 24.0 (21.8-26.1) | 27.4 (26.6-28.1)                                       | 27.0 (26.1-27.8) | 27.5 (26.7-28.2) |
| Bulgaria                 | Men   | 25.0 (23.8-26.4)                                       | 24.9 (23.5-26.4) | 25.1 (23.8-26.5) | 27.0 (25.8-28.1)                                       | 27.0 (25.7-28.3) | 27.0 (25.7-28.2) |
|                          | Women | 25.2 (23.4-27.1)                                       | 25.5 (23.4-27.6) | 25.0 (23.1-26.9) | 25.6 (24.1-27.1)                                       | 26.0 (24.2-27.8) | 25.5 (23.9-27.1) |
| Burkina Faso             | Men   | 20.2 (18.8-21.5)                                       | 20.0 (18.6-21.4) | 21.4 (19.9-22.9) | 22.2 (21.4-23.0)                                       | 21.8 (21.0-22.6) | 23.1 (22.1-24.1) |
|                          | Women | 19.9 (18.7-21.2)                                       | 19.6 (18.4-20.9) | 22.0 (20.7-23.3) | 22.2 (21.4-23.1)                                       | 21.1 (20.2-22.0) | 24.7 (23.7-25.7) |
| Burundi                  | Men   | 20.2 (17.7-22.6)                                       | 20.1 (17.6-22.5) | 21.2 (18.7-23.6) | 22.1 (19.8-24.5)                                       | 22.0 (19.6-24.3) | 23.2 (20.8-25.6) |
|                          | Women | 19.6 (17.5-21.7)                                       | 19.5 (17.4-21.6) | 21.7 (19.5-23.8) | 21.1 (20.3-22.0)                                       | 20.7 (19.8-21.6) | 24.0 (23.0-24.9) |
| Cabo Verde               | Men   | 21.4 (20.0-22.8)                                       | 20.9 (19.4-22.4) | 22.3 (20.9-23.8) | 23.6 (22.6-24.7)                                       | 22.7 (21.6-23.9) | 24.1 (23.0-25.2) |
|                          | Women | 22.2 (20.4-24.2)                                       | 21.8 (19.8-23.7) | 23.3 (21.3-25.2) | 25.6 (24.2-27.0)                                       | 24.2 (22.7-25.7) | 26.3 (24.8-27.8) |
| Cambodia                 | Men   | 19.8 (18.4-21.2)                                       | 19.7 (18.3-21.1) | 20.6 (19.1-22.1) | 22.1 (21.2-23.1)                                       | 21.9 (21.0-22.9) | 22.9 (21.7-24.1) |
|                          | Women | 19.2 (17.6-20.9)                                       | 19.0 (17.4-20.7) | 20.4 (18.7-22.1) | 22.5 (21.7-23.3)                                       | 22.3 (21.4-23.1) | 23.2 (22.3-24.1) |
| Cameroon                 | Men   | 21.6 (20.3-23.0)                                       | 21.2 (19.7-22.6) | 22.5 (21.2-23.8) | 23.5 (22.6-24.4)                                       | 22.9 (21.9-23.9) | 24.1 (23.1-25.0) |
|                          | Women | 22.0 (20.5-23.5)                                       | 21.1 (19.5-22.7) | 23.5 (22.0-25.1) | 24.8 (23.9-25.7)                                       | 23.1 (22.1-24.0) | 26.2 (25.3-27.2) |
| Canada                   | Men   | 25.4 (24.8-26.0)                                       | 25.6 (24.9-26.3) | 25.4 (24.7-26.0) | 27.4 (26.8-28.0)                                       | 27.6 (26.8-28.3) | 27.4 (26.8-27.9) |
|                          | Women | 24.5 (23.7-25.2)                                       | 24.9 (24.0-25.8) | 24.3 (23.5-25.1) | 26.7 (26.0-27.4)                                       | 27.0 (26.0-28.0) | 26.6 (25.9-27.3) |
| Central African Republic | Men   | 20.0 (18.4-21.6)                                       | 19.6 (17.8-21.3) | 20.8 (19.0-22.5) | 21.8 (20.5-23.1)                                       | 21.3 (19.9-22.7) | 22.5 (21.0-24.0) |
|                          | Women | 20.5 (19.0-22.0)                                       | 20.1 (18.6-21.7) | 21.3 (19.7-22.9) | 23.3 (21.7-24.9)                                       | 22.6 (20.8-24.3) | 24.5 (22.8-26.2) |
| Chad                     | Men   | 20.4 (18.5-22.2)                                       | 20.1 (18.2-22.0) | 21.4 (19.6-23.2) | 22.2 (20.6-23.9)                                       | 22.0 (20.2-23.7) | 23.1 (21.5-24.7) |
|                          | Women | 19.6 (18.1-21.2)                                       | 19.3 (17.7-20.8) | 21.1 (19.4-22.6) | 21.8 (20.9-22.7)                                       | 21.2 (20.3-22.2) | 23.9 (23.0-24.9) |
| Chile                    | Men   | 25.3 (24.2-26.3)                                       | 24.9 (23.7-26.1) | 25.3 (24.2-26.4) | 28.1 (27.5-28.7)                                       | 27.8 (27.2-28.5) | 28.1 (27.5-28.7) |
|                          | Women | 25.8 (24.2-27.4)                                       | 25.3 (23.5-27.1) | 25.9 (24.2-27.5) | 28.8 (28.1-29.5)                                       | 29.4 (28.6-30.2) | 28.8 (28.0-29.5) |
| China                    | Men   | 21.1 (20.8-21.5)                                       | 20.9 (20.5-21.3) | 22.0 (21.6-22.4) | 24.4 (23.9-24.9)                                       | 23.9 (23.4-24.4) | 24.7 (24.2-25.3) |
|                          | Women | 21.4 (21.0-21.8)                                       | 21.2 (20.7-21.6) | 22.2 (21.7-22.7) | 23.6 (23.0-24.3)                                       | 23.4 (22.8-24.1) | 23.7 (23.1-24.4) |
| China (Hong Kong SAR)    | Men   | 22.4 (21.4-23.3)                                       | 21.5 (20.2-22.8) | 22.4 (21.5-23.4) | 24.8 (23.6-26.1)                                       | na*              | 24.8 (23.6-26.1) |
|                          | Women | 22.0 (20.8-23.2)                                       | 21.2 (19.4-23.0) | 22.1 (20.8-23.3) | 24.2 (22.2-26.2)                                       | na*              | 24.2 (22.2-26.2) |
| Colombia                 | Men   | 22.8 (21.7-23.9)                                       | 22.0 (20.9-23.2) | 23.2 (22.0-24.4) | 25.7 (25.0-26.4)                                       | 24.8 (24.0-25.5) | 26.0 (25.2-26.7) |
|                          | Women | 23.8 (22.5-25.0)                                       | 23.3 (22.0-24.5) | 24.0 (22.7-25.4) | 26.7 (25.8-27.7)                                       | 26.6 (25.6-27.5) | 26.7 (25.8-27.7) |
| Comoros                  | Men   | 21.3 (19.9-22.7)                                       | 21.0 (19.5-22.5) | 22.1 (20.5-23.6) | 23.3 (22.4-24.2)                                       | 22.9 (22.0-23.9) | 24.2 (23.1-25.3) |
|                          | Women | 21.3 (19.7-22.9)                                       | 21.0 (19.3-22.6) | 22.2 (20.5-23.9) | 25.5 (24.6-26.4)                                       | 25.0 (24.0-25.9) | 26.9 (25.9-28.0) |
| Congo                    | Men   | 20.6 (19.3-21.9)                                       | 19.9 (18.3-21.5) | 21.1 (19.8-22.4) | 22.4 (20.9-23.8)                                       | 21.6 (19.9-23.3) | 22.8 (21.3-24.2) |
|                          | Women | 21.7 (20.8-22.5)                                       | 20.6 (19.8-21.5) | 22.6 (21.5-23.7) | 24.2 (23.1-25.2)                                       | 22.5 (21.4-23.6) | 25.0 (23.9-26.1) |
| Cook Islands             | Men   | 30.4 (29.0-31.8)                                       | 29.3 (27.7-31.0) | 31.2 (29.7-32.7) | 32.6 (31.7-33.5)                                       | 32.4 (31.2-33.6) | 32.6 (31.6-33.6) |
|                          | Women | 31.1 (29.2-32.9)                                       | 30.5 (28.3-32.6) | 31.6 (29.6-33.5) | 33.1 (32.0-34.2)                                       | 32.4 (30.8-34.0) | 33.4 (32.2-34.6) |
| Costa Rica               | Men   | 24.3 (22.9-25.7)                                       | 24.0 (22.5-25.4) | 24.7 (23.3-26.1) | 26.9 (26.1-27.7)                                       | 26.4 (25.5-27.2) | 27.1 (26.2-27.9) |
|                          | Women | 23.8 (21.9-25.6)                                       | 23.1 (21.2-25.1) | 24.5 (22.6-26.4) | 28.0 (27.1-28.9)                                       | 27.6 (26.7-28.6) | 28.1 (27.2-29.0) |

| Country            | Sex   | Age-standardised mean BMI in 1985 (kg/m <sup>2</sup> ) |                  |                  | Age-standardised mean BMI in 2017 (kg/m <sup>2</sup> ) |                  |                  |
|--------------------|-------|--------------------------------------------------------|------------------|------------------|--------------------------------------------------------|------------------|------------------|
|                    |       | National                                               | Rural            | Urban            | National                                               | Rural            | Urban            |
| Cote d'Ivoire      | Men   | 21.5 (20.0-23.0)                                       | 21.1 (19.5-22.7) | 22.1 (20.5-23.7) | 23.4 (22.1-24.8)                                       | 22.9 (21.5-24.3) | 23.8 (22.4-25.3) |
|                    | Women | 21.5 (20.2-22.9)                                       | 20.7 (19.3-22.2) | 22.9 (21.4-24.3) | 24.2 (23.1-25.2)                                       | 22.7 (21.5-23.8) | 25.4 (24.2-26.5) |
| Croatia            | Men   | 25.4 (24.2-26.5)                                       | 25.1 (23.8-26.4) | 25.6 (24.4-26.8) | 27.6 (26.7-28.5)                                       | 27.4 (26.5-28.2) | 27.7 (26.7-28.8) |
|                    | Women | 25.0 (23.3-26.6)                                       | 25.3 (23.5-27.1) | 24.7 (22.9-26.5) | 26.2 (25.0-27.4)                                       | 26.7 (25.5-27.8) | 25.9 (24.4-27.5) |
| Cuba               | Men   | 22.8 (21.5-24.1)                                       | 22.0 (20.5-23.4) | 23.1 (21.8-24.5) | 25.3 (24.4-26.2)                                       | 24.7 (23.7-25.7) | 25.5 (24.5-26.4) |
|                    | Women | 23.5 (21.7-25.2)                                       | 22.7 (20.7-24.6) | 23.8 (22.0-25.6) | 26.3 (25.1-27.4)                                       | 26.2 (24.9-27.4) | 26.3 (25.2-27.5) |
| Cyprus             | Men   | 25.6 (24.4-26.9)                                       | 25.8 (24.5-27.2) | 25.5 (24.3-26.8) | 27.4 (26.1-28.7)                                       | 27.4 (26.0-28.8) | 27.4 (26.2-28.8) |
|                    | Women | 25.4 (23.8-27.2)                                       | 25.6 (23.7-27.6) | 25.3 (23.6-27.1) | 25.5 (23.7-27.3)                                       | 25.4 (23.4-27.4) | 25.5 (23.7-27.4) |
| Czech Republic     | Men   | 26.4 (25.9-26.9)                                       | 26.6 (25.9-27.3) | 26.3 (25.8-26.9) | 27.9 (27.3-28.5)                                       | 28.2 (27.6-28.9) | 27.8 (27.2-28.4) |
|                    | Women | 26.6 (26.0-27.2)                                       | 27.6 (26.6-28.5) | 26.3 (25.7-27.0) | 26.1 (25.5-26.8)                                       | 26.8 (26.1-27.6) | 25.9 (25.2-26.6) |
| Denmark            | Men   | 24.0 (23.5-24.4)                                       | 24.1 (23.4-24.9) | 23.9 (23.5-24.4) | 26.3 (25.7-26.8)                                       | 26.3 (25.6-27.0) | 26.3 (25.7-26.8) |
|                    | Women | 24.2 (23.3-25.2)                                       | 24.6 (23.2-25.9) | 24.2 (23.2-25.1) | 24.5 (23.5-25.6)                                       | 24.6 (23.5-25.8) | 24.5 (23.5-25.6) |
| Djibouti           | Men   | 21.0 (18.6-23.3)                                       | 20.1 (17.7-22.6) | 21.2 (18.8-23.7) | 23.0 (20.6-25.3)                                       | 22.0 (19.6-24.4) | 23.3 (20.9-25.6) |
|                    | Women | 22.0 (18.9-25.1)                                       | 20.8 (17.7-24.0) | 22.4 (19.2-25.6) | 24.9 (21.7-27.9)                                       | 23.0 (19.8-26.1) | 25.4 (22.2-28.5) |
| Dominica           | Men   | 22.4 (21.0-23.9)                                       | 21.9 (20.2-23.5) | 22.8 (21.4-24.4) | 25.0 (23.8-26.1)                                       | 24.5 (23.2-25.9) | 25.2 (23.9-26.4) |
|                    | Women | 25.4 (23.4-27.4)                                       | 24.7 (22.4-26.9) | 26.1 (24.0-28.2) | 29.1 (27.5-30.5)                                       | 28.7 (27.0-30.5) | 29.2 (27.6-30.8) |
| Dominican Republic | Men   | 23.0 (21.9-24.0)                                       | 22.4 (21.2-23.6) | 23.4 (22.3-24.5) | 26.1 (25.4-26.8)                                       | 25.6 (24.8-26.3) | 26.3 (25.5-27.0) |
|                    | Women | 23.3 (22.3-24.4)                                       | 22.6 (21.4-23.8) | 24.0 (22.8-25.1) | 27.7 (26.8-28.5)                                       | 27.4 (26.5-28.3) | 27.7 (26.9-28.6) |
| DR Congo           | Men   | 19.4 (17.6-21.2)                                       | 19.1 (17.2-21.0) | 20.2 (18.5-22.0) | 21.3 (19.8-22.9)                                       | 20.8 (19.1-22.7) | 22.0 (20.4-23.5) |
|                    | Women | 20.0 (18.2-21.8)                                       | 19.5 (17.7-21.5) | 21.2 (19.3-23.0) | 22.7 (21.8-23.7)                                       | 21.7 (20.7-22.7) | 24.1 (23.1-25.1) |
| Ecuador            | Men   | 23.5 (22.0-24.9)                                       | 23.1 (21.5-24.6) | 24.0 (22.4-25.5) | 26.5 (25.7-27.3)                                       | 25.6 (24.8-26.4) | 27.0 (26.2-27.8) |
|                    | Women | 24.5 (22.6-26.4)                                       | 23.8 (21.8-25.8) | 25.2 (23.2-27.2) | 28.0 (27.0-29.0)                                       | 27.4 (26.4-28.4) | 28.3 (27.3-29.4) |
| Egypt              | Men   | 25.0 (23.7-26.1)                                       | 24.7 (23.4-25.9) | 25.3 (24.1-26.6) | 27.5 (27.1-28.0)                                       | 27.2 (26.7-27.7) | 27.9 (27.4-28.4) |
|                    | Women | 26.6 (25.4-27.7)                                       | 25.4 (24.1-26.6) | 28.1 (26.9-29.3) | 31.7 (31.3-32.2)                                       | 31.3 (30.8-31.9) | 32.3 (31.7-32.8) |
| El Salvador        | Men   | 24.3 (22.5-26.2)                                       | 23.8 (21.9-25.7) | 24.9 (23.1-26.8) | 27.1 (25.4-28.7)                                       | 26.3 (24.5-28.0) | 27.4 (25.8-29.1) |
|                    | Women | 23.9 (22.1-25.7)                                       | 23.2 (21.3-25.1) | 24.8 (22.8-26.6) | 28.5 (27.2-29.8)                                       | 28.0 (26.6-29.4) | 28.7 (27.4-30.1) |
| Equatorial Guinea  | Men   | 20.6 (18.0-23.2)                                       | 20.2 (17.6-22.9) | 21.4 (18.8-24.1) | 22.5 (19.9-25.0)                                       | 22.0 (19.3-24.6) | 23.2 (20.6-25.8) |
|                    | Women | 22.8 (20.4-25.0)                                       | 22.3 (19.9-24.6) | 24.0 (21.5-26.4) | 25.9 (24.6-27.2)                                       | 25.0 (23.5-26.5) | 27.3 (25.7-28.9) |
| Eritrea            | Men   | 19.0 (17.7-20.4)                                       | 18.9 (17.5-20.2) | 20.0 (18.5-21.5) | 20.5 (19.7-21.4)                                       | 20.2 (19.3-21.1) | 21.6 (20.4-22.7) |
|                    | Women | 19.1 (17.7-20.5)                                       | 18.8 (17.4-20.3) | 20.5 (18.8-22.2) | 21.1 (20.0-22.2)                                       | 20.5 (19.3-21.6) | 23.1 (21.5-24.6) |
| Estonia            | Men   | 24.8 (23.9-25.7)                                       | 25.0 (24.0-26.1) | 24.7 (23.7-25.6) | 26.6 (26.0-27.2)                                       | 26.6 (26.0-27.2) | 26.6 (26.0-27.2) |
|                    | Women | 25.3 (24.2-26.5)                                       | 25.8 (24.4-27.1) | 25.1 (23.9-26.4) | 25.7 (25.0-26.4)                                       | 26.2 (25.4-26.9) | 25.5 (24.8-26.2) |
| Ethiopia           | Men   | 18.5 (17.2-20.0)                                       | 18.4 (17.0-19.9) | 19.8 (18.4-21.3) | 20.2 (19.6-20.8)                                       | 19.8 (19.2-20.4) | 21.5 (20.9-22.1) |
|                    | Women | 18.9 (17.2-20.5)                                       | 18.7 (17.0-20.4) | 20.2 (18.5-21.9) | 21.0 (20.2-21.8)                                       | 20.4 (19.6-21.2) | 23.1 (22.3-23.9) |
| Fiji               | Men   | 24.1 (22.7-25.4)                                       | 23.4 (22.0-24.8) | 25.1 (23.6-26.6) | 26.5 (25.7-27.4)                                       | 26.4 (25.4-27.4) | 26.7 (25.7-27.7) |
|                    | Women | 25.8 (23.8-27.9)                                       | 25.5 (23.4-27.6) | 26.4 (24.2-28.6) | 28.8 (27.7-29.9)                                       | 28.3 (27.1-29.5) | 29.2 (28.0-30.4) |
| Finland            | Men   | 25.2 (24.7-25.7)                                       | 25.5 (25.0-26.0) | 25.1 (24.6-25.6) | 26.4 (25.8-27.0)                                       | 26.6 (26.0-27.3) | 26.3 (25.7-26.9) |
|                    | Women | 24.5 (23.8-25.2)                                       | 25.2 (24.3-26.0) | 24.3 (23.6-25.0) | 25.4 (24.6-26.1)                                       | 25.9 (25.0-26.7) | 25.3 (24.5-26.1) |
| France             | Men   | 24.9 (24.3-25.5)                                       | 25.4 (24.6-26.2) | 24.7 (24.1-25.4) | 26.0 (25.1-26.9)                                       | 26.3 (25.3-27.3) | 25.9 (25.0-26.8) |
|                    | Women | 24.2 (23.4-25.0)                                       | 24.6 (23.5-25.8) | 24.0 (23.2-24.9) | 24.0 (22.8-25.2)                                       | 24.2 (22.9-25.5) | 24.0 (22.7-25.1) |
| French Polynesia   | Men   | 28.2 (26.8-29.7)                                       | 27.1 (25.6-28.7) | 29.0 (27.4-30.6) | 29.7 (28.7-30.7)                                       | 29.6 (28.5-30.8) | 29.8 (28.6-30.9) |
|                    | Women | 28.7 (26.6-30.9)                                       | 28.1 (25.8-30.5) | 29.1 (26.9-31.5) | 29.6 (28.3-30.9)                                       | 29.1 (27.5-30.7) | 30.0 (28.5-31.5) |
| Gabon              | Men   | 21.7 (20.0-23.5)                                       | 20.9 (19.0-22.9) | 22.2 (20.4-24.0) | 24.0 (22.6-25.4)                                       | 22.9 (21.2-24.6) | 24.2 (22.8-25.6) |
|                    | Women | 22.5 (20.6-24.3)                                       | 21.3 (19.4-23.2) | 23.2 (21.3-25.1) | 26.8 (25.6-27.9)                                       | 24.4 (23.3-25.7) | 27.1 (25.9-28.3) |

| Country       | Sex   | Age-standardised mean BMI in 1985 (kg/m <sup>2</sup> ) |                  |                  | Age-standardised mean BMI in 2017 (kg/m <sup>2</sup> ) |                  |                  |
|---------------|-------|--------------------------------------------------------|------------------|------------------|--------------------------------------------------------|------------------|------------------|
|               |       | National                                               | Rural            | Urban            | National                                               | Rural            | Urban            |
| Gambia        | Men   | 20.0 (18.8-21.2)                                       | 19.6 (18.3-20.9) | 20.9 (19.6-22.2) | 23.0 (22.0-24.0)                                       | 22.3 (21.2-23.4) | 23.5 (22.4-24.6) |
|               | Women | 20.5 (19.1-22.0)                                       | 19.8 (18.2-21.4) | 22.1 (20.5-23.7) | 24.6 (23.7-25.5)                                       | 22.9 (21.9-23.9) | 25.8 (24.8-26.8) |
| Georgia       | Men   | 24.7 (23.3-26.2)                                       | 24.4 (22.8-25.9) | 25.1 (23.5-26.6) | 27.5 (26.8-28.1)                                       | 27.3 (26.6-28.0) | 27.6 (26.9-28.3) |
|               | Women | 24.3 (22.2-26.4)                                       | 24.0 (21.8-26.1) | 24.5 (22.4-26.7) | 27.6 (26.9-28.3)                                       | 27.9 (27.1-28.8) | 27.3 (26.5-28.2) |
| Germany       | Men   | 25.3 (24.9-25.6)                                       | 25.6 (25.1-26.1) | 25.1 (24.8-25.5) | 27.3 (26.6-28.1)                                       | 27.5 (26.7-28.3) | 27.3 (26.5-28.0) |
|               | Women | 24.6 (24.1-25.1)                                       | 25.2 (24.4-25.9) | 24.4 (23.9-24.9) | 25.6 (24.6-26.7)                                       | 26.0 (24.9-27.1) | 25.5 (24.4-26.6) |
| Ghana         | Men   | 20.8 (19.6-22.1)                                       | 20.2 (18.9-21.5) | 22.1 (20.8-23.5) | 22.8 (22.1-23.4)                                       | 21.7 (21.0-22.4) | 23.6 (22.9-24.3) |
|               | Women | 21.5 (20.2-22.8)                                       | 20.6 (19.3-21.9) | 23.2 (21.9-24.6) | 25.6 (24.8-26.4)                                       | 23.8 (22.9-24.6) | 27.1 (26.3-28.0) |
| Greece        | Men   | 25.5 (24.6-26.5)                                       | 25.6 (24.6-26.7) | 25.5 (24.5-26.5) | 26.9 (26.2-27.6)                                       | 26.7 (25.9-27.5) | 26.9 (26.2-27.6) |
|               | Women | 26.3 (24.9-27.6)                                       | 26.2 (24.7-27.8) | 26.3 (24.8-27.7) | 25.0 (24.2-25.9)                                       | 24.7 (23.6-25.6) | 25.1 (24.3-26.0) |
| Greenland     | Men   | 23.9 (22.6-25.2)                                       | 23.7 (22.4-25.0) | 23.9 (22.6-25.2) | 25.8 (24.8-26.8)                                       | 25.4 (24.4-26.5) | 25.9 (24.8-26.9) |
|               | Women | 25.5 (23.6-27.4)                                       | 26.0 (24.0-28.0) | 25.3 (23.4-27.3) | 26.5 (25.1-27.8)                                       | 26.9 (25.4-28.3) | 26.4 (25.1-27.8) |
| Grenada       | Men   | 22.7 (21.2-24.2)                                       | 22.4 (20.7-24.0) | 23.4 (21.8-25.0) | 25.2 (24.2-26.2)                                       | 25.0 (23.9-26.0) | 25.7 (24.6-26.9) |
|               | Women | 25.0 (22.9-27.1)                                       | 24.6 (22.4-26.8) | 25.9 (23.6-28.1) | 28.8 (27.6-30.1)                                       | 28.7 (27.3-30.0) | 29.1 (27.6-30.6) |
| Guatemala     | Men   | 23.1 (21.8-24.3)                                       | 22.5 (21.1-23.8) | 24.0 (22.7-25.4) | 25.7 (24.7-26.6)                                       | 24.8 (23.9-25.8) | 26.4 (25.5-27.4) |
|               | Women | 23.0 (21.6-24.4)                                       | 22.3 (20.8-23.8) | 24.1 (22.6-25.6) | 27.4 (26.6-28.2)                                       | 26.8 (25.9-27.6) | 27.9 (27.1-28.8) |
| Guinea        | Men   | 20.5 (18.9-22.1)                                       | 20.2 (18.5-21.8) | 21.5 (19.8-23.2) | 22.4 (21.2-23.7)                                       | 21.9 (20.7-23.3) | 23.1 (21.7-24.5) |
|               | Women | 20.9 (19.2-22.5)                                       | 20.3 (18.6-22.0) | 22.5 (20.8-24.3) | 23.5 (22.5-24.6)                                       | 22.4 (21.3-23.5) | 25.5 (24.4-26.6) |
| Guinea Bissau | Men   | 20.7 (18.3-23.1)                                       | 20.4 (17.9-22.8) | 21.7 (19.2-24.1) | 22.8 (20.5-25.2)                                       | 22.2 (19.8-24.7) | 23.4 (21.0-25.8) |
|               | Women | 21.1 (19.1-23.1)                                       | 20.6 (18.5-22.6) | 22.7 (20.6-24.7) | 24.2 (22.9-25.5)                                       | 22.8 (21.4-24.1) | 25.6 (24.2-26.9) |
| Guyana        | Men   | 22.5 (21.1-24.0)                                       | 22.3 (20.7-23.8) | 23.1 (21.6-24.7) | 25.1 (24.0-26.2)                                       | 24.9 (23.8-26.1) | 25.5 (24.3-26.6) |
|               | Women | 23.9 (21.9-26.1)                                       | 23.6 (21.4-25.7) | 24.8 (22.7-27.0) | 27.6 (26.2-29.0)                                       | 27.5 (26.1-29.0) | 27.8 (26.4-29.2) |
| Haiti         | Men   | 23.5 (21.0-25.9)                                       | 23.2 (20.7-25.8) | 24.3 (21.8-26.7) | 26.5 (24.0-28.9)                                       | 26.0 (23.6-28.5) | 26.7 (24.3-29.2) |
|               | Women | 20.0 (18.5-21.4)                                       | 19.4 (17.8-20.9) | 21.8 (20.3-23.4) | 24.6 (23.8-25.3)                                       | 23.5 (22.7-24.3) | 25.2 (24.4-26.0) |
| Honduras      | Men   | 23.5 (21.7-25.3)                                       | 23.1 (21.2-25.0) | 24.2 (22.4-26.0) | 26.2 (24.6-27.8)                                       | 25.5 (23.8-27.3) | 26.6 (25.1-28.2) |
|               | Women | 22.1 (20.5-23.8)                                       | 21.4 (19.7-23.1) | 23.4 (21.7-25.1) | 27.7 (26.7-28.7)                                       | 26.9 (25.9-28.0) | 28.3 (27.3-29.4) |
| Hungary       | Men   | 25.7 (25.0-26.3)                                       | 25.6 (24.7-26.4) | 25.7 (25.0-26.4) | 27.9 (26.7-29.1)                                       | 27.9 (26.5-29.2) | 27.9 (26.6-29.1) |
|               | Women | 25.4 (24.7-26.1)                                       | 25.6 (24.5-26.7) | 25.3 (24.4-26.1) | 25.9 (23.8-28.0)                                       | 26.2 (24.0-28.5) | 25.8 (23.6-28.0) |
| Iceland       | Men   | 24.8 (24.2-25.5)                                       | 25.2 (24.3-26.1) | 24.8 (24.1-25.4) | 27.1 (26.2-27.9)                                       | 27.3 (26.1-28.4) | 27.1 (26.2-27.9) |
|               | Women | 24.3 (23.4-25.2)                                       | 24.9 (23.7-26.1) | 24.3 (23.3-25.2) | 25.5 (24.4-26.7)                                       | 25.9 (24.2-27.5) | 25.5 (24.4-26.7) |
| India         | Men   | 19.6 (19.0-20.3)                                       | 18.9 (18.2-19.6) | 21.9 (21.2-22.7) | 21.9 (21.4-22.3)                                       | 21.5 (21.0-21.9) | 22.6 (22.2-23.1) |
|               | Women | 19.7 (18.9-20.6)                                       | 19.0 (18.1-19.9) | 22.2 (21.3-23.1) | 22.1 (21.6-22.6)                                       | 21.5 (21.0-22.0) | 23.2 (22.7-23.8) |
| Indonesia     | Men   | 20.1 (19.3-20.9)                                       | 19.8 (19.0-20.6) | 20.9 (20.1-21.8) | 22.5 (22.0-23.0)                                       | 21.9 (21.4-22.4) | 23.1 (22.5-23.6) |
|               | Women | 20.5 (19.5-21.5)                                       | 20.0 (19.0-21.1) | 21.9 (20.8-23.0) | 24.0 (23.4-24.6)                                       | 23.3 (22.6-24.0) | 24.5 (23.9-25.2) |
| Iran          | Men   | 22.6 (21.6-23.6)                                       | 22.0 (21.0-23.0) | 23.2 (22.2-24.2) | 25.4 (25.0-25.8)                                       | 24.5 (24.0-24.9) | 25.7 (25.3-26.2) |
|               | Women | 24.2 (22.7-25.6)                                       | 23.1 (21.6-24.6) | 25.1 (23.7-26.6) | 27.3 (26.8-27.8)                                       | 26.5 (25.9-27.1) | 27.5 (27.0-28.1) |
| Iraq          | Men   | 24.6 (23.2-25.9)                                       | 24.2 (22.7-25.6) | 24.8 (23.4-26.2) | 27.7 (27.0-28.4)                                       | 27.2 (26.4-28.1) | 27.9 (27.2-28.6) |
|               | Women | 26.1 (24.3-28.0)                                       | 24.8 (22.8-26.9) | 26.7 (24.8-28.6) | 29.8 (29.0-30.6)                                       | 29.1 (28.1-30.0) | 30.1 (29.2-30.9) |
| Ireland       | Men   | 25.4 (24.4-26.4)                                       | 25.7 (24.6-26.8) | 25.2 (24.2-26.2) | 27.8 (27.0-28.6)                                       | 28.1 (27.2-29.0) | 27.7 (26.9-28.5) |
|               | Women | 24.4 (23.0-25.8)                                       | 24.7 (23.1-26.2) | 24.2 (22.7-25.7) | 26.8 (25.7-27.8)                                       | 27.0 (25.9-28.1) | 26.7 (25.6-27.7) |
| Israel        | Men   | 24.6 (23.7-25.5)                                       | 24.3 (23.2-25.3) | 24.6 (23.8-25.6) | 26.4 (25.8-26.9)                                       | 25.6 (24.9-26.2) | 26.4 (25.8-27.0) |
|               | Women | 24.9 (23.7-26.1)                                       | 24.0 (22.6-25.5) | 25.0 (23.8-26.2) | 25.6 (24.9-26.3)                                       | 24.5 (23.7-25.3) | 25.7 (24.9-26.4) |
| Italy         | Men   | 24.9 (24.5-25.4)                                       | 25.1 (24.5-25.7) | 24.9 (24.4-25.4) | 26.2 (25.5-26.9)                                       | 26.1 (25.4-26.8) | 26.3 (25.6-27.0) |
|               | Women | 24.9 (24.2-25.5)                                       | 25.4 (24.6-26.2) | 24.6 (24.0-25.3) | 24.5 (23.6-25.3)                                       | 24.3 (23.3-25.2) | 24.5 (23.6-25.4) |

| Country          | Sex   | Age-standardised mean BMI in 1985 (kg/m <sup>2</sup> ) |                  |                  | Age-standardised mean BMI in 2017 (kg/m <sup>2</sup> ) |                  |                  |
|------------------|-------|--------------------------------------------------------|------------------|------------------|--------------------------------------------------------|------------------|------------------|
|                  |       | National                                               | Rural            | Urban            | National                                               | Rural            | Urban            |
| Jamaica          | Men   | 22.6 (21.5-23.7)                                       | 22.1 (20.8-23.3) | 23.1 (22.0-24.3) | 25.4 (24.6-26.3)                                       | 25.0 (24.1-25.9) | 25.7 (24.8-26.6) |
|                  | Women | 25.1 (23.5-26.5)                                       | 24.6 (23.0-26.2) | 25.5 (24.0-27.0) | 29.1 (28.0-30.1)                                       | 29.1 (27.9-30.3) | 29.0 (27.9-30.1) |
| Japan            | Men   | 22.3 (22.1-22.6)                                       | 22.3 (22.0-22.6) | 22.3 (22.1-22.6) | 23.6 (23.2-24.0)                                       | 23.6 (23.2-24.1) | 23.6 (23.2-24.0) |
|                  | Women | 22.0 (21.8-22.3)                                       | 22.2 (21.9-22.5) | 22.0 (21.7-22.3) | 21.6 (21.1-22.1)                                       | 21.9 (21.3-22.4) | 21.6 (21.1-22.1) |
| Jordan           | Men   | 25.3 (24.1-26.4)                                       | 25.0 (23.7-26.2) | 25.4 (24.2-26.6) | 28.3 (27.7-28.9)                                       | 27.9 (27.2-28.6) | 28.4 (27.7-29.0) |
|                  | Women | 27.7 (26.3-29.2)                                       | 27.0 (25.4-28.5) | 28.1 (26.6-29.6) | 29.9 (29.3-30.5)                                       | 30.0 (29.3-30.7) | 29.9 (29.2-30.5) |
| Kazakhstan       | Men   | 24.1 (23.0-25.3)                                       | 23.8 (22.4-25.1) | 24.4 (23.3-25.6) | 26.3 (25.6-27.1)                                       | 26.2 (25.4-27.0) | 26.5 (25.7-27.3) |
|                  | Women | 25.2 (23.7-26.7)                                       | 24.9 (23.3-26.5) | 25.4 (23.8-27.0) | 26.4 (25.5-27.3)                                       | 26.6 (25.6-27.5) | 26.3 (25.3-27.2) |
| Kenya            | Men   | 20.1 (19.0-21.3)                                       | 19.9 (18.8-21.1) | 21.2 (19.9-22.5) | 22.0 (21.3-22.7)                                       | 21.6 (20.9-22.3) | 23.1 (22.3-23.9) |
|                  | Women | 21.2 (20.1-22.3)                                       | 20.9 (19.7-22.0) | 23.0 (21.7-24.2) | 24.4 (23.7-25.1)                                       | 23.7 (22.9-24.4) | 26.5 (25.7-27.3) |
| Kiribati         | Men   | 27.2 (25.8-28.6)                                       | 26.6 (25.1-28.1) | 28.4 (26.9-29.9) | 28.8 (27.9-29.6)                                       | 28.7 (27.7-29.7) | 28.9 (27.8-29.9) |
|                  | Women | 29.0 (27.1-31.0)                                       | 28.7 (26.6-30.7) | 29.7 (27.7-31.8) | 30.3 (29.4-31.3)                                       | 29.9 (28.7-31.1) | 30.9 (29.6-32.2) |
| Kuwait           | Men   | 26.0 (24.9-27.1)                                       | 25.2 (23.8-26.6) | 26.0 (24.9-27.1) | 29.0 (28.3-29.7)                                       | 28.2 (27.1-29.2) | 29.0 (28.4-29.7) |
|                  | Women | 28.1 (26.5-29.7)                                       | 26.3 (24.3-28.2) | 28.2 (26.6-29.7) | 30.6 (29.8-31.4)                                       | 29.8 (28.2-31.3) | 30.6 (29.8-31.4) |
| Kyrgyzstan       | Men   | 23.5 (22.4-24.6)                                       | 23.2 (22.0-24.4) | 23.9 (22.7-25.2) | 26.0 (25.1-26.8)                                       | 25.8 (24.9-26.8) | 26.2 (25.2-27.3) |
|                  | Women | 23.0 (21.6-24.5)                                       | 22.8 (21.3-24.3) | 23.4 (21.9-25.0) | 27.2 (26.3-28.1)                                       | 27.4 (26.5-28.3) | 26.8 (25.9-27.8) |
| Lao PDR          | Men   | 20.4 (19.0-21.8)                                       | 20.3 (18.8-21.7) | 20.9 (19.5-22.4) | 22.8 (22.0-23.6)                                       | 22.5 (21.7-23.4) | 23.2 (22.3-24.1) |
|                  | Women | 19.8 (17.9-21.7)                                       | 19.6 (17.7-21.5) | 21.2 (19.3-23.2) | 23.2 (22.3-24.2)                                       | 22.8 (21.7-23.8) | 23.9 (22.8-25.0) |
| Latvia           | Men   | 24.9 (23.7-26.1)                                       | 25.2 (23.9-26.4) | 24.8 (23.5-26.0) | 26.8 (25.9-27.8)                                       | 26.9 (25.8-27.9) | 26.8 (25.8-27.9) |
|                  | Women | 25.4 (23.7-27.1)                                       | 25.9 (24.1-27.8) | 25.1 (23.4-26.9) | 25.8 (24.6-27.1)                                       | 26.5 (25.2-27.8) | 25.5 (24.2-26.8) |
| Lebanon          | Men   | 24.9 (23.7-26.0)                                       | 24.7 (23.4-25.9) | 24.9 (23.8-26.1) | 27.7 (27.1-28.3)                                       | 27.4 (26.7-28.2) | 27.7 (27.1-28.3) |
|                  | Women | 25.0 (23.5-26.5)                                       | 24.3 (22.7-26.0) | 25.2 (23.6-26.7) | 27.0 (26.3-27.7)                                       | 27.1 (26.2-28.1) | 27.0 (26.2-27.7) |
| Lesotho          | Men   | 20.8 (19.4-22.2)                                       | 20.7 (19.2-22.2) | 21.8 (20.3-23.2) | 22.6 (22.0-23.3)                                       | 22.3 (21.7-23.0) | 23.5 (22.8-24.2) |
|                  | Women | 25.5 (24.0-26.9)                                       | 25.3 (23.8-26.8) | 27.0 (25.3-28.7) | 26.9 (26.1-27.7)                                       | 26.4 (25.5-27.3) | 28.1 (27.1-29.0) |
| Liberia          | Men   | 21.5 (20.1-22.9)                                       | 21.1 (19.6-22.6) | 22.2 (20.7-23.7) | 23.1 (22.4-23.8)                                       | 22.6 (21.8-23.4) | 23.6 (22.8-24.4) |
|                  | Women | 21.6 (19.6-23.5)                                       | 20.8 (18.8-22.8) | 22.7 (20.7-24.7) | 25.0 (24.1-26.0)                                       | 23.8 (22.8-24.8) | 26.3 (25.3-27.3) |
| Libya            | Men   | 24.2 (22.9-25.6)                                       | 23.7 (22.2-25.2) | 24.4 (23.0-25.8) | 26.9 (25.9-27.9)                                       | 26.3 (25.1-27.5) | 27.1 (26.1-28.1) |
|                  | Women | 26.3 (24.5-28.2)                                       | 25.0 (22.9-27.0) | 26.8 (24.9-28.7) | 29.5 (28.2-30.7)                                       | 28.9 (27.2-30.5) | 29.6 (28.3-31.0) |
| Lithuania        | Men   | 25.6 (24.8-26.4)                                       | 25.7 (24.8-26.5) | 25.5 (24.7-26.4) | 27.0 (25.9-28.1)                                       | 26.9 (25.7-28.0) | 27.1 (26.0-28.3) |
|                  | Women | 26.7 (25.7-27.8)                                       | 27.1 (26.0-28.3) | 26.5 (25.4-27.7) | 26.0 (24.5-27.6)                                       | 26.5 (24.9-28.1) | 25.8 (24.2-27.4) |
| Luxembourg       | Men   | 24.8 (23.6-26.1)                                       | 25.2 (23.9-26.5) | 24.8 (23.5-26.1) | 26.9 (25.8-27.9)                                       | 27.1 (26.0-28.2) | 26.9 (25.8-27.9) |
|                  | Women | 24.5 (22.6-26.4)                                       | 24.9 (22.9-26.8) | 24.4 (22.5-26.3) | 25.4 (24.1-26.9)                                       | 25.6 (24.2-27.0) | 25.4 (24.0-26.9) |
| Macedonia (TFYR) | Men   | 25.3 (23.0-27.7)                                       | 25.3 (22.9-27.6) | 25.4 (23.0-27.8) | 27.3 (24.9-29.7)                                       | 27.3 (24.8-29.7) | 27.3 (24.8-29.7) |
|                  | Women | 25.6 (23.8-27.5)                                       | 25.9 (23.9-27.9) | 25.4 (23.4-27.3) | 26.1 (24.1-28.0)                                       | 26.4 (24.3-28.5) | 25.9 (23.8-27.9) |
| Madagascar       | Men   | 19.9 (18.6-21.3)                                       | 19.7 (18.3-21.1) | 20.8 (19.3-22.3) | 21.9 (20.7-23.1)                                       | 21.4 (20.1-22.7) | 22.7 (21.4-24.1) |
|                  | Women | 19.7 (18.1-21.2)                                       | 19.5 (17.9-21.0) | 20.4 (18.8-22.0) | 21.5 (20.3-22.6)                                       | 20.8 (19.5-22.0) | 22.6 (21.4-23.8) |
| Malawi           | Men   | 20.1 (18.8-21.4)                                       | 20.0 (18.7-21.3) | 20.9 (19.5-22.3) | 22.0 (21.4-22.5)                                       | 21.8 (21.2-22.3) | 22.9 (22.3-23.6) |
|                  | Women | 20.8 (19.6-22.0)                                       | 20.7 (19.5-21.9) | 22.3 (21.0-23.6) | 23.5 (23.0-24.0)                                       | 23.1 (22.5-23.6) | 25.9 (25.3-26.5) |
| Malaysia         | Men   | 22.2 (21.1-23.2)                                       | 21.9 (20.8-22.9) | 22.6 (21.5-23.6) | 25.3 (24.8-25.8)                                       | 24.7 (24.2-25.3) | 25.5 (24.9-26.0) |
|                  | Women | 22.1 (20.7-23.5)                                       | 21.8 (20.4-23.2) | 22.5 (21.0-23.9) | 26.1 (25.5-26.7)                                       | 26.2 (25.6-26.9) | 26.1 (25.4-26.7) |
| Maldives         | Men   | 21.4 (19.9-22.9)                                       | 21.1 (19.5-22.7) | 22.1 (20.6-23.5) | 24.0 (22.9-25.2)                                       | 23.5 (22.2-24.9) | 24.5 (23.4-25.7) |
|                  | Women | 22.6 (20.9-24.3)                                       | 22.3 (20.6-24.1) | 23.3 (21.5-25.1) | 25.9 (24.8-27.1)                                       | 25.7 (24.5-27.0) | 26.2 (25.0-27.4) |
| Mali             | Men   | 20.7 (19.3-22.1)                                       | 20.4 (19.0-21.8) | 21.8 (20.3-23.3) | 22.9 (21.7-24.1)                                       | 22.4 (21.2-23.7) | 23.6 (22.3-25.0) |
|                  | Women | 20.0 (18.6-21.5)                                       | 19.6 (18.1-21.1) | 21.7 (20.2-23.2) | 23.6 (22.7-24.6)                                       | 22.3 (21.3-23.2) | 25.6 (24.5-26.6) |



| Country                          | Sex   | Age-standardised mean BMI in 1985 (kg/m <sup>2</sup> ) |                  |                  | Age-standardised mean BMI in 2017 (kg/m <sup>2</sup> ) |                  |                  |
|----------------------------------|-------|--------------------------------------------------------|------------------|------------------|--------------------------------------------------------|------------------|------------------|
|                                  |       | National                                               | Rural            | Urban            | National                                               | Rural            | Urban            |
| Malta                            | Men   | 25.5 (23.9-27.0)                                       | 25.8 (24.3-27.2) | 25.5 (23.9-27.1) | 27.2 (25.3-29.1)                                       | 27.2 (25.3-29.0) | 27.2 (25.3-29.1) |
|                                  | Women | 25.5 (23.5-27.6)                                       | 25.8 (24.1-27.6) | 25.5 (23.4-27.6) | 25.5 (22.8-28.1)                                       | 25.4 (22.9-28.0) | 25.5 (22.8-28.2) |
| Marshall Islands                 | Men   | 27.4 (26.0-28.8)                                       | 26.3 (24.7-27.8) | 28.1 (26.6-29.5) | 28.9 (27.6-30.3)                                       | 28.8 (27.4-30.3) | 29.0 (27.5-30.4) |
|                                  | Women | 29.0 (27.2-30.9)                                       | 28.4 (26.4-30.6) | 29.4 (27.4-31.3) | 30.5 (28.8-32.3)                                       | 29.9 (27.9-31.9) | 30.8 (28.9-32.6) |
| Mauritania                       | Men   | 21.2 (19.5-22.9)                                       | 20.7 (18.9-22.6) | 22.0 (20.3-23.8) | 23.3 (21.7-24.8)                                       | 22.6 (20.8-24.2) | 23.8 (22.1-25.3) |
|                                  | Women | 23.3 (21.5-25.1)                                       | 22.6 (20.7-24.5) | 24.6 (22.8-26.4) | 26.6 (25.0-28.2)                                       | 24.9 (23.1-26.6) | 27.7 (26.0-29.3) |
| Mauritius                        | Men   | 22.5 (21.9-23.1)                                       | 22.4 (21.7-23.0) | 22.8 (22.1-23.4) | 24.6 (23.7-25.5)                                       | 24.4 (23.4-25.3) | 25.0 (24.0-25.9) |
|                                  | Women | 23.7 (22.9-24.4)                                       | 23.5 (22.7-24.3) | 24.0 (23.2-24.7) | 25.8 (24.6-27.0)                                       | 25.5 (24.2-26.7) | 26.3 (25.0-27.5) |
| Mexico                           | Men   | 25.1 (24.1-26.1)                                       | 24.4 (23.3-25.6) | 25.4 (24.4-26.4) | 27.6 (27.1-28.2)                                       | 26.8 (26.3-27.3) | 27.9 (27.3-28.4) |
|                                  | Women | 24.2 (23.2-25.2)                                       | 23.3 (22.2-24.4) | 24.6 (23.6-25.6) | 28.5 (27.9-29.1)                                       | 28.1 (27.5-28.8) | 28.6 (28.0-29.2) |
| Micronesia (Federated States of) | Men   | 26.5 (25.1-27.8)                                       | 26.0 (24.6-27.5) | 27.7 (26.2-29.1) | 28.7 (27.7-29.8)                                       | 28.8 (27.7-29.9) | 28.7 (27.5-29.8) |
|                                  | Women | 29.0 (27.1-31.0)                                       | 28.6 (26.7-30.7) | 30.1 (28.1-32.2) | 30.2 (28.9-31.5)                                       | 29.9 (28.5-31.2) | 31.5 (30.0-33.0) |
| Moldova                          | Men   | 24.9 (23.5-26.4)                                       | 24.8 (23.3-26.4) | 25.1 (23.5-26.6) | 26.6 (25.8-27.4)                                       | 26.3 (25.5-27.2) | 27.0 (26.2-27.9) |
|                                  | Women | 26.8 (24.9-28.7)                                       | 27.0 (25.1-29.0) | 26.5 (24.6-28.4) | 27.1 (26.2-28.0)                                       | 27.4 (26.4-28.4) | 26.8 (25.8-27.8) |
| Mongolia                         | Men   | 22.9 (21.6-24.2)                                       | 22.6 (21.2-23.9) | 23.2 (21.8-24.5) | 25.8 (25.1-26.5)                                       | 25.6 (24.9-26.4) | 25.8 (25.1-26.6) |
|                                  | Women | 23.5 (21.8-25.2)                                       | 23.1 (21.3-25.0) | 23.8 (22.0-25.6) | 26.6 (25.7-27.5)                                       | 26.8 (25.8-27.8) | 26.5 (25.5-27.5) |
| Montenegro                       | Men   | 25.1 (23.1-27.1)                                       | 25.1 (23.0-27.1) | 25.2 (23.1-27.2) | 27.1 (25.2-29.0)                                       | 27.1 (25.1-29.1) | 27.1 (25.1-29.0) |
|                                  | Women | 25.6 (22.9-28.3)                                       | 25.8 (23.1-28.6) | 25.4 (22.6-28.2) | 26.0 (23.3-28.8)                                       | 26.3 (23.5-29.2) | 25.8 (23.1-28.6) |
| Morocco                          | Men   | 22.2 (21.0-23.5)                                       | 21.9 (20.5-23.2) | 22.7 (21.4-24.0) | 24.6 (24.0-25.2)                                       | 24.1 (23.4-24.7) | 24.9 (24.2-25.6) |
|                                  | Women | 23.9 (22.7-25.1)                                       | 22.8 (21.6-24.1) | 25.3 (24.0-26.6) | 27.1 (26.4-27.8)                                       | 26.3 (25.5-27.0) | 27.6 (26.9-28.4) |
| Mozambique                       | Men   | 19.9 (18.6-21.2)                                       | 19.7 (18.3-21.0) | 21.0 (19.7-22.4) | 22.1 (21.5-22.8)                                       | 21.6 (20.9-22.4) | 23.2 (22.4-24.0) |
|                                  | Women | 20.6 (19.1-22.2)                                       | 20.3 (18.7-21.8) | 22.2 (20.7-23.8) | 23.3 (22.5-24.1)                                       | 22.4 (21.5-23.2) | 25.3 (24.4-26.1) |
| Myanmar                          | Men   | 19.8 (18.5-21.1)                                       | 19.5 (18.2-20.8) | 20.6 (19.2-21.9) | 21.8 (21.2-22.5)                                       | 21.4 (20.8-22.1) | 22.6 (21.9-23.3) |
|                                  | Women | 20.2 (18.4-22.1)                                       | 19.8 (18.0-21.7) | 21.3 (19.4-23.2) | 23.0 (22.4-23.6)                                       | 22.5 (21.9-23.1) | 23.9 (23.2-24.5) |
| Namibia                          | Men   | 20.9 (19.6-22.3)                                       | 20.6 (19.1-22.1) | 21.8 (20.4-23.3) | 22.9 (21.9-24.0)                                       | 22.3 (21.1-23.5) | 23.7 (22.5-24.8) |
|                                  | Women | 22.8 (21.5-24.1)                                       | 22.0 (20.6-23.3) | 25.0 (23.6-26.3) | 25.3 (24.4-26.2)                                       | 23.9 (22.9-24.8) | 26.8 (25.8-27.8) |
| Nauru                            | Men   | 32.6 (32.0-33.2)                                       | na*              | 32.6 (32.0-33.2) | 32.9 (31.7-34.1)                                       | na*              | 32.9 (31.7-34.1) |
|                                  | Women | 34.1 (33.4-34.8)                                       | na*              | 34.1 (33.4-34.8) | 33.6 (32.0-35.2)                                       | na*              | 33.6 (32.0-35.2) |
| Nepal                            | Men   | 19.7 (18.5-20.9)                                       | 19.5 (18.3-20.8) | 22.2 (20.9-23.5) | 22.4 (21.9-22.9)                                       | 22.2 (21.7-22.7) | 23.2 (22.7-23.8) |
|                                  | Women | 18.4 (17.0-19.9)                                       | 18.3 (16.8-19.7) | 20.5 (19.0-22.0) | 22.5 (21.9-23.1)                                       | 22.1 (21.5-22.7) | 23.9 (23.3-24.5) |
| Netherlands                      | Men   | 24.1 (23.4-24.8)                                       | 24.3 (23.5-25.1) | 24.0 (23.3-24.7) | 25.9 (25.2-26.7)                                       | 26.0 (25.1-26.8) | 25.9 (25.2-26.7) |
|                                  | Women | 24.3 (23.2-25.3)                                       | 24.5 (23.3-25.7) | 24.2 (23.1-25.2) | 25.0 (24.0-26.0)                                       | 24.9 (23.8-26.0) | 25.0 (24.0-26.0) |
| New Zealand                      | Men   | 25.3 (24.6-26.0)                                       | 25.3 (24.5-26.2) | 25.3 (24.5-26.0) | 28.1 (27.6-28.5)                                       | 28.0 (27.5-28.5) | 28.1 (27.6-28.5) |
|                                  | Women | 24.6 (23.7-25.5)                                       | 24.8 (23.7-25.9) | 24.6 (23.7-25.5) | 28.0 (27.5-28.5)                                       | 28.0 (27.4-28.6) | 28.0 (27.5-28.5) |
| Nicaragua                        | Men   | 24.2 (22.4-26.0)                                       | 23.6 (21.8-25.6) | 24.8 (23.0-26.5) | 26.8 (25.1-28.4)                                       | 26.1 (24.3-27.8) | 27.2 (25.6-28.9) |
|                                  | Women | 23.6 (22.0-25.1)                                       | 22.6 (21.0-24.3) | 24.5 (22.9-26.1) | 28.0 (27.0-29.0)                                       | 27.3 (26.3-28.4) | 28.5 (27.5-29.5) |
| Niger                            | Men   | 19.6 (18.2-21.1)                                       | 19.5 (18.0-21.0) | 20.8 (19.2-22.4) | 21.4 (20.3-22.5)                                       | 21.2 (20.1-22.3) | 22.4 (21.1-23.7) |
|                                  | Women | 20.0 (18.8-21.2)                                       | 19.6 (18.3-20.9) | 22.4 (21.1-23.7) | 22.3 (21.3-23.3)                                       | 21.6 (20.6-22.6) | 25.3 (24.2-26.4) |
| Nigeria                          | Men   | 21.0 (20.2-21.8)                                       | 20.8 (19.9-21.6) | 21.7 (20.8-22.5) | 22.5 (21.6-23.3)                                       | 22.1 (21.2-23.0) | 22.9 (21.9-23.8) |
|                                  | Women | 22.2 (21.2-23.2)                                       | 21.8 (20.7-22.9) | 23.5 (22.4-24.5) | 24.1 (23.2-24.9)                                       | 23.1 (22.3-24.0) | 25.0 (24.1-25.9) |
| Niue                             | Men   | 29.4 (27.9-31.0)                                       | 28.8 (27.2-30.5) | 30.7 (29.0-32.3) | 31.6 (30.6-32.6)                                       | 31.5 (30.4-32.6) | 31.6 (30.4-32.8) |
|                                  | Women | 31.5 (29.3-33.7)                                       | 31.2 (28.9-33.5) | 32.2 (29.8-34.5) | 33.2 (32.0-34.5)                                       | 32.8 (31.3-34.3) | 33.8 (32.2-35.4) |
| North Korea                      | Men   | 22.0 (19.5-24.5)                                       | 21.5 (18.9-24.0) | 22.4 (19.8-24.9) | 24.5 (21.9-27.1)                                       | 24.1 (21.5-26.6) | 24.7 (22.0-27.3) |
|                                  | Women | 22.3 (19.0-25.6)                                       | 21.8 (18.4-25.1) | 22.6 (19.3-26.0) | 24.2 (20.8-27.6)                                       | 24.0 (20.6-27.5) | 24.3 (20.8-27.9) |

| Country                          | Sex   | Age-standardised mean BMI in 1985 (kg/m <sup>2</sup> ) |                  |                  | Age-standardised mean BMI in 2017 (kg/m <sup>2</sup> ) |                  |                  |
|----------------------------------|-------|--------------------------------------------------------|------------------|------------------|--------------------------------------------------------|------------------|------------------|
|                                  |       | National                                               | Rural            | Urban            | National                                               | Rural            | Urban            |
| Norway                           | Men   | 24.5 (23.7-25.2)                                       | 24.7 (24.0-25.4) | 24.4 (23.6-25.2) | 26.7 (25.7-27.7)                                       | 26.8 (25.9-27.9) | 26.7 (25.6-27.7) |
|                                  | Women | 23.7 (22.7-24.7)                                       | 24.3 (23.4-25.3) | 23.4 (22.3-24.5) | 25.2 (23.7-26.7)                                       | 25.8 (24.3-27.3) | 25.0 (23.6-26.6) |
| Occupied Palestinian Territory   | Men   | 25.0 (23.8-26.1)                                       | 24.6 (23.4-25.8) | 25.2 (24.0-26.4) | 27.9 (27.0-28.8)                                       | 27.4 (26.4-28.4) | 28.1 (27.2-29.0) |
|                                  | Women | 26.7 (25.1-28.3)                                       | 25.8 (24.2-27.4) | 27.3 (25.6-28.8) | 29.8 (28.7-31.0)                                       | 29.5 (28.2-30.8) | 29.9 (28.7-31.1) |
| Oman                             | Men   | 23.5 (22.6-24.3)                                       | 22.9 (21.9-23.9) | 23.9 (23.0-24.8) | 26.5 (25.6-27.4)                                       | 25.6 (24.6-26.7) | 26.7 (25.8-27.7) |
|                                  | Women | 25.1 (24.0-26.3)                                       | 24.3 (23.0-25.7) | 25.7 (24.5-26.9) | 27.2 (26.0-28.5)                                       | 27.0 (25.6-28.4) | 27.3 (26.0-28.6) |
| Pakistan                         | Men   | 20.5 (19.6-21.4)                                       | 19.8 (18.9-20.8) | 22.2 (21.2-23.1) | 23.4 (22.7-24.1)                                       | 23.1 (22.3-23.9) | 23.9 (23.1-24.7) |
|                                  | Women | 21.0 (19.9-22.1)                                       | 20.2 (19.0-21.4) | 22.8 (21.7-24.0) | 24.8 (24.0-25.6)                                       | 23.9 (23.1-24.7) | 26.2 (25.3-27.1) |
| Palau                            | Men   | 28.2 (26.7-29.8)                                       | 27.0 (25.3-28.8) | 28.8 (27.2-30.5) | 29.5 (28.5-30.6)                                       | 29.5 (28.1-30.9) | 29.5 (28.5-30.6) |
|                                  | Women | 28.7 (26.4-30.9)                                       | 28.1 (25.6-30.5) | 28.9 (26.6-31.3) | 29.7 (28.4-31.0)                                       | 29.0 (27.2-30.9) | 29.8 (28.5-31.1) |
| Panama                           | Men   | 23.8 (22.3-25.2)                                       | 23.1 (21.6-24.6) | 24.3 (22.8-25.8) | 26.4 (25.3-27.4)                                       | 25.6 (24.4-26.7) | 26.8 (25.7-27.9) |
|                                  | Women | 23.9 (22.0-25.8)                                       | 23.1 (21.1-25.1) | 24.6 (22.6-26.6) | 27.9 (26.5-29.2)                                       | 27.3 (25.9-28.8) | 28.1 (26.7-29.6) |
| Papua New Guinea                 | Men   | 22.6 (21.4-23.8)                                       | 22.4 (21.1-23.6) | 24.1 (22.5-25.7) | 25.4 (24.2-26.5)                                       | 25.3 (24.1-26.5) | 25.7 (24.2-27.2) |
|                                  | Women | 22.2 (20.6-23.8)                                       | 22.0 (20.4-23.6) | 23.5 (21.3-25.7) | 25.7 (24.2-27.3)                                       | 25.6 (24.0-27.1) | 26.9 (24.9-28.9) |
| Paraguay                         | Men   | 24.1 (22.6-25.5)                                       | 23.4 (21.8-24.9) | 24.9 (23.4-26.4) | 27.0 (26.0-27.9)                                       | 26.0 (25.1-27.0) | 27.6 (26.6-28.5) |
|                                  | Women | 24.6 (22.5-26.8)                                       | 24.1 (21.9-26.3) | 25.3 (23.1-27.5) | 28.1 (27.1-29.3)                                       | 27.9 (26.7-29.1) | 28.3 (27.1-29.5) |
| Peru                             | Men   | 23.2 (21.9-24.6)                                       | 22.0 (20.5-23.4) | 23.8 (22.4-25.2) | 26.5 (26.2-26.9)                                       | 24.5 (24.2-24.9) | 27.0 (26.7-27.4) |
|                                  | Women | 24.5 (23.3-25.7)                                       | 23.3 (22.1-24.6) | 25.1 (23.9-26.3) | 27.5 (27.1-27.8)                                       | 26.0 (25.6-26.4) | 27.9 (27.5-28.2) |
| Philippines                      | Men   | 21.1 (20.3-22.0)                                       | 20.7 (19.8-21.6) | 21.7 (20.7-22.7) | 23.0 (22.5-23.5)                                       | 22.5 (22.0-23.1) | 23.6 (23.1-24.1) |
|                                  | Women | 20.1 (19.4-20.8)                                       | 19.5 (18.8-20.2) | 20.9 (20.1-21.6) | 23.5 (22.9-24.1)                                       | 23.0 (22.4-23.7) | 24.1 (23.4-24.7) |
| Poland                           | Men   | 25.4 (24.8-25.9)                                       | 25.3 (24.6-26.0) | 25.4 (24.8-26.0) | 27.5 (27.0-28.0)                                       | 27.5 (27.0-28.0) | 27.4 (26.9-28.0) |
|                                  | Women | 26.0 (25.1-26.9)                                       | 26.3 (25.2-27.3) | 25.7 (24.8-26.7) | 26.0 (25.4-26.5)                                       | 26.4 (25.8-27.0) | 25.7 (25.1-26.3) |
| Portugal                         | Men   | 24.4 (23.9-24.9)                                       | 24.6 (24.1-25.1) | 24.1 (23.6-24.6) | 26.3 (25.4-27.2)                                       | 26.4 (25.5-27.3) | 26.2 (25.3-27.1) |
|                                  | Women | 25.4 (24.0-26.7)                                       | 25.6 (24.2-27.0) | 25.1 (23.6-26.6) | 25.0 (23.9-26.2)                                       | 25.1 (23.9-26.4) | 25.0 (23.8-26.1) |
| Puerto Rico                      | Men   | 25.8 (24.3-27.3)                                       | 24.8 (23.0-26.5) | 25.9 (24.4-27.5) | 28.4 (27.1-29.7)                                       | 27.6 (26.1-29.2) | 28.4 (27.1-29.7) |
|                                  | Women | 25.4 (23.5-27.3)                                       | 24.3 (22.1-26.4) | 25.7 (23.7-27.6) | 28.8 (27.4-30.1)                                       | 28.3 (26.5-30.1) | 28.8 (27.4-30.2) |
| Qatar                            | Men   | 25.7 (24.3-26.9)                                       | 25.0 (23.4-26.5) | 25.7 (24.4-27.0) | 28.7 (27.9-29.6)                                       | 27.9 (26.7-29.1) | 28.7 (27.9-29.6) |
|                                  | Women | 26.8 (24.8-28.7)                                       | 25.2 (23.0-27.4) | 27.0 (25.0-28.8) | 30.4 (29.4-31.5)                                       | 29.6 (27.9-31.3) | 30.4 (29.4-31.5) |
| Romania                          | Men   | 24.3 (23.2-25.3)                                       | 24.3 (23.1-25.4) | 24.3 (23.2-25.3) | 27.0 (26.4-27.6)                                       | 27.1 (26.5-27.8) | 26.9 (26.3-27.5) |
|                                  | Women | 25.2 (23.9-26.5)                                       | 25.3 (23.7-26.9) | 25.2 (23.8-26.5) | 26.8 (26.2-27.5)                                       | 27.0 (26.2-27.8) | 26.7 (26.0-27.5) |
| Russian Federation               | Men   | 24.8 (24.3-25.3)                                       | 24.9 (24.3-25.6) | 24.8 (24.3-25.3) | 26.1 (25.3-26.9)                                       | 25.8 (25.0-26.7) | 26.2 (25.4-27.0) |
|                                  | Women | 26.6 (26.0-27.2)                                       | 26.7 (26.0-27.5) | 26.5 (25.9-27.1) | 26.7 (25.7-27.6)                                       | 26.9 (25.8-27.9) | 26.6 (25.6-27.6) |
| Rwanda                           | Men   | 19.4 (18.1-20.8)                                       | 19.4 (18.0-20.8) | 20.2 (18.8-21.6) | 21.4 (20.8-21.9)                                       | 21.1 (20.5-21.7) | 22.1 (21.4-22.7) |
|                                  | Women | 20.3 (18.7-22.0)                                       | 20.3 (18.6-22.0) | 21.5 (19.8-23.2) | 23.0 (22.3-23.8)                                       | 22.4 (21.7-23.2) | 24.5 (23.7-25.3) |
| Saint Kitts and Nevis            | Men   | 25.6 (23.9-27.2)                                       | 25.3 (23.5-26.9) | 26.2 (24.5-28.0) | 28.5 (27.1-29.9)                                       | 28.3 (26.8-29.7) | 28.9 (27.3-30.4) |
|                                  | Women | 26.8 (24.6-29.0)                                       | 26.4 (24.1-28.6) | 27.7 (25.3-30.0) | 30.8 (28.9-32.7)                                       | 30.7 (28.7-32.6) | 31.1 (29.1-33.1) |
| Saint Lucia                      | Men   | 25.2 (23.7-26.7)                                       | 25.1 (23.4-26.6) | 25.5 (24.0-27.0) | 29.2 (28.2-30.1)                                       | 29.2 (28.2-30.1) | 29.2 (28.0-30.5) |
|                                  | Women | 25.8 (23.9-27.7)                                       | 25.5 (23.4-27.6) | 26.5 (24.6-28.4) | 30.5 (29.3-31.7)                                       | 30.5 (29.2-31.7) | 30.5 (29.0-32.1) |
| Saint Vincent and the Grenadines | Men   | 23.6 (21.1-26.0)                                       | 23.2 (20.7-25.7) | 24.2 (21.7-26.7) | 26.4 (24.0-28.7)                                       | 26.0 (23.6-28.4) | 26.7 (24.3-29.1) |
|                                  | Women | 24.6 (21.4-27.7)                                       | 24.1 (20.8-27.2) | 25.4 (22.1-28.5) | 28.3 (25.2-31.4)                                       | 28.0 (24.8-31.3) | 28.5 (25.3-31.7) |
| Samoa                            | Men   | 27.5 (26.6-28.4)                                       | 27.0 (26.0-27.9) | 29.6 (28.5-30.7) | 30.4 (29.7-31.2)                                       | 30.3 (29.5-31.1) | 31.1 (30.1-32.1) |
|                                  | Women | 30.0 (28.8-31.2)                                       | 29.7 (28.5-31.0) | 30.8 (29.5-32.1) | 33.9 (32.9-34.9)                                       | 33.7 (32.6-34.8) | 34.7 (33.4-36.0) |
| Sao Tome and Principe            | Men   | 21.7 (20.3-23.0)                                       | 21.2 (19.7-22.6) | 22.4 (21.0-23.9) | 23.8 (22.9-24.7)                                       | 23.1 (22.1-24.0) | 24.2 (23.2-25.2) |
|                                  | Women | 22.5 (20.5-24.3)                                       | 22.0 (20.0-23.9) | 23.2 (21.2-25.1) | 25.7 (24.5-26.8)                                       | 24.5 (23.2-25.8) | 26.3 (25.0-27.5) |

| Country              | Sex   | Age-standardised mean BMI in 1985 (kg/m <sup>2</sup> ) |                  |                  | Age-standardised mean BMI in 2017 (kg/m <sup>2</sup> ) |                  |                  |
|----------------------|-------|--------------------------------------------------------|------------------|------------------|--------------------------------------------------------|------------------|------------------|
|                      |       | National                                               | Rural            | Urban            | National                                               | Rural            | Urban            |
| Saudi Arabia         | Men   | 25.6 (25.0-26.2)                                       | 24.8 (23.9-25.6) | 25.9 (25.3-26.6) | 28.0 (27.3-28.7)                                       | 27.0 (26.2-27.8) | 28.2 (27.5-28.9) |
|                      | Women | 27.2 (26.5-28.0)                                       | 25.9 (24.8-27.1) | 27.7 (27.0-28.5) | 29.5 (28.6-30.3)                                       | 28.9 (27.8-30.0) | 29.6 (28.7-30.4) |
| Senegal              | Men   | 20.0 (18.9-21.2)                                       | 19.6 (18.4-20.9) | 20.7 (19.6-21.9) | 21.7 (20.8-22.6)                                       | 21.3 (20.4-22.2) | 22.3 (21.3-23.2) |
|                      | Women | 21.9 (21.1-22.7)                                       | 21.2 (20.3-22.0) | 23.2 (22.3-24.1) | 23.7 (22.6-24.8)                                       | 22.4 (21.3-23.6) | 25.3 (24.2-26.5) |
| Serbia               | Men   | 25.2 (24.2-26.2)                                       | 25.1 (24.0-26.2) | 25.3 (24.3-26.3) | 27.0 (26.4-27.6)                                       | 27.0 (26.3-27.7) | 27.1 (26.4-27.7) |
|                      | Women | 25.7 (24.4-27.1)                                       | 26.0 (24.5-27.5) | 25.5 (24.1-26.9) | 25.5 (24.7-26.4)                                       | 25.9 (24.9-26.8) | 25.3 (24.4-26.2) |
| Seychelles           | Men   | 22.8 (22.0-23.6)                                       | 22.6 (21.7-23.4) | 23.1 (22.3-24.0) | 25.6 (24.8-26.3)                                       | 25.2 (24.4-26.0) | 25.9 (25.0-26.7) |
|                      | Women | 25.1 (24.1-26.0)                                       | 25.0 (24.0-26.0) | 25.1 (24.0-26.2) | 27.9 (27.0-28.9)                                       | 27.6 (26.6-28.6) | 28.2 (27.1-29.3) |
| Sierra Leone         | Men   | 20.3 (18.9-21.7)                                       | 20.0 (18.5-21.4) | 21.1 (19.7-22.6) | 22.0 (21.2-22.7)                                       | 21.6 (20.8-22.3) | 22.5 (21.7-23.4) |
|                      | Women | 21.5 (19.6-23.5)                                       | 20.9 (19.0-22.9) | 22.8 (20.8-24.8) | 23.6 (22.6-24.5)                                       | 22.5 (21.5-23.5) | 25.1 (24.1-26.2) |
| Singapore            | Men   | 22.8 (22.2-23.3)                                       | na*              | 22.8 (22.2-23.3) | 24.4 (23.6-25.1)                                       | na*              | 24.4 (23.6-25.1) |
|                      | Women | 23.5 (22.7-24.2)                                       | na*              | 23.5 (22.7-24.2) | 23.0 (22.1-24.0)                                       | na*              | 23.0 (22.1-24.0) |
| Slovakia             | Men   | 25.6 (24.6-26.5)                                       | 25.5 (24.4-26.6) | 25.6 (24.6-26.7) | 27.4 (26.6-28.2)                                       | 27.4 (26.5-28.3) | 27.4 (26.5-28.3) |
|                      | Women | 25.3 (24.1-26.6)                                       | 25.6 (24.1-27.1) | 25.1 (23.7-26.5) | 25.6 (24.6-26.6)                                       | 25.9 (24.6-27.1) | 25.3 (24.2-26.5) |
| Slovenia             | Men   | 25.1 (23.2-26.9)                                       | 25.0 (23.1-26.8) | 25.2 (23.3-27.0) | 26.8 (25.2-28.4)                                       | 26.8 (25.1-28.5) | 26.9 (25.2-28.5) |
|                      | Women | 26.0 (23.4-28.6)                                       | 26.1 (23.5-28.7) | 25.9 (23.3-28.5) | 27.0 (24.7-29.2)                                       | 27.0 (24.6-29.4) | 26.9 (24.6-29.3) |
| Solomon Islands      | Men   | 23.0 (21.5-24.5)                                       | 22.8 (21.3-24.3) | 24.2 (22.6-25.9) | 25.7 (25.0-26.4)                                       | 25.7 (24.9-26.5) | 25.7 (24.7-26.8) |
|                      | Women | 24.1 (21.9-26.3)                                       | 23.9 (21.6-26.1) | 25.3 (22.9-27.7) | 26.9 (26.0-27.8)                                       | 26.5 (25.6-27.5) | 28.1 (26.8-29.4) |
| Somalia              | Men   | 20.5 (18.1-22.9)                                       | 20.2 (17.7-22.6) | 21.2 (18.8-23.7) | 22.5 (20.1-24.9)                                       | 22.0 (19.6-24.4) | 23.3 (20.9-25.8) |
|                      | Women | 21.3 (18.2-24.5)                                       | 20.9 (17.7-24.0) | 22.4 (19.3-25.6) | 24.0 (20.9-27.0)                                       | 23.0 (19.9-26.1) | 25.4 (22.3-28.6) |
| South Africa         | Men   | 23.1 (22.1-24.0)                                       | 22.5 (21.5-23.5) | 23.7 (22.7-24.7) | 25.1 (24.4-25.7)                                       | 24.2 (23.5-24.8) | 25.6 (24.9-26.2) |
|                      | Women | 27.0 (25.8-28.3)                                       | 26.2 (24.8-27.6) | 27.8 (26.5-29.1) | 29.6 (28.8-30.3)                                       | 28.7 (27.9-29.5) | 30.0 (29.2-30.8) |
| South Korea          | Men   | 22.2 (21.5-22.9)                                       | 22.0 (21.2-22.8) | 22.4 (21.7-23.1) | 24.6 (24.3-24.9)                                       | 24.5 (24.1-24.8) | 24.6 (24.3-24.9) |
|                      | Women | 22.3 (21.4-23.2)                                       | 22.2 (21.2-23.2) | 22.4 (21.5-23.2) | 23.1 (22.7-23.5)                                       | 23.3 (22.8-23.7) | 23.1 (22.7-23.5) |
| Spain                | Men   | 25.3 (24.7-25.8)                                       | 25.6 (24.9-26.2) | 25.2 (24.6-25.8) | 27.0 (26.4-27.5)                                       | 27.0 (26.4-27.6) | 26.9 (26.4-27.5) |
|                      | Women | 25.5 (24.8-26.2)                                       | 25.9 (25.1-26.7) | 25.4 (24.7-26.1) | 24.8 (24.1-25.5)                                       | 25.1 (24.3-25.8) | 24.7 (24.0-25.4) |
| Sri Lanka            | Men   | 20.1 (18.9-21.4)                                       | 20.0 (18.7-21.2) | 20.8 (19.4-22.2) | 22.6 (21.8-23.3)                                       | 22.4 (21.7-23.1) | 23.3 (22.3-24.3) |
|                      | Women | 20.5 (18.8-22.2)                                       | 20.3 (18.5-22.0) | 21.5 (19.6-23.5) | 23.7 (22.9-24.6)                                       | 23.6 (22.7-24.5) | 24.4 (23.0-25.8) |
| Sudan (former)       | Men   | 21.0 (19.6-22.5)                                       | 20.8 (19.4-22.3) | 21.9 (20.5-23.4) | 22.9 (22.3-23.6)                                       | 22.5 (21.8-23.2) | 23.8 (23.1-24.6) |
|                      | Women | 22.4 (20.4-24.4)                                       | 22.0 (20.0-24.1) | 23.9 (21.8-26.0) | 24.4 (23.5-25.1)                                       | 23.4 (22.6-24.3) | 26.4 (25.5-27.3) |
| Suriname             | Men   | 23.2 (21.5-25.0)                                       | 22.6 (20.7-24.5) | 23.5 (21.8-25.4) | 25.6 (24.3-26.9)                                       | 25.2 (23.7-26.8) | 25.8 (24.6-27.1) |
|                      | Women | 24.9 (22.6-27.2)                                       | 24.0 (21.5-26.5) | 25.4 (23.0-27.7) | 28.3 (26.7-29.8)                                       | 28.0 (26.1-29.9) | 28.4 (26.9-29.9) |
| Swaziland            | Men   | 22.4 (21.0-23.9)                                       | 22.2 (20.7-23.7) | 23.3 (21.8-24.8) | 24.4 (23.6-25.2)                                       | 24.1 (23.3-25.0) | 25.4 (24.5-26.4) |
|                      | Women | 26.7 (24.7-28.6)                                       | 26.4 (24.4-28.5) | 27.5 (25.4-29.5) | 28.9 (27.9-29.8)                                       | 28.6 (27.6-29.6) | 29.6 (28.4-30.8) |
| Sweden               | Men   | 24.2 (23.8-24.6)                                       | 24.8 (24.3-25.2) | 24.1 (23.7-24.5) | 26.3 (25.7-27.0)                                       | 26.8 (26.1-27.5) | 26.3 (25.6-26.9) |
|                      | Women | 23.8 (23.1-24.6)                                       | 24.7 (23.8-25.6) | 23.7 (22.9-24.4) | 24.9 (24.0-25.7)                                       | 25.4 (24.4-26.4) | 24.8 (23.9-25.6) |
| Switzerland          | Men   | 24.8 (24.1-25.5)                                       | 25.1 (24.4-25.8) | 24.6 (23.9-25.4) | 26.5 (25.9-27.1)                                       | 26.7 (26.1-27.4) | 26.4 (25.8-27.1) |
|                      | Women | 23.4 (22.5-24.3)                                       | 23.8 (22.8-24.8) | 23.2 (22.2-24.2) | 23.9 (22.7-25.0)                                       | 24.1 (22.6-25.7) | 23.8 (22.6-24.9) |
| Syrian Arab Republic | Men   | 24.6 (23.3-25.8)                                       | 24.2 (22.8-25.6) | 25.0 (23.6-26.3) | 27.4 (26.3-28.5)                                       | 27.0 (25.7-28.2) | 27.7 (26.5-29.0) |
|                      | Women | 26.1 (24.4-27.9)                                       | 25.3 (23.4-27.2) | 27.0 (25.2-28.9) | 29.4 (27.8-31.0)                                       | 29.0 (27.3-30.7) | 29.7 (28.0-31.4) |
| Taiwan               | Men   | 22.5 (21.7-23.3)                                       | 22.3 (21.4-23.1) | 22.7 (21.8-23.5) | 24.8 (24.1-25.5)                                       | 24.7 (24.1-25.4) | 24.8 (24.1-25.5) |
|                      | Women | 22.5 (21.4-23.5)                                       | 22.4 (21.2-23.6) | 22.5 (21.3-23.6) | 23.3 (22.5-24.1)                                       | 23.7 (22.9-24.6) | 23.2 (22.4-24.1) |
| Tajikistan           | Men   | 23.5 (21.9-25.0)                                       | 23.2 (21.5-24.9) | 24.0 (22.3-25.7) | 26.0 (25.3-26.7)                                       | 25.9 (25.1-26.7) | 26.3 (25.2-27.3) |
|                      | Women | 22.6 (20.6-24.5)                                       | 22.1 (20.1-24.1) | 23.5 (21.3-25.5) | 26.4 (25.6-27.1)                                       | 26.3 (25.4-27.1) | 26.7 (25.8-27.6) |

| Country                  | Sex   | Age-standardised mean BMI in 1985 (kg/m <sup>2</sup> ) |                  |                  | Age-standardised mean BMI in 2017 (kg/m <sup>2</sup> ) |                  |                  |
|--------------------------|-------|--------------------------------------------------------|------------------|------------------|--------------------------------------------------------|------------------|------------------|
|                          |       | National                                               | Rural            | Urban            | National                                               | Rural            | Urban            |
| Tanzania                 | Men   | 20.5 (19.2-21.8)                                       | 20.2 (18.9-21.6) | 21.9 (20.6-23.2) | 22.5 (21.7-23.2)                                       | 21.9 (21.0-22.7) | 23.7 (22.8-24.6) |
|                          | Women | 20.7 (19.6-21.9)                                       | 20.5 (19.3-21.6) | 22.1 (20.9-23.3) | 24.1 (23.5-24.7)                                       | 23.1 (22.4-23.8) | 26.3 (25.6-27.0) |
| Thailand                 | Men   | 21.0 (20.3-21.7)                                       | 20.7 (19.9-21.4) | 21.7 (20.9-22.5) | 23.9 (23.0-24.8)                                       | 23.3 (22.4-24.2) | 24.5 (23.6-25.3) |
|                          | Women | 22.0 (20.9-23.0)                                       | 21.7 (20.6-22.7) | 22.8 (21.7-23.8) | 25.0 (23.8-26.1)                                       | 24.6 (23.4-25.8) | 25.3 (24.1-26.4) |
| Timor-Leste              | Men   | 18.8 (17.4-20.2)                                       | 18.7 (17.2-20.1) | 19.3 (17.9-20.8) | 21.0 (20.5-21.6)                                       | 20.8 (20.3-21.4) | 21.5 (20.9-22.1) |
|                          | Women | 18.5 (16.5-20.5)                                       | 18.2 (16.2-20.2) | 19.7 (17.6-21.6) | 21.2 (20.6-21.8)                                       | 20.9 (20.2-21.5) | 21.9 (21.3-22.6) |
| Togo                     | Men   | 20.6 (19.2-22.1)                                       | 20.3 (18.8-21.8) | 21.6 (20.0-23.1) | 22.5 (21.6-23.5)                                       | 22.1 (21.0-23.1) | 23.2 (22.1-24.4) |
|                          | Women | 20.9 (19.3-22.5)                                       | 20.3 (18.6-22.0) | 22.7 (21.0-24.4) | 24.2 (23.4-25.0)                                       | 22.7 (21.9-23.6) | 26.3 (25.3-27.2) |
| Tokelau                  | Men   | 29.6 (28.1-31.1)                                       | 29.6 (28.1-31.1) | na*              | 32.3 (31.4-33.2)                                       | 32.3 (31.4-33.2) | na*              |
|                          | Women | 31.7 (29.6-33.7)                                       | 31.7 (29.6-33.7) | na*              | 33.4 (32.4-34.4)                                       | 33.4 (32.4-34.4) | na*              |
| Tonga                    | Men   | 28.8 (27.4-30.2)                                       | 28.4 (27.0-29.9) | 30.3 (28.7-31.8) | 30.9 (30.0-31.8)                                       | 30.8 (29.9-31.8) | 31.1 (29.8-32.3) |
|                          | Women | 32.0 (30.0-33.9)                                       | 31.7 (29.7-33.8) | 32.8 (30.6-34.9) | 33.6 (32.4-34.8)                                       | 33.3 (32.1-34.6) | 34.3 (32.7-36.0) |
| Trinidad and Tobago      | Men   | 24.3 (23.1-25.5)                                       | 24.2 (22.9-25.4) | 25.3 (24.1-26.6) | 26.9 (25.5-28.2)                                       | 26.8 (25.4-28.2) | 27.6 (26.0-29.1) |
|                          | Women | 25.4 (23.8-27.0)                                       | 25.2 (23.6-26.9) | 26.9 (25.2-28.5) | 28.7 (26.8-30.6)                                       | 28.6 (26.7-30.5) | 29.3 (27.2-31.4) |
| Tunisia                  | Men   | 22.4 (21.3-23.5)                                       | 21.9 (20.7-23.0) | 22.9 (21.8-24.0) | 25.5 (24.6-26.5)                                       | 24.8 (23.8-25.8) | 25.9 (24.9-26.9) |
|                          | Women | 24.6 (23.2-26.1)                                       | 23.4 (21.8-24.9) | 25.7 (24.2-27.2) | 27.6 (26.4-28.9)                                       | 26.8 (25.4-28.1) | 28.1 (26.8-29.3) |
| Turkey                   | Men   | 24.1 (23.3-24.8)                                       | 24.0 (23.1-24.8) | 24.1 (23.3-24.9) | 27.0 (26.6-27.4)                                       | 26.8 (26.3-27.3) | 27.1 (26.6-27.5) |
|                          | Women | 26.2 (25.3-27.1)                                       | 25.7 (24.7-26.7) | 26.7 (25.7-27.7) | 28.8 (28.3-29.3)                                       | 28.8 (28.1-29.4) | 28.8 (28.2-29.3) |
| Turkmenistan             | Men   | 24.0 (22.4-25.5)                                       | 23.6 (22.0-25.3) | 24.4 (22.8-26.0) | 26.5 (25.7-27.3)                                       | 26.3 (25.4-27.3) | 26.7 (25.8-27.7) |
|                          | Women | 23.0 (21.2-24.9)                                       | 22.6 (20.6-24.6) | 23.6 (21.5-25.6) | 26.6 (25.7-27.6)                                       | 26.6 (25.4-27.8) | 26.6 (25.4-27.9) |
| Tuvalu                   | Men   | 28.3 (25.8-30.7)                                       | 27.6 (25.1-30.1) | 29.5 (26.9-32.0) | 30.3 (27.9-32.7)                                       | 30.2 (27.8-32.6) | 30.4 (27.9-32.8) |
|                          | Women | 29.5 (26.4-32.7)                                       | 29.2 (26.0-32.4) | 30.2 (26.9-33.4) | 31.2 (28.1-34.4)                                       | 30.7 (27.4-33.9) | 31.6 (28.3-34.9) |
| Uganda                   | Men   | 19.5 (18.2-20.8)                                       | 19.4 (18.1-20.7) | 20.6 (19.3-22.0) | 21.5 (21.0-22.0)                                       | 21.3 (20.7-21.8) | 22.7 (22.1-23.2) |
|                          | Women | 20.7 (19.3-22.1)                                       | 20.5 (19.1-21.9) | 22.6 (21.2-24.1) | 23.3 (22.7-23.9)                                       | 22.8 (22.2-23.5) | 25.7 (25.0-26.4) |
| Ukraine                  | Men   | 25.0 (22.5-27.4)                                       | 25.1 (22.6-27.5) | 25.0 (22.5-27.4) | 26.8 (24.3-29.2)                                       | 26.6 (24.1-29.0) | 26.9 (24.4-29.3) |
|                          | Women | 25.8 (23.9-27.9)                                       | 26.2 (24.0-28.4) | 25.6 (23.6-27.7) | 26.1 (24.2-28.0)                                       | 26.6 (24.5-28.7) | 25.9 (23.9-27.8) |
| United Arab Emirates     | Men   | 25.1 (24.0-26.2)                                       | 24.4 (23.2-25.7) | 25.3 (24.1-26.4) | 28.1 (27.1-29.0)                                       | 27.3 (26.3-28.3) | 28.2 (27.2-29.2) |
|                          | Women | 26.5 (25.1-27.9)                                       | 24.7 (23.0-26.3) | 27.0 (25.6-28.4) | 29.5 (28.2-30.7)                                       | 28.2 (26.9-29.5) | 29.7 (28.4-31.0) |
| United Kingdom           | Men   | 24.7 (24.4-25.1)                                       | 24.9 (24.5-25.4) | 24.7 (24.3-25.1) | 27.3 (26.9-27.6)                                       | 27.4 (27.0-27.7) | 27.3 (26.9-27.6) |
|                          | Women | 24.3 (23.8-24.8)                                       | 24.4 (23.8-24.9) | 24.3 (23.8-24.8) | 26.8 (26.4-27.2)                                       | 26.6 (26.2-27.0) | 26.9 (26.5-27.3) |
| United States of America | Men   | 25.8 (25.3-26.3)                                       | 26.1 (25.5-26.7) | 25.7 (25.2-26.2) | 28.9 (28.5-29.4)                                       | 29.2 (28.7-29.7) | 28.8 (28.4-29.3) |
|                          | Women | 25.7 (25.1-26.3)                                       | 26.0 (25.2-26.8) | 25.6 (25.0-26.2) | 29.1 (28.6-29.6)                                       | 29.5 (28.9-30.1) | 29.0 (28.5-29.6) |
| Uruguay                  | Men   | 24.4 (23.0-25.8)                                       | 23.4 (21.8-25.1) | 24.5 (23.1-25.9) | 27.2 (26.2-28.3)                                       | 26.3 (25.0-27.6) | 27.3 (26.3-28.3) |
|                          | Women | 24.6 (22.7-26.6)                                       | 23.5 (21.2-25.8) | 24.7 (22.8-26.8) | 27.4 (26.1-28.7)                                       | 27.1 (25.2-28.9) | 27.4 (26.1-28.7) |
| Uzbekistan               | Men   | 23.6 (22.2-24.9)                                       | 23.4 (22.0-24.7) | 23.8 (22.4-25.2) | 26.3 (25.6-27.1)                                       | 26.3 (25.5-27.1) | 26.3 (25.6-27.1) |
|                          | Women | 23.1 (21.5-24.7)                                       | 22.8 (21.1-24.5) | 23.6 (21.9-25.3) | 27.5 (26.6-28.4)                                       | 27.6 (26.6-28.6) | 27.3 (26.3-28.3) |
| Vanuatu                  | Men   | 23.9 (22.6-25.2)                                       | 23.6 (22.3-25.0) | 25.3 (23.7-26.8) | 25.9 (24.9-26.8)                                       | 25.8 (24.8-26.8) | 26.0 (24.7-27.3) |
|                          | Women | 24.4 (22.7-26.1)                                       | 24.2 (22.4-25.9) | 25.4 (23.3-27.5) | 26.8 (25.5-28.0)                                       | 26.5 (25.2-27.8) | 27.6 (25.9-29.3) |
| Venezuela                | Men   | 24.7 (23.3-26.0)                                       | 23.7 (22.2-25.2) | 24.9 (23.5-26.3) | 26.8 (26.1-27.5)                                       | 25.7 (24.9-26.5) | 26.9 (26.2-27.6) |
|                          | Women | 24.0 (22.2-25.9)                                       | 22.6 (20.7-24.6) | 24.3 (22.5-26.2) | 26.9 (26.2-27.7)                                       | 26.1 (25.3-27.0) | 27.0 (26.2-27.8) |
| Viet Nam                 | Men   | 19.0 (18.3-19.6)                                       | 18.8 (18.1-19.5) | 19.8 (19.0-20.5) | 21.8 (21.2-22.3)                                       | 21.4 (20.9-22.0) | 22.4 (21.9-23.0) |
|                          | Women | 18.5 (17.7-19.4)                                       | 18.2 (17.4-19.1) | 19.8 (18.9-20.7) | 21.8 (21.2-22.4)                                       | 21.4 (20.8-22.1) | 22.5 (21.8-23.1) |
| Yemen                    | Men   | 21.3 (20.0-22.6)                                       | 21.2 (19.8-22.5) | 22.0 (20.7-23.4) | 24.0 (23.0-24.9)                                       | 23.6 (22.7-24.6) | 24.5 (23.6-25.5) |
|                          | Women | 20.5 (18.9-22.0)                                       | 20.0 (18.4-21.6) | 22.5 (20.9-24.1) | 24.3 (23.4-25.2)                                       | 23.7 (22.8-24.6) | 25.5 (24.5-26.4) |

| Country  | Sex   | Age-standardised mean BMI in 1985 (kg/m <sup>2</sup> ) |                  |                  | Age-standardised mean BMI in 2017 (kg/m <sup>2</sup> ) |                  |                  |
|----------|-------|--------------------------------------------------------|------------------|------------------|--------------------------------------------------------|------------------|------------------|
|          |       | National                                               | Rural            | Urban            | National                                               | Rural            | Urban            |
| Zambia   | Men   | 20.0 (18.6-21.4)                                       | 19.6 (18.1-21.1) | 20.7 (19.2-22.0) | 22.2 (21.6-22.9)                                       | 21.7 (21.0-22.4) | 23.0 (22.3-23.7) |
|          | Women | 21.4 (20.3-22.6)                                       | 20.7 (19.5-21.9) | 22.5 (21.3-23.7) | 23.9 (23.3-24.5)                                       | 22.7 (22.1-23.3) | 25.5 (24.9-26.2) |
| Zimbabwe | Men   | 21.2 (20.2-22.3)                                       | 20.9 (19.8-22.1) | 22.1 (21.1-23.1) | 22.3 (21.7-22.9)                                       | 21.9 (21.2-22.5) | 23.3 (22.6-23.9) |
|          | Women | 24.6 (23.5-25.9)                                       | 24.0 (22.8-25.4) | 26.5 (25.3-27.8) | 25.3 (24.6-26.1)                                       | 24.5 (23.7-25.3) | 27.1 (26.2-27.9) |

\*The entire population live in areas classified as urban (Bermuda, Hong Kong (from 1992 onwards), Nauru and Singapore) or rural (Tokelau).

Numbers in parentheses show 95% credible intervals.

## References

- 1 Finucane, M. M., Paciorek, C. J., Danaei, G. & Ezzati, M. Bayesian estimation of population-level trends in measures of health status. *Stat. Sci.* **29**, 18-25 (2014).
- 2 Finucane, M. M., Paciorek, C. J., Stevens, G. A. & Ezzati, M. Semiparametric Bayesian density estimation with disparate data sources: a meta-analysis of global childhood undernutrition. *J. Am. Stat. Assoc.* **110**, 889-901 (2015).
- 3 Danaei, G. *et al.* National, regional, and global trends in systolic blood pressure since 1980: systematic analysis of health examination surveys and epidemiological studies with 786 country-years and 5.4 million participants. *Lancet* **377**, 568-577 (2011).
- 4 Stevens, G. A. *et al.* Global, regional, and national trends in haemoglobin concentration and prevalence of total and severe anaemia in children and pregnant and non-pregnant women for 1995–2011: a systematic analysis of population-representative data. *Lancet Glob Health* **1**, e16-e25 (2013) DOI: [https://doi.org/10.1016/s2214-109x\(13\)70001-9](https://doi.org/10.1016/s2214-109x(13)70001-9).
- 5 NCD Risk Factor Collaboration (NCD-RisC). Worldwide trends in body-mass index, underweight, overweight, and obesity from 1975 to 2016: a pooled analysis of 2416 population-based measurement studies in 128.9 million children, adolescents, and adults. *Lancet* **390**, 2627-2642 (2017).
- 6 NCD Risk Factor Collaboration (NCD-RisC). Trends in adult body-mass index in 200 countries from 1975 to 2014: a pooled analysis of 1698 population-based measurement studies with 19.2 million participants. *Lancet* **387**, 1377-1396 (2016).
- 7 Gelman, A. & Hill, J. *Data analysis using regression and multilevel/hierarchical models*. (Cambridge University Press, 2007).
- 8 Gelman, A. Prior distributions for variance parameters in hierarchical models. *Bayesian Anal.* **1**, 515-533 (2006).
- 9 Finucane, M. M. *et al.* National, regional, and global trends in body-mass index since 1980: systematic analysis of health examination surveys and epidemiological studies with 960 country-years and 9.1 million participants. *Lancet* **377**, 557-567 (2011).
- 10 Breslow, N. E. & Clayton, D. G. Approximate inference in generalized linear mixed models. *J. Am. Stat. Assoc.* **88**, 9-25 (1993).
- 11 Rue, H. & Held, L. *Gaussian Markov random fields: theory and applications*. (Chapman & Hall, 2005).
- 12 Wood, S. N. *Generalized additive models: an introduction with R*. (CRC Press, 2006).
- 13 Harville, D. A. *Matrix algebra from a statistician's perspective*. (Springer-Verlag, 2008).
- 14 Kuchibhatla, M. N., Fillenbaum, G. G., Kraus, W. E., Cohen, H. J. & Blazer, D. G. Trajectory classes of body mass index in a representative elderly community sample. *J. Gerontol. A. Biol. Sci. Med. Sci.* **68**, 699-704 (2013).
- 15 Østbye, T., Malhotra, R. & Landerman, L. R. Body mass trajectories through adulthood: results from the National Longitudinal Survey of Youth 1979 Cohort (1981–2006). *Int. J. Epidemiol.* **40**, 240-250 (2011).
- 16 Wang, M. *et al.* Body mass index trajectories among middle-aged and elderly Canadians and associated health outcomes. *J. Environ. Public Health* **2016**, 7014857 (2016).
- 17 NCD Risk Factor Collaboration (NCD-RisC). A century of trends in adult human height. *eLife* **5**, e13410 (2016) DOI: <https://doi.org/10.7554/eLife.13410>.
- 18 NCD Risk Factor Collaboration (NCD-RisC). Worldwide trends in diabetes since 1980: a pooled analysis of 751 population-based studies with 4.4 million participants. *Lancet* **387**, 1513-1530 (2016).

- 19 NCD Risk Factor Collaboration (NCD-RisC). Worldwide trends in blood pressure from 1975 to 2015: a pooled analysis of 1479 population-based measurement studies with 19.1 million participants. *Lancet* **389**, 37-55 (2017).
